# Supplementary material for: Elucidating SNP-based genetic diversity and population structure of advanced breeding lines of bread wheat (Triticum aestivum L.)
Source: PeerJ. 2021 Jun 22;9:e11593. doi: 10.7717/peerj.11593 (PMC8231316; doi:10.7717/peerj.11593)
Supplement: Supplemental Information 1 [file peerj-09-11593-s001.xlsx]

## Sheet: Sheet5
GID	Origin	Cross Name	Selection History
304660	GSP15-16\\0	LOCAL CHECK (GW322)
6175067	MXI15-16\MULTTESTIGOS\13	NADI	CMSS06B00734T-099TOPY-099ZTM-099Y-099M-13WGY-0B
6341870	MXI15-16\MULTTESTIGOS\15	MUCUY	CMSS07Y01083T-099TOPM-099Y-099M-099Y-40M-0WGY
7310216	MXI15-16\M50IBW/M34SA\395	BECARD/AKURI/4/WBLL1*2/BRAMBLING//JUCHI/3/WBLL1*2/BRAMBLING	CMSS11B00110S-099M-0SY-8M-0WGY
7310280	MXI15-16\M50IBW/M34SA\409	BORL14//KFA/2*KACHU	CMSS11B00167S-099M-0SY-11M-0WGY
7310282	MXI15-16\M50IBW/M34SA\410	BORL14//KFA/2*KACHU	CMSS11B00167S-099M-0SY-13M-0WGY
7310423	MXI15-16\M50IBW/M34SA\468	SUP152/BAJ #1/3/KACHU #1/KIRITATI//KACHU	CMSS11B00326S-099M-0SY-22M-0WGY
7310704	MXI15-16\M50IBW/M34SA\502	MUU/KBIRD/3/PRL/2*PASTOR*2//FH6-1-7	CMSS11B00509S-099M-0SY-21M-0WGY
7310723	MXI15-16\M50IBW/M34SA\504	BECARD/QUAIU #1//BORL14	CMSS11B00516S-099M-0SY-18M-0WGY
7310785	MXI15-16\M50IBW/M34SA\511	BECARD//ND643/2*WBLL1/4/KIRITATI//ATTILA*2/PASTOR/3/AKURI	CMSS11B00527S-099M-0SY-21M-0WGY
7310807	MXI15-16\M50IBW/M34SA\524	SITE/MO//PASTOR/3/TILHI/4/MUNAL #1/5/MUNAL/6/MUCUY	CMSS11B00540S-099M-0SY-15M-0WGY
7310835	MXI15-16\M50IBW/M34SA\526	ND643//2*ATTILA*2/PASTOR/3/WBLL1*2/KURUKU/4/WBLL1*2/BRAMBLING/6/BABAX/LR42//BABAX*2/3/KUKUNA/4/CROSBILL #1/5/BECARD	CMSS11B00546S-099M-0SY-1M-0WGY
7310893	MXI15-16\M50IBW/M34SA\530	FRET2/TUKURU//FRET2/3/MUNAL #1/4/SUP152/AKURI//SUP152	CMSS11B00550S-099M-0SY-36M-0WGY
7310905	MXI15-16\M50IBW/M34SA\533	KACHU/KIRITATI//BORL14	CMSS11B00551S-099M-0SY-16M-0WGY
7311040	MXI15-16\M50IBW/M34SA\543	TEPOCA+LR34/ATTILA//TILHI/3/ATTILA*2/PBW65/4/ATTILA*2/PBW65*2//KACHU/5/AMUR	CMSS11B00623T-099TOPY-099M-0SY-17M-0WGY
7311077	MXI15-16\M50IBW/M34SA\549	ALTAR 84/AE.SQ//OPATA/3/2*WH 542/7/VEE#8//JUP/BJY/3/F3.71/TRM/4/BCN/5/KAUZ/6/MILAN/KAUZ/8/ATTILA*2/PBW65/9/BAV92//IRENA/KAUZ/3/HUITES*2/4/CROC_1/AE.SQUARROSA (224)//KULIN/3/WESTONIA/10/WBLL1*2/BRAMBLING//KACHU	CMSS11B00626T-099TOPY-099M-0SY-9M-0WGY
7311612	MXI15-16\M50IBW/M34SA\668	MUNAL #1/FRANCOLIN #1/4/KZA//WH 542/2*PASTOR/3/BACEU #1/5/MUNAL*2//WAXWING*2/TUKURU	CMSS11B00802T-099TOPY-099M-0SY-6M-0WGY
7311894	MXI15-16\M50IBW/M34SA\696	FRANCOLIN #1/YANAC*2/3/PBW343*2/KUKUNA*2//FRTL/PIFED	CMSS11B00891T-099TOPY-099M-0SY-39M-0WGY
7311895	MXI15-16\M50IBW/M34SA\697	FRANCOLIN #1/YANAC*2/3/KINGBIRD #1//INQALAB 91*2/TUKURU	CMSS11B00892T-099TOPY-099M-0SY-2M-0WGY
7312223	MXI15-16\M50IBW/M34SA\775	YAV_3/SCO//JO69/CRA/3/YAV79/4/AE.SQUARROSA (498)/5/LINE 1073/6/KAUZ*2/4/CAR//KAL/BB/3/NAC/5/KAUZ/7/KRONSTAD F2004/8/KAUZ/PASTOR//PBW343/9/PBW343*2/KUKUNA*2//FRTL/PIFED/10/KIRITATI//PRL/2*PASTOR/5/OASIS/SKAUZ//4*BCN/3/PASTOR/4/KAUZ*2/YACO//KAUZ/6/KIRI	CMSS11B01003T-099TOPY-099M-0SY-24M-0WGY
7312360	MXI15-16\M50IBW/M34SA\7	AMUR/3/KINGBIRD #1//INQALAB 91*2/TUKURU	CMSS11Y00053S-099Y-099M-0SY-6M-0WGY
7312378	MXI15-16\M50IBW/M34SA\9	TRCH/5/REH/HARE//2*BCN/3/CROC_1/AE.SQUARROSA (213)//PGO/4/HUITES/6/SAUAL/3/C80.1/3*BATAVIA//2*WBLL1/4/SITE/MO//PASTOR/3/TILHI	CMSS11Y00063S-099Y-099M-0SY-8M-0WGY
7312934	MXI15-16\M50IBW/M34SA\103	WBLL1/KUKUNA//TACUPETO F2001/3/BAJ #1*2/4/AMUR	CMSS11Y00775T-099TOPM-099Y-099M-0SY-20M-0WGY
7312955	MXI15-16\M50IBW/M34SA\105	WBLL1*2/4/YACO/PBW65/3/KAUZ*2/TRAP//KAUZ/5/KACHU #1/6/PBW343*2/KUKUNA*2//FRTL/PIFED/7/PBW343*2/KUKUNA*2//FRTL/PIFED	CMSS11Y00785T-099TOPM-099Y-099M-0SY-4M-0WGY
7313028	MXI15-16\M50IBW/M34SA\138	KACHU/SAUAL*2//COPIO	CMSS11Y00827T-099TOPM-099Y-099M-0SY-11M-0WGY
7313031	MXI15-16\M50IBW/M34SA\140	KACHU/SAUAL*2//COPIO	CMSS11Y00827T-099TOPM-099Y-099M-0SY-14M-0WGY
7313048	MXI15-16\M50IBW/M34SA\148	SAUAL/MUTUS/3/KINGBIRD #1//INQALAB 91*2/TUKURU/4/BAJ #1/TECUE #1	CMSS11Y00830T-099TOPM-099Y-099M-0SY-15M-0WGY
7313392	MXI15-16\M50IBW/M34SA\240	SAUAL/4/CROC_1/AE.SQUARROSA (205)//KAUZ/3/ATTILA/5/SAUAL/8/TACUPETO F2001/6/CNDO/R143//ENTE/MEXI_2/3/AEGILOPS SQUARROSA (TAUS)/4/WEAVER/5/PASTOR/7/ROLF07/9/SAUAL/YANAC//SAUAL	CMSS11Y01008T-099TOPM-099Y-099M-0SY-16M-0WGY
7313462	MXI15-16\M50IBW/M34SA\255	BECARD/AKURI*2/3/PBW343*2/KUKUNA*2//FRTL/PIFED	CMSS11Y01036T-099TOPM-099Y-099M-0SY-26M-0WGY
7313724	MXI15-16\M50IBW/M34SA\324	SAUAL/YANAC//SAUAL*2/3/TACUPETO F2001/BRAMBLING*2//KACHU	CMSS11Y01150T-099TOPM-099Y-099M-0SY-11M-0WGY
7313804	MXI15-16\M50IBW/M34SA\342	TACUPETO F2001/6/CNDO/R143//ENTE/MEXI_2/3/AEGILOPS SQUARROSA (TAUS)/4/WEAVER/5/PASTOR/7/ROLF07*2/8/SAUAL/YANAC//SAUAL	CMSS11Y01173T-099TOPM-099Y-099M-0SY-14M-0WGY
7313806	MXI15-16\M50IBW/M34SA\343	TACUPETO F2001/6/CNDO/R143//ENTE/MEXI_2/3/AEGILOPS SQUARROSA (TAUS)/4/WEAVER/5/PASTOR/7/ROLF07*2/8/SAUAL/YANAC//SAUAL	CMSS11Y01173T-099TOPM-099Y-099M-0SY-26M-0WGY
7395694	MXI15-16\M50IBW/M34SA\374	KACHU/SUP152	CMSS11B00007S-099M-099NJ-099NJ-18WGY-0B
7395822	MXI15-16\M50IBW/M34SA\378	SAUAL/MUTUS/4/KACHU #1//WBLL1*2/KUKUNA/3/BRBT1*2/KIRITATI	CMSS11B00042S-099M-099NJ-099NJ-21WGY-0B
7395899	MXI15-16\M50IBW/M34SA\382	PBW343*2/KUKUNA*2//FRTL/PIFED/5/KACHU #1/3/C80.1/3*BATAVIA//2*WBLL1/4/KACHU	CMSS11B00079S-099M-099NJ-099NJ-15WGY-0B
7396039	MXI15-16\M50IBW/M34SA\397	KASUKO	CMSS11B00123S-099M-099NJ-099NJ-34WGY-0B
7396104	MXI15-16\M50IBW/M34SA\403	SITE/MO//PASTOR/3/TILHI/4/WAXWING/KIRITATI/5/KACHU #1/KIRITATI//KACHU	CMSS11B00147S-099M-099NJ-099NJ-24WGY-0B
7396133	MXI15-16\M50IBW/M34SA\416	BORL14//KFA/2*KACHU	CMSS11B00167S-099M-099NJ-099NJ-5WGY-0B
7396143	MXI15-16\M50IBW/M34SA\421	BORL14//KFA/2*KACHU	CMSS11B00167S-099M-099NJ-099NJ-25WGY-0B
7396161	MXI15-16\M50IBW/M34SA\425	SAUAL/YANAC//SAUAL/3/BECARD/QUAIU #1	CMSS11B00183S-099M-099NJ-099NJ-14WGY-0B
7396172	MXI15-16\M50IBW/M34SA\429	PBW343*2/KUKUNA*2//FRTL/PIFED/3/KFA/2*KACHU	CMSS11B00190S-099M-099NJ-099NJ-20WGY-0B
7396194	MXI15-16\M50IBW/M34SA\434	TILILA/TUKURU/4/SERI.1B*2/3/KAUZ*2/BOW//KAUZ/5/KFA/2*KACHU	CMSS11B00196S-099M-099NJ-099NJ-6WGY-0B
7396209	MXI15-16\M50IBW/M34SA\441	WAXWING/2*ROLF07//BORL14	CMSS11B00199S-099M-099NJ-099NJ-22WGY-0B
7396228	MXI15-16\M50IBW/M34SA\443	WBLL1/FRET2//PASTOR*2/3/MURGA/5/ND643//2*ATTILA*2/PASTOR/3/WBLL1*2/KURUKU/4/WBLL1*2/BRAMBLING	CMSS11B00211S-099M-099NJ-099NJ-4WGY-0B
7396235	MXI15-16\M50IBW/M34SA\445	KUTZ//KFA/2*KACHU	CMSS11B00214S-099M-099NJ-099NJ-8WGY-0B
7396236	MXI15-16\M50IBW/M34SA\446	KUTZ//KFA/2*KACHU	CMSS11B00214S-099M-099NJ-099NJ-9WGY-0B
7396355	MXI15-16\M50IBW/M34SA\461	WBLL1*2/SHAMA//BAJ #1/3/BORL14	CMSS11B00257S-099M-099NJ-099NJ-31WGY-0B
7396550	MXI15-16\M50IBW/M34SA\479	MUCUY//MUTUS*2/TECUE #1	CMSS11B00372S-099M-099NJ-099NJ-19WGY-0B
7396624	MXI15-16\M50IBW/M34SA\483	BECARD/FRNCLN/3/KACHU #1/KIRITATI//KACHU	CMSS11B00426S-099M-099NJ-099NJ-3WGY-0B
7396638	MXI15-16\M50IBW/M34SA\484	CHEWINK #1/CHYAK/5/UP2338*2/VIVITSI/3/FRET2/TUKURU//FRET2/4/MISR 1	CMSS11B00439S-099M-099NJ-099NJ-8WGY-0B
7396639	MXI15-16\M50IBW/M34SA\485	CHEWINK #1/CHYAK/5/UP2338*2/VIVITSI/3/FRET2/TUKURU//FRET2/4/MISR 1	CMSS11B00439S-099M-099NJ-099NJ-11WGY-0B
7396710	MXI15-16\M50IBW/M34SA\499	SHORTENED SR26 TRANSLOCATION/4/ATTILA/3*BCN//BAV92/3/PASTOR/5/MUNAL/6/MUTUS*2/TECUE #1	CMSS11B00492S-099M-099NJ-099NJ-11WGY-0B
7396745	MXI15-16\M50IBW/M34SA\512	ATTILA/3*BCN//BAV92/3/PASTOR/4/TACUPETO F2001*2/BRAMBLING/5/PAURAQ/6/KFA/2*KACHU	CMSS11B00529S-099M-099NJ-099NJ-13WGY-0B
7397016	MXI15-16\M50IBW/M34SA\569	SAUAL/MUTUS/3/ATTILA*2/PBW65*2//KACHU/4/SUP152/AKURI//SUP152	CMSS11B00651T-099TOPY-099M-099NJ-099NJ-59WGY-0B
7397073	MXI15-16\M50IBW/M34SA\578	AMUR/3/KINGBIRD #1//INQALAB 91*2/TUKURU/4/AMUR	CMSS11B00657T-099TOPY-099M-099NJ-099NJ-11WGY-0B
7397372	MXI15-16\M50IBW/M34SA\614	CNO79//PF70354/MUS/3/PASTOR/4/BAV92*2/5/HAR311/6/PBW343*2/KUKUNA*2//FRTL/PIFED/7/CNO79//PF70354/MUS/3/PASTOR/4/BAV92*2/5/HAR311	CMSS11B00745T-099TOPY-099M-099NJ-099NJ-40WGY-0B
7397501	MXI15-16\M50IBW/M34SA\626	ATTILA*2/PBW65*2//MURGA/4/MUU #1//PBW343*2/KUKUNA/3/MUU/5/ATTILA*2/PBW65//MURGA	CMSS11B00768T-099TOPY-099M-099NJ-099NJ-3WGY-0B
7397687	MXI15-16\M50IBW/M34SA\662	WAXWING/KIRITATI*2/3/C80.1/3*BATAVIA//2*WBLL1/4/COPIO/5/ND643//2*ATTILA*2/PASTOR/3/WBLL1*2/KURUKU/4/WBLL1*2/BRAMBLING	CMSS11B00790T-099TOPY-099M-099NJ-099NJ-6WGY-0B
7397691	MXI15-16\M50IBW/M34SA\663	WAXWING/KIRITATI*2/3/C80.1/3*BATAVIA//2*WBLL1/4/COPIO/5/ND643//2*ATTILA*2/PASTOR/3/WBLL1*2/KURUKU/4/WBLL1*2/BRAMBLING	CMSS11B00790T-099TOPY-099M-099NJ-099NJ-39WGY-0B
7397728	MXI15-16\M50IBW/M34SA\667	MUNAL #1/FRANCOLIN #1/5/KIRITATI/4/2*BAV92//IRENA/KAUZ/3/HUITES/6/BECARD/FRNCLN	CMSS11B00801T-099TOPY-099M-099NJ-099NJ-7WGY-0B
7397747	MXI15-16\M50IBW/M34SA\670	FRNCLN/ROLF07/3/KACHU #1/KIRITATI//KACHU/4/FRANCOLIN #1/YANAC	CMSS11B00807T-099TOPY-099M-099NJ-099NJ-42WGY-0B
7397754	MXI15-16\M50IBW/M34SA\671	FRNCLN/ROLF07//COPIO/3/FRNCLN*2/TECUE #1	CMSS11B00810T-099TOPY-099M-099NJ-099NJ-14WGY-0B
7397815	MXI15-16\M50IBW/M34SA\675	FRANCOLIN #1//WBLL1*2/BRAMBLING*2/3/COPIO	CMSS11B00832T-099TOPY-099M-099NJ-099NJ-29WGY-0B
7398014	MXI15-16\M50IBW/M34SA\684	BECARD/AKURI/3/KINGBIRD #1//INQALAB 91*2/TUKURU/4/BECARD/AKURI	CMSS11B00865T-099TOPY-099M-099NJ-099NJ-3WGY-0B
7398212	MXI15-16\M50IBW/M34SA\702	NADI/3/PBW343*2/KUKUNA*2//FRTL/PIFED/4/NADI	CMSS11B00908T-099TOPY-099M-099NJ-099NJ-32WGY-0B
7398217	MXI15-16\M50IBW/M34SA\703	NADI/3/KINGBIRD #1//INQALAB 91*2/TUKURU/4/NADI	CMSS11B00909T-099TOPY-099M-099NJ-099NJ-3WGY-0B
7398235	MXI15-16\M50IBW/M34SA\706	NADI/COPIO//NADI	CMSS11B00910T-099TOPY-099M-099NJ-099NJ-2WGY-0B
7398245	MXI15-16\M50IBW/M34SA\709	NADI/COPIO//NADI	CMSS11B00910T-099TOPY-099M-099NJ-099NJ-37WGY-0B
7398376	MXI15-16\M50IBW/M34SA\726	WBLL1*2/KURUKU//HEILO/3/WBLL1*2/KURUKU/4/TACUPETO F2001/BRAMBLING*2//KACHU/5/WBLL1*2/KURUKU//HEILO/3/WBLL1*2/KURUKU	CMSS11B00944T-099TOPY-099M-099NJ-099NJ-8WGY-0B
7398701	MXI15-16\M50IBW/M34SA\19	PSN/BOW//SERI/3/MILAN/4/ATTILA/5/KAUZ*2/CHEN//BCN/3/MILAN/6/WBLL1*2/SHAMA/7/SAUAL/YANAC//SAUAL	CMSS11Y00086S-099Y-099M-099NJ-099NJ-6WGY-0B
7398846	MXI15-16\M50IBW/M34SA\45	ATTILA*2/PBW65*2//MURGA/3/FRANCOLIN #1//WBLL1*2/KIRITATI	CMSS11Y00172S-099Y-099M-099NJ-099NJ-5WGY-0B
7398872	MXI15-16\M50IBW/M34SA\47	KACHU #1/YUNMAI 47//KACHU/5/SAUAL/3/C80.1/3*BATAVIA//2*WBLL1/4/SITE/MO//PASTOR/3/TILHI	CMSS11Y00191S-099Y-099M-099NJ-099NJ-11WGY-0B
7398920	MXI15-16\M50IBW/M34SA\55	BOKOTA/3/KINGBIRD #1//INQALAB 91*2/TUKURU	CMSS11Y00247S-099Y-099M-099NJ-099NJ-35WGY-0B
7399013	MXI15-16\M50IBW/M34SA\72	FRANCOLIN #1/YANAC/5/KIRITATI/4/2*BAV92//IRENA/KAUZ/3/HUITES	CMSS11Y00302S-099Y-099M-099NJ-099NJ-28WGY-0B
7399014	MXI15-16\M50IBW/M34SA\73	FRANCOLIN #1/YANAC/5/KIRITATI/4/2*BAV92//IRENA/KAUZ/3/HUITES	CMSS11Y00302S-099Y-099M-099NJ-099NJ-30WGY-0B
7399072	MXI15-16\M50IBW/M34SA\77	HUIRIVIS #1*2/MURGA/3/TACUPETO F2001/BRAMBLING*2//KACHU	CMSS11Y00343S-099Y-099M-099NJ-099NJ-11WGY-0B
7399179	MXI15-16\M50IBW/M34SA\89	SEHER 06/3/PBW343*2/KUKUNA//TECUE #1	CMSS11Y00430S-099Y-099M-099NJ-099NJ-10WGY-0B
7399180	MXI15-16\M50IBW/M34SA\90	SEHER 06/3/PBW343*2/KUKUNA//TECUE #1	CMSS11Y00430S-099Y-099M-099NJ-099NJ-11WGY-0B
7399267	MXI15-16\M50IBW/M34SA\94	WHEAR//2*PRL/2*PASTOR/3/WAXBI/4/COPIO	CMSS11Y00722T-099TOPM-099Y-099M-099NJ-099NJ-6WGY-0B
7399277	MXI15-16\M50IBW/M34SA\96	WHEAR//2*PRL/2*PASTOR/5/UP2338*2/SHAMA/3/MILAN/KAUZ//CHIL/CHUM18/4/UP2338*2/SHAMA/6/UP2338*2/KKTS*2//YANAC	CMSS11Y00723T-099TOPM-099Y-099M-099NJ-099NJ-16WGY-0B
7399345	MXI15-16\M50IBW/M34SA\101	OTUS//WBLL1*2/TUKURU/3/2*PBW343*2/KUKUNA*2//FRTL/PIFED	CMSS11Y00750T-099TOPM-099Y-099M-099NJ-099NJ-8WGY-0B
7399399	MXI15-16\M50IBW/M34SA\108	TACUPETO F2001/BRAMBLING//PVN/3/KINGBIRD #1//INQALAB 91*2/TUKURU/5/KIRITATI/4/2*BAV92//IRENA/KAUZ/3/HUITES	CMSS11Y00800T-099TOPM-099Y-099M-099NJ-099NJ-14WGY-0B
7399413	MXI15-16\M50IBW/M34SA\110	TACUPETO F2001/BRAMBLING//KIRITATI/5/C80.1/3*BATAVIA//2*WBLL1/3/ATTILA/3*BCN*2//BAV92/4/WBLL1*2/KURUKU/6/ROLF07/YANAC//TACUPETO F2001/BRAMBLING	CMSS11Y00801T-099TOPM-099Y-099M-099NJ-099NJ-37WGY-0B
7399442	MXI15-16\M50IBW/M34SA\114	ATTILA*2/PBW65/5/CNO79//PF70354/MUS/3/PASTOR/4/BAV92/8/2*TACUPETO F2001/6/CNDO/R143//ENTE/MEXI_2/3/AEGILOPS SQUARROSA (TAUS)/4/WEAVER/5/PASTOR/7/ROLF07	CMSS11Y00808T-099TOPM-099Y-099M-099NJ-099NJ-6WGY-0B
7399445	MXI15-16\M50IBW/M34SA\115	FRET2*2/KUKUNA//PRINIA/PASTOR/3/2*COPIO	CMSS11Y00814T-099TOPM-099Y-099M-099NJ-099NJ-11WGY-0B
7399457	MXI15-16\M50IBW/M34SA\122	WBLL1*2/4/YACO/PBW65/3/KAUZ*2/TRAP//KAUZ/5/SAUAL/6/2*KINGBIRD #1//INQALAB 91*2/TUKURU	CMSS11Y00822T-099TOPM-099Y-099M-099NJ-099NJ-8WGY-0B
7399473	MXI15-16\M50IBW/M34SA\125	WBLL1*2/KKTS//PASTOR/KUKUNA/3/KINGBIRD #1//INQALAB 91*2/TUKURU/5/KAUZ//ALTAR 84/AOS/3/MILAN/KAUZ/4/SAUAL	CMSS11Y00824T-099TOPM-099Y-099M-099NJ-099NJ-28WGY-0B
7399485	MXI15-16\M50IBW/M34SA\128	WBLL1*2/KKTS//PASTOR/KUKUNA/3/KINGBIRD #1//INQALAB 91*2/TUKURU/5/KAUZ//ALTAR 84/AOS/3/MILAN/KAUZ/4/SAUAL	CMSS11Y00824T-099TOPM-099Y-099M-099NJ-099NJ-50WGY-0B
7399497	MXI15-16\M50IBW/M34SA\133	KACHU/SAUAL*2/3/KINGBIRD #1//INQALAB 91*2/TUKURU	CMSS11Y00826T-099TOPM-099Y-099M-099NJ-099NJ-19WGY-0B
7399537	MXI15-16\M50IBW/M34SA\150	AMUR*2/3/TRCH/SRTU//KACHU	CMSS11Y00831T-099TOPM-099Y-099M-099NJ-099NJ-18WGY-0B
7399541	MXI15-16\M50IBW/M34SA\154	ROLF07/YANAC//TACUPETO F2001/BRAMBLING*2/5/UP2338*2/SHAMA/3/MILAN/KAUZ//CHIL/CHUM18/4/UP2338*2/SHAMA	CMSS11Y00854T-099TOPM-099Y-099M-099NJ-099NJ-6WGY-0B
7399548	MXI15-16\M50IBW/M34SA\158	ROLF07*2/KIRITATI/3/2*KINGBIRD #1//INQALAB 91*2/TUKURU	CMSS11Y00855T-099TOPM-099Y-099M-099NJ-099NJ-20WGY-0B
7399578	MXI15-16\M50IBW/M34SA\163	FRET2*2/SHAMA//PARUS/3/FRET2*2/KUKUNA*2/4/KINGBIRD #1//INQALAB 91*2/TUKURU	CMSS11Y00868T-099TOPM-099Y-099M-099NJ-099NJ-3WGY-0B
7399601	MXI15-16\M50IBW/M34SA\167	FRET2/KUKUNA//FRET2/3/YANAC/4/FRET2/KIRITATI/5/2*BOKOTA	CMSS11Y00876T-099TOPM-099Y-099M-099NJ-099NJ-17WGY-0B
7399609	MXI15-16\M50IBW/M34SA\169	FRET2/KUKUNA//FRET2/3/YANAC/4/FRET2/KIRITATI/5/2*TACUPETO F2001/BRAMBLING*2//KACHU	CMSS11Y00877T-099TOPM-099Y-099M-099NJ-099NJ-9WGY-0B
7399636	MXI15-16\M50IBW/M34SA\184	TRCH/SRTU//KACHU*2/5/UP2338*2/SHAMA/3/MILAN/KAUZ//CHIL/CHUM18/4/UP2338*2/SHAMA	CMSS11Y00892T-099TOPM-099Y-099M-099NJ-099NJ-20WGY-0B
7399637	MXI15-16\M50IBW/M34SA\185	TRCH/SRTU//KACHU*2/5/UP2338*2/SHAMA/3/MILAN/KAUZ//CHIL/CHUM18/4/UP2338*2/SHAMA	CMSS11Y00892T-099TOPM-099Y-099M-099NJ-099NJ-38WGY-0B
7399638	MXI15-16\M50IBW/M34SA\186	TRCH/SRTU//KACHU*2/5/UP2338*2/SHAMA/3/MILAN/KAUZ//CHIL/CHUM18/4/UP2338*2/SHAMA	CMSS11Y00892T-099TOPM-099Y-099M-099NJ-099NJ-41WGY-0B
7399640	MXI15-16\M50IBW/M34SA\188	TRCH/SRTU//KACHU*2/5/UP2338*2/SHAMA/3/MILAN/KAUZ//CHIL/CHUM18/4/UP2338*2/SHAMA	CMSS11Y00892T-099TOPM-099Y-099M-099NJ-099NJ-45WGY-0B
7399643	MXI15-16\M50IBW/M34SA\190	TRCH/SRTU//KACHU*2/5/UP2338*2/SHAMA/3/MILAN/KAUZ//CHIL/CHUM18/4/UP2338*2/SHAMA	CMSS11Y00892T-099TOPM-099Y-099M-099NJ-099NJ-55WGY-0B
7399644	MXI15-16\M50IBW/M34SA\191	TRCH/SRTU//KACHU*2/5/UP2338*2/SHAMA/3/MILAN/KAUZ//CHIL/CHUM18/4/UP2338*2/SHAMA	CMSS11Y00892T-099TOPM-099Y-099M-099NJ-099NJ-68WGY-0B
7399645	MXI15-16\M50IBW/M34SA\192	TRCH/SRTU//KACHU*2/3/KINGBIRD #1//INQALAB 91*2/TUKURU	CMSS11Y00894T-099TOPM-099Y-099M-099NJ-099NJ-1WGY-0B
7399653	MXI15-16\M50IBW/M34SA\196	TRCH/SRTU//KACHU*2/3/MUU #1/SAUAL//MUU	CMSS11Y00895T-099TOPM-099Y-099M-099NJ-099NJ-39WGY-0B
7399712	MXI15-16\M50IBW/M34SA\200	PBW343*2/KUKUNA//SRTU/3/PBW343*2/KHVAKI/4/VORB/FISCAL//AKURI #1/5/PBW343*2/KUKUNA//SRTU/3/PBW343*2/KHVAKI	CMSS11Y00928T-099TOPM-099Y-099M-099NJ-099NJ-12WGY-0B
7399819	MXI15-16\M50IBW/M34SA\219	WBLL1/3/STAR//KAUZ/STAR/4/BAV92/RAYON/5/TRAP#1/BOW/3/VEE/PJN//2*TUI/4/BAV92/RAYON*2/8/TACUPETO F2001/6/CNDO/R143//ENTE/MEXI_2/3/AEGILOPS SQUARROSA (TAUS)/4/WEAVER/5/PASTOR/7/ROLF07	CMSS11Y00977T-099TOPM-099Y-099M-099NJ-099NJ-16WGY-0B
7399829	MXI15-16\M50IBW/M34SA\222	UP2338*2/SHAMA/3/MILAN/KAUZ//CHIL/CHUM18/4/UP2338*2/SHAMA*2/5/PBW343*2/KUKUNA*2//FRTL/PIFED	CMSS11Y00993T-099TOPM-099Y-099M-099NJ-099NJ-2WGY-0B
7399832	MXI15-16\M50IBW/M34SA\225	UP2338*2/SHAMA/3/MILAN/KAUZ//CHIL/CHUM18/4/UP2338*2/SHAMA*2/5/PBW343*2/KUKUNA*2//FRTL/PIFED	CMSS11Y00993T-099TOPM-099Y-099M-099NJ-099NJ-6WGY-0B
7399875	MXI15-16\M50IBW/M34SA\235	BAV92//IRENA/KAUZ/3/HUITES*2/4/CROC_1/AE.SQUARROSA (224)//KULIN/3/WESTONIA/8/TACUPETO F2001/6/CNDO/R143//ENTE/MEXI_2/3/AEGILOPS SQUARROSA (TAUS)/4/WEAVER/5/PASTOR/7/ROLF07/9/BAV92//IRENA/KAUZ/3/HUITES*2/4/CROC_1/AE.SQUARROSA (224)//KULIN/3/WESTONIA	CMSS11Y01002T-099TOPM-099Y-099M-099NJ-099NJ-21WGY-0B
7399946	MXI15-16\M50IBW/M34SA\256	BECARD/AKURI*2/3/PBW343*2/KUKUNA*2//FRTL/PIFED	CMSS11Y01036T-099TOPM-099Y-099M-099NJ-099NJ-4WGY-0B
7399966	MXI15-16\M50IBW/M34SA\262	BECARD/AKURI*2/3/KINGBIRD #1//INQALAB 91*2/TUKURU	CMSS11Y01037T-099TOPM-099Y-099M-099NJ-099NJ-34WGY-0B
7400073	MXI15-16\M50IBW/M34SA\273	SAUAL*2/6/CNDO/R143//ENTE/MEXI_2/3/AEGILOPS SQUARROSA (TAUS)/4/WEAVER/5/2*PASTOR/7/HUW234+LR34/PRINIA*2//KIRITATI/8/SAUAL/KRONSTAD F2004	CMSS11Y01084T-099TOPM-099Y-099M-099NJ-099NJ-29WGY-0B
7400091	MXI15-16\M50IBW/M34SA\281	SAUAL/3/SW89.3064//CMH82.17/SERI/4/SAUAL/5/PBW343*2/KUKUNA*2//FRTL/PIFED/6/SAUAL/KRONSTAD F2004	CMSS11Y01091T-099TOPM-099Y-099M-099NJ-099NJ-25WGY-0B
7400281	MXI15-16\M50IBW/M34SA\316	COPIO/7/SAUAL*2/6/CNDO/R143//ENTE/MEXI_2/3/AEGILOPS SQUARROSA (TAUS)/4/WEAVER/5/2*PASTOR/8/COPIO	CMSS11Y01144T-099TOPM-099Y-099M-099NJ-099NJ-8WGY-0B
7400293	MXI15-16\M50IBW/M34SA\319	COPIO/7/SAUAL*2/6/CNDO/R143//ENTE/MEXI_2/3/AEGILOPS SQUARROSA (TAUS)/4/WEAVER/5/2*PASTOR/8/COPIO	CMSS11Y01144T-099TOPM-099Y-099M-099NJ-099NJ-38WGY-0B
7400308	MXI15-16\M50IBW/M34SA\328	SAUAL/YANAC//SAUAL/5/UP2338*2/SHAMA/3/MILAN/KAUZ//CHIL/CHUM18/4/UP2338*2/SHAMA/6/UP2338*2/SHAMA/3/MILAN/KAUZ//CHIL/CHUM18/4/UP2338*2/SHAMA	CMSS11Y01152T-099TOPM-099Y-099M-099NJ-099NJ-5WGY-0B
7400311	MXI15-16\M50IBW/M34SA\330	SAUAL/YANAC//SAUAL/5/UP2338*2/SHAMA/3/MILAN/KAUZ//CHIL/CHUM18/4/UP2338*2/SHAMA/6/UP2338*2/SHAMA/3/MILAN/KAUZ//CHIL/CHUM18/4/UP2338*2/SHAMA	CMSS11Y01152T-099TOPM-099Y-099M-099NJ-099NJ-12WGY-0B
7400313	MXI15-16\M50IBW/M34SA\331	SAUAL/YANAC//SAUAL/5/UP2338*2/SHAMA/3/MILAN/KAUZ//CHIL/CHUM18/4/UP2338*2/SHAMA/6/UP2338*2/SHAMA/3/MILAN/KAUZ//CHIL/CHUM18/4/UP2338*2/SHAMA	CMSS11Y01152T-099TOPM-099Y-099M-099NJ-099NJ-17WGY-0B
7400318	MXI15-16\M50IBW/M34SA\334	SAUAL/YANAC//SAUAL/3/SUP152/MUU/4/SAUAL/YANAC//SAUAL	CMSS11Y01153T-099TOPM-099Y-099M-099NJ-099NJ-7WGY-0B
7400337	MXI15-16\M50IBW/M34SA\340	WBLL1*2/4/BABAX/LR42//BABAX/3/BABAX/LR42//BABAX*2/5/QUELEA	CMSS11Y01160T-099TOPM-099Y-099M-099NJ-099NJ-14WGY-0B
7400441	MXI15-16\M50IBW/M34SA\348	WBLL1*2/BRAMBLING/4/BABAX/LR42//BABAX*2/3/SHAMA*2/5/PBW343*2/KUKUNA*2//FRTL/PIFED	CMSS11Y01216T-099TOPM-099Y-099M-099NJ-099NJ-6WGY-0B
7400442	MXI15-16\M50IBW/M34SA\349	WBLL1*2/BRAMBLING/4/BABAX/LR42//BABAX*2/3/SHAMA*2/5/PBW343*2/KUKUNA*2//FRTL/PIFED	CMSS11Y01216T-099TOPM-099Y-099M-099NJ-099NJ-10WGY-0B
7400446	MXI15-16\M50IBW/M34SA\351	WBLL1*2/BRAMBLING/4/BABAX/LR42//BABAX*2/3/SHAMA*2/5/PBW343*2/KUKUNA*2//FRTL/PIFED	CMSS11Y01216T-099TOPM-099Y-099M-099NJ-099NJ-21WGY-0B
7400456	MXI15-16\M50IBW/M34SA\354	THELIN/2*WBLL1/5/KAUZ//ALTAR 84/AOS/3/KAUZ/4/SW94.15464/6/2*UP2338*2/SHAMA/3/MILAN/KAUZ//CHIL/CHUM18/4/UP2338*2/SHAMA	CMSS11Y01218T-099TOPM-099Y-099M-099NJ-099NJ-6WGY-0B
7400458	MXI15-16\M50IBW/M34SA\356	THELIN/2*WBLL1/5/KAUZ//ALTAR 84/AOS/3/KAUZ/4/SW94.15464/6/2*UP2338*2/SHAMA/3/MILAN/KAUZ//CHIL/CHUM18/4/UP2338*2/SHAMA	CMSS11Y01218T-099TOPM-099Y-099M-099NJ-099NJ-8WGY-0B
7400460	MXI15-16\M50IBW/M34SA\358	THELIN/2*WBLL1/5/KAUZ//ALTAR 84/AOS/3/KAUZ/4/SW94.15464/6/2*UP2338*2/SHAMA/3/MILAN/KAUZ//CHIL/CHUM18/4/UP2338*2/SHAMA	CMSS11Y01218T-099TOPM-099Y-099M-099NJ-099NJ-21WGY-0B
7400467	MXI15-16\M50IBW/M34SA\360	THELIN/2*WBLL1/5/KAUZ//ALTAR 84/AOS/3/KAUZ/4/SW94.15464/6/2*UP2338*2/SHAMA/3/MILAN/KAUZ//CHIL/CHUM18/4/UP2338*2/SHAMA	CMSS11Y01218T-099TOPM-099Y-099M-099NJ-099NJ-41WGY-0B
7400488	MXI15-16\M50IBW/M34SA\364	KFA/5/REH/HARE//2*BCN/3/CROC_1/AE.SQUARROSA (213)//PGO/4/HUITES/6/REH/HARE//2*BCN/3/CROC_1/AE.SQUARROSA (213)//PGO/4/HUITES/7/BOKOTA/8/BOKOTA	CMSS11Y01221T-099TOPM-099Y-099M-099NJ-099NJ-7WGY-0B
7400491	MXI15-16\M50IBW/M34SA\366	KFA/5/REH/HARE//2*BCN/3/CROC_1/AE.SQUARROSA (213)//PGO/4/HUITES/6/REH/HARE//2*BCN/3/CROC_1/AE.SQUARROSA (213)//PGO/4/HUITES/7/BOKOTA/8/BOKOTA	CMSS11Y01221T-099TOPM-099Y-099M-099NJ-099NJ-17WGY-0B
7400579	MXI15-16\M50IBW/M34SA\801	BABAX/LR42//BABAX/3/ER2000/4/NIGHAR	CMSA11Y00308S-099Y-099M-099NJ-099NJ-4WGY-0B
7400595	MXI15-16\M50IBW/M34SA\806	BABAX/LR42//BABAX/3/ER2000/5/GK ARON/AG SECO 7846//2180/4/2*MILAN/KAUZ//PRINIA/3/BAV92	CMSA11Y00323S-099Y-099M-099NJ-099NJ-1WGY-0B
7400602	MXI15-16\M50IBW/M34SA\809	TC870344/GUI//TEMPORALERA M 87/AGR/3/2*WBLL1/8/BOW/VEE/5/ND/VG9144//KAL/BB/3/YACO/4/CHIL/6/CASKOR/3/CROC_1/AE.SQUARROSA (224)//OPATA/7/PASTOR//MILAN/KAUZ/3/BAV92	CMSA11Y00336S-099Y-099M-099NJ-099NJ-12WGY-0B
7400624	MXI15-16\M50IBW/M34SA\810	SOKOLL/3/PASTOR//HXL7573/2*BAU/4/PANDION//FILIN/2*PASTOR/3/BERKUT	CMSA11Y00364S-099Y-099M-099NJ-099NJ-7WGY-0B
7400679	MXI15-16\M50IBW/M34SA\825	W15.92/4/PASTOR//HXL7573/2*BAU/3/WBLL1/7/CNO79//PF70354/MUS/3/PASTOR/4/BAV92/5/FRET2/KUKUNA//FRET2/6/MILAN/KAUZ//PRINIA/3/BAV92	CMSA11Y00394S-099Y-099M-099NJ-099NJ-6WGY-0B
7400700	MXI15-16\M50IBW/M34SA\828	MEX94.27.1.20/3/SOKOLL//ATTILA/3*BCN/5/GK ARON/AG SECO 7846//2180/4/2*MILAN/KAUZ//PRINIA/3/BAV92	CMSA11Y00417S-099Y-099M-099NJ-099NJ-2WGY-0B
7400704	MXI15-16\M50IBW/M34SA\832	PBW343/TONI//ELVIRA/7/CNO79//PF70354/MUS/3/PASTOR/4/BAV92/5/FRET2/KUKUNA//FRET2/6/MILAN/KAUZ//PRINIA/3/BAV92	CMSA11Y00427S-099Y-099M-099NJ-099NJ-1WGY-0B
7400738	MXI15-16\M50IBW/M34SA\839	WHEAR/SOKOLL/8/BOW/VEE/5/ND/VG9144//KAL/BB/3/YACO/4/CHIL/6/CASKOR/3/CROC_1/AE.SQUARROSA (224)//OPATA/7/PASTOR//MILAN/KAUZ/3/BAV92	CMSA11Y00467S-099Y-099M-099NJ-099NJ-12WGY-0B
7400748	MXI15-16\M50IBW/M34SA\844	SUP152/6/OASIS/5*BORL95/5/CNDO/R143//ENTE/MEXI75/3/AE.SQ/4/2*OCI	CMSA11Y00485S-099Y-099M-099NJ-099NJ-22WGY-0B
7400754	MXI15-16\M50IBW/M34SA\848	SUP152/5/CHRZ//BOW/CROW/3/WBLL1/4/CROC_1/AE.SQUARROSA (213)//PGO	CMSA11Y00489S-099Y-099M-099NJ-099NJ-5WGY-0B
7400769	MXI15-16\M50IBW/M34SA\854	NELOKI//SOKOLL/EXCALIBUR	CMSA11Y00507S-099Y-099M-099NJ-099NJ-19WGY-0B
7400771	MXI15-16\M50IBW/M34SA\856	NELOKI//SOKOLL/EXCALIBUR	CMSA11Y00507S-099Y-099M-099NJ-099NJ-25WGY-0B
7400794	MXI15-16\M50IBW/M34SA\780	LIVINGSTON/6/2*MTRWA92.161/PRINIA/5/SERI*3//RL6010/4*YR/3/PASTOR/4/BAV92	CMSA11Y00084T-099B-099Y-099M-099NJ-099NJ-4WGY-0B
