# Supplementary material for: Elucidating SNP-based genetic diversity and population structure of advanced breeding lines of bread wheat (Triticum aestivum L.)
Source: PeerJ. 2021 Jun 22;9:e11593. doi: 10.7717/peerj.11593 (PMC8231316; doi:10.7717/peerj.11593)
Supplement: Supplemental Information 2 [file peerj-09-11593-s002.xlsx]

## Sheet: summary_SNP
Site Name	Chromosome	Physical Position	Major Allele	Major Allele Gametes	Major Allele Frequency	Minor Allele	Minor Allele Gametes	Minor Allele Frequency	Number Heterozygous	Proportion Heterozygous	PIC
S1A_1145442	1A	1145442	A	260	0.922	G	22	0.078	2	0.014	0.123
S1A_1158042	1A	1158042	T	244	0.865	C	38	0.135	2	0.014	0.179
S1A_1158055	1A	1158055	G	266	0.943	T	16	0.057	0	0	0.096
S1A_1238021	1A	1238021	T	266	0.943	C	16	0.057	0	0	0.096
S1A_1238114	1A	1238114	G	266	0.943	A	16	0.057	0	0	0.096
S1A_1588248	1A	1588248	G	246	0.872	A	36	0.128	2	0.014	0.173
S1A_1698908	1A	1698908	G	266	0.943	T	16	0.057	0	0	0.096
S1A_1846791	1A	1846791	G	266	0.943	A	16	0.057	0	0	0.096
S1A_1846793	1A	1846793	C	246	0.872	G	36	0.128	2	0.014	0.173
S1A_1989314	1A	1989314	C	246	0.872	G	36	0.128	2	0.014	0.173
S1A_2075567	1A	2075567	C	246	0.872	A	36	0.128	2	0.014	0.173
S1A_2185113	1A	2185113	A	266	0.943	G	16	0.057	0	0	0.096
S1A_2276934	1A	2276934	A	238	0.844	C	44	0.156	2	0.014	0.194
S1A_3218479	1A	3218479	T	255	0.904	G	27	0.096	7	0.05	0.143
S1A_3452684	1A	3452684	C	265	0.94	T	17	0.06	1	0.007	0.1
S1A_3469197	1A	3469197	A	241	0.855	C	41	0.145	1	0.007	0.187
S1A_3517435	1A	3517435	C	186	0.66	G	96	0.34	0	0	0.247
S1A_3613321	1A	3613321	C	172	0.61	T	110	0.39	4	0.028	0.249
S1A_3613616	1A	3613616	T	175	0.621	C	107	0.379	1	0.007	0.249
S1A_3618173	1A	3618173	A	174	0.617	T	108	0.383	2	0.014	0.249
S1A_3776843	1A	3776843	A	176	0.624	G	106	0.376	0	0	0.249
S1A_3878168	1A	3878168	G	193	0.684	T	89	0.316	1	0.007	0.245
S1A_3943497	1A	3943497	A	166	0.589	G	116	0.411	2	0.014	0.25
S1A_4159194	1A	4159194	A	261	0.926	G	21	0.074	1	0.007	0.119
S1A_4206845	1A	4206845	C	265	0.94	T	17	0.06	1	0.007	0.1
S1A_4227065	1A	4227065	T	174	0.617	C	108	0.383	6	0.043	0.249
S1A_4260312	1A	4260312	T	171	0.606	C	111	0.394	3	0.021	0.249
S1A_4363168	1A	4363168	G	250	0.887	A	32	0.113	8	0.057	0.161
S1A_4697598	1A	4697598	A	188	0.667	T	94	0.333	2	0.014	0.247
S1A_4870377	1A	4870377	A	182	0.645	G	100	0.355	4	0.028	0.248
S1A_5326149	1A	5326149	A	182	0.645	G	100	0.355	2	0.014	0.248
S1A_6370170	1A	6370170	C	160	0.567	T	122	0.433	2	0.014	0.25
S1A_6394480	1A	6394480	C	268	0.95	A	14	0.05	0	0	0.085
S1A_6424350	1A	6424350	G	266	0.943	C	16	0.057	0	0	0.096
S1A_6632531	1A	6632531	T	266	0.943	G	16	0.057	0	0	0.096
S1A_6669808	1A	6669808	G	189	0.67	A	93	0.33	3	0.021	0.247
S1A_7214024	1A	7214024	G	183	0.649	A	99	0.351	3	0.021	0.248
S1A_7274964	1A	7274964	T	159	0.564	C	123	0.436	3	0.021	0.25
S1A_7281143	1A	7281143	G	268	0.95	A	14	0.05	0	0	0.085
S1A_7285648	1A	7285648	C	268	0.95	T	14	0.05	0	0	0.085
S1A_7315187	1A	7315187	G	266	0.943	A	16	0.057	0	0	0.096
S1A_7658855	1A	7658855	G	266	0.943	A	16	0.057	0	0	0.096
S1A_7798151	1A	7798151	C	195	0.691	T	87	0.309	3	0.021	0.245
S1A_8118239	1A	8118239	G	268	0.95	A	14	0.05	0	0	0.085
S1A_8152172	1A	8152172	G	268	0.95	T	14	0.05	0	0	0.085
S1A_8295817	1A	8295817	C	196	0.695	T	86	0.305	4	0.028	0.244
S1A_8516115	1A	8516115	G	191	0.677	C	91	0.323	5	0.035	0.246
S1A_8575021	1A	8575021	A	191	0.677	T	91	0.323	5	0.035	0.246
S1A_8612196	1A	8612196	G	196	0.695	C	86	0.305	4	0.028	0.244
S1A_8633935	1A	8633935	C	268	0.95	G	14	0.05	0	0	0.085
S1A_8668416	1A	8668416	G	268	0.95	A	14	0.05	0	0	0.085
S1A_9104582	1A	9104582	C	193	0.684	G	89	0.316	5	0.035	0.245
S1A_9236507	1A	9236507	C	268	0.95	G	14	0.05	0	0	0.085
S1A_9236518	1A	9236518	A	194	0.688	T	88	0.312	4	0.028	0.245
S1A_9565863	1A	9565863	A	159	0.564	G	123	0.436	5	0.035	0.25
S1A_9600655	1A	9600655	C	252	0.894	A	30	0.106	2	0.014	0.154
S1A_9940159	1A	9940159	C	216	0.766	A	66	0.234	2	0.014	0.23
S1A_9968663	1A	9968663	T	185	0.656	C	97	0.344	7	0.05	0.248
S1A_9973206	1A	9973206	A	205	0.727	T	77	0.273	7	0.05	0.239
S1A_9973314	1A	9973314	A	184	0.652	G	98	0.348	6	0.043	0.248
S1A_10072236	1A	10072236	G	216	0.766	A	66	0.234	4	0.028	0.23
S1A_10122159	1A	10122159	G	219	0.777	A	63	0.223	1	0.007	0.227
S1A_10214692	1A	10214692	T	181	0.642	A	101	0.358	3	0.021	0.248
S1A_10223986	1A	10223986	T	165	0.585	C	117	0.415	5	0.035	0.25
S1A_10423260	1A	10423260	G	165	0.585	A	117	0.415	5	0.035	0.25
S1A_10605061	1A	10605061	G	165	0.585	A	117	0.415	5	0.035	0.25
S1A_10714750	1A	10714750	G	215	0.762	A	67	0.238	3	0.021	0.231
S1A_10743206	1A	10743206	G	175	0.621	A	107	0.379	9	0.064	0.249
S1A_11207693	1A	11207693	C	177	0.628	T	105	0.372	7	0.05	0.249
S1A_11207721	1A	11207721	G	255	0.904	A	27	0.096	1	0.007	0.143
S1A_11530713	1A	11530713	C	259	0.918	G	23	0.082	1	0.007	0.127
S1A_11718307	1A	11718307	G	215	0.762	A	67	0.238	3	0.021	0.231
S1A_11718370	1A	11718370	C	215	0.762	G	67	0.238	3	0.021	0.231
S1A_12113521	1A	12113521	C	214	0.759	A	68	0.241	4	0.028	0.232
S1A_12115889	1A	12115889	A	215	0.762	G	67	0.238	3	0.021	0.231
S1A_12142757	1A	12142757	A	204	0.723	G	78	0.277	2	0.014	0.24
S1A_12502801	1A	12502801	C	210	0.745	A	72	0.255	2	0.014	0.236
S1A_12502888	1A	12502888	C	210	0.745	T	72	0.255	2	0.014	0.236
S1A_12818490	1A	12818490	C	210	0.745	T	72	0.255	2	0.014	0.236
S1A_13829899	1A	13829899	C	266	0.943	T	16	0.057	0	0	0.096
S1A_13844180	1A	13844180	T	268	0.95	C	14	0.05	0	0	0.085
S1A_13857646	1A	13857646	T	210	0.745	C	72	0.255	2	0.014	0.236
S1A_13860080	1A	13860080	C	210	0.745	T	72	0.255	2	0.014	0.236
S1A_13940776	1A	13940776	C	210	0.745	G	72	0.255	2	0.014	0.236
S1A_13971883	1A	13971883	C	210	0.745	T	72	0.255	2	0.014	0.236
S1A_14050313	1A	14050313	C	208	0.738	T	74	0.262	2	0.014	0.237
S1A_14054989	1A	14054989	C	208	0.738	T	74	0.262	2	0.014	0.237
S1A_14065650	1A	14065650	A	208	0.738	C	74	0.262	2	0.014	0.237
S1A_14161137	1A	14161137	G	208	0.738	C	74	0.262	2	0.014	0.237
S1A_14161172	1A	14161172	A	208	0.738	G	74	0.262	2	0.014	0.237
S1A_14468568	1A	14468568	C	259	0.918	A	23	0.082	1	0.007	0.127
S1A_14520365	1A	14520365	A	259	0.918	G	23	0.082	1	0.007	0.127
S1A_14520449	1A	14520449	G	208	0.738	T	74	0.262	2	0.014	0.237
S1A_14520452	1A	14520452	C	262	0.929	G	20	0.071	2	0.014	0.114
S1A_14551224	1A	14551224	C	259	0.918	T	23	0.082	1	0.007	0.127
S1A_15244170	1A	15244170	G	259	0.918	A	23	0.082	1	0.007	0.127
S1A_15244407	1A	15244407	G	259	0.918	C	23	0.082	1	0.007	0.127
S1A_15325346	1A	15325346	T	263	0.933	C	19	0.067	1	0.007	0.11
S1A_15345707	1A	15345707	G	208	0.738	C	74	0.262	2	0.014	0.237
S1A_15513597	1A	15513597	A	185	0.656	G	97	0.344	3	0.021	0.248
S1A_15519432	1A	15519432	A	253	0.897	T	29	0.103	3	0.021	0.15
S1A_15807361	1A	15807361	C	212	0.752	G	70	0.248	14	0.099	0.234
S1A_16192594	1A	16192594	G	207	0.734	A	75	0.266	3	0.021	0.238
S1A_16192611	1A	16192611	G	262	0.929	T	20	0.071	2	0.014	0.114
S1A_16306070	1A	16306070	G	262	0.929	A	20	0.071	2	0.014	0.114
S1A_16417367	1A	16417367	G	207	0.734	C	75	0.266	5	0.035	0.238
S1A_16914205	1A	16914205	T	209	0.741	C	73	0.259	3	0.021	0.236
S1A_16933262	1A	16933262	G	228	0.809	A	54	0.191	4	0.028	0.214
S1A_16933279	1A	16933279	A	209	0.741	G	73	0.259	3	0.021	0.236
S1A_17008847	1A	17008847	T	209	0.741	C	73	0.259	3	0.021	0.236
S1A_17103665	1A	17103665	C	209	0.741	T	73	0.259	3	0.021	0.236
S1A_17103674	1A	17103674	C	155	0.55	G	127	0.45	3	0.021	0.25
S1A_17239750	1A	17239750	A	239	0.848	C	43	0.152	7	0.05	0.192
S1A_20237406	1A	20237406	G	206	0.73	A	76	0.27	4	0.028	0.239
S1A_20237445	1A	20237445	C	206	0.73	G	76	0.27	4	0.028	0.239
S1A_20420194	1A	20420194	A	172	0.61	T	110	0.39	4	0.028	0.249
S1A_20697903	1A	20697903	C	248	0.879	T	34	0.121	2	0.014	0.167
S1A_20886731	1A	20886731	A	250	0.887	G	32	0.113	2	0.014	0.161
S1A_20907484	1A	20907484	G	197	0.699	A	85	0.301	5	0.035	0.244
S1A_22598779	1A	22598779	T	267	0.947	C	15	0.053	1	0.007	0.091
S1A_22642655	1A	22642655	T	263	0.933	C	19	0.067	1	0.007	0.11
S1A_22643118	1A	22643118	C	267	0.947	T	15	0.053	1	0.007	0.091
S1A_22652361	1A	22652361	G	262	0.929	T	20	0.071	0	0	0.114
S1A_22664724	1A	22664724	G	262	0.929	A	20	0.071	0	0	0.114
S1A_22852983	1A	22852983	A	170	0.603	G	112	0.397	6	0.043	0.25
S1A_22853010	1A	22853010	A	170	0.603	T	112	0.397	6	0.043	0.25
S1A_22869036	1A	22869036	T	170	0.603	C	112	0.397	4	0.028	0.25
S1A_22922588	1A	22922588	C	168	0.596	T	114	0.404	4	0.028	0.25
S1A_23302883	1A	23302883	G	203	0.72	A	79	0.28	7	0.05	0.241
S1A_23342045	1A	23342045	T	203	0.72	C	79	0.28	7	0.05	0.241
S1A_23442329	1A	23442329	C	170	0.603	T	112	0.397	6	0.043	0.25
S1A_23833017	1A	23833017	C	168	0.596	A	114	0.404	6	0.043	0.25
S1A_23850918	1A	23850918	G	169	0.599	T	113	0.401	7	0.05	0.25
S1A_24247126	1A	24247126	C	250	0.887	T	32	0.113	4	0.028	0.161
S1A_24434608	1A	24434608	T	248	0.879	C	34	0.121	4	0.028	0.167
S1A_24434623	1A	24434623	G	252	0.894	A	30	0.106	4	0.028	0.154
S1A_24545871	1A	24545871	C	259	0.918	T	23	0.082	3	0.021	0.127
S1A_25490035	1A	25490035	G	248	0.879	A	34	0.121	4	0.028	0.167
S1A_25807483	1A	25807483	C	247	0.876	T	35	0.124	3	0.021	0.17
S1A_25938292	1A	25938292	C	249	0.883	T	33	0.117	3	0.021	0.164
S1A_26318712	1A	26318712	A	248	0.879	C	34	0.121	4	0.028	0.167
S1A_26598498	1A	26598498	T	248	0.879	C	34	0.121	4	0.028	0.167
S1A_27209346	1A	27209346	A	186	0.66	G	96	0.34	8	0.057	0.247
S1A_27257601	1A	27257601	T	149	0.528	A	133	0.472	7	0.05	0.25
S1A_27512785	1A	27512785	G	215	0.762	A	67	0.238	3	0.021	0.231
S1A_27513529	1A	27513529	C	224	0.794	T	58	0.206	2	0.014	0.22
S1A_28366623	1A	28366623	T	222	0.787	C	60	0.213	2	0.014	0.223
S1A_28762153	1A	28762153	G	226	0.801	C	56	0.199	2	0.014	0.217
S1A_29116428	1A	29116428	G	146	0.518	A	136	0.482	4	0.028	0.25
S1A_29116815	1A	29116815	A	229	0.812	G	53	0.188	1	0.007	0.212
S1A_29122284	1A	29122284	C	146	0.518	T	136	0.482	4	0.028	0.25
S1A_29187033	1A	29187033	C	227	0.805	G	55	0.195	1	0.007	0.215
S1A_29799231	1A	29799231	C	142	0.504	T	140	0.496	4	0.028	0.25
S1A_29804996	1A	29804996	C	142	0.504	T	140	0.496	4	0.028	0.25
S1A_29887344	1A	29887344	A	148	0.525	G	134	0.475	4	0.028	0.25
S1A_29887464	1A	29887464	C	144	0.511	T	138	0.489	4	0.028	0.25
S1A_30015422	1A	30015422	A	141	0.5	G	141	0.5	5	0.035	0.25
S1A_30114974	1A	30114974	A	141	0.5	G	141	0.5	5	0.035	0.25
S1A_30115042	1A	30115042	A	141	0.5	G	141	0.5	5	0.035	0.25
S1A_30118731	1A	30118731	G	145	0.514	A	137	0.486	5	0.035	0.25
S1A_30190358	1A	30190358	T	228	0.809	G	54	0.191	2	0.014	0.214
S1A_30307305	1A	30307305	T	222	0.787	A	60	0.213	2	0.014	0.223
S1A_30332610	1A	30332610	C	195	0.691	T	87	0.309	5	0.035	0.245
S1A_30334580	1A	30334580	C	195	0.691	G	87	0.309	5	0.035	0.245
S1A_30336747	1A	30336747	G	189	0.67	A	93	0.33	5	0.035	0.247
S1A_30404292	1A	30404292	G	222	0.787	A	60	0.213	2	0.014	0.223
S1A_30775021	1A	30775021	A	189	0.67	C	93	0.33	5	0.035	0.247
S1A_31176211	1A	31176211	A	194	0.688	G	88	0.312	6	0.043	0.245
S1A_31346621	1A	31346621	A	146	0.518	C	136	0.482	6	0.043	0.25
S1A_31790948	1A	31790948	G	195	0.691	A	87	0.309	5	0.035	0.245
S1A_31891186	1A	31891186	C	229	0.812	T	53	0.188	3	0.021	0.212
S1A_31918093	1A	31918093	G	225	0.798	A	57	0.202	1	0.007	0.219
S1A_31974210	1A	31974210	G	216	0.766	A	66	0.234	8	0.057	0.23
S1A_32111351	1A	32111351	C	146	0.518	T	136	0.482	6	0.043	0.25
S1A_32282143	1A	32282143	A	222	0.787	G	60	0.213	2	0.014	0.223
S1A_32471115	1A	32471115	A	147	0.521	G	135	0.479	5	0.035	0.25
S1A_32859095	1A	32859095	A	147	0.521	G	135	0.479	5	0.035	0.25
S1A_32900928	1A	32900928	A	152	0.539	G	130	0.461	4	0.028	0.25
S1A_33084112	1A	33084112	G	152	0.539	A	130	0.461	4	0.028	0.25
S1A_33219514	1A	33219514	T	152	0.539	C	130	0.461	4	0.028	0.25
S1A_33755557	1A	33755557	T	152	0.539	C	130	0.461	4	0.028	0.25
S1A_41054531	1A	41054531	G	145	0.514	T	137	0.486	5	0.035	0.25
S1A_41368108	1A	41368108	G	249	0.883	T	33	0.117	3	0.021	0.164
S1A_41375014	1A	41375014	A	158	0.56	G	124	0.44	8	0.057	0.25
S1A_41916355	1A	41916355	A	235	0.833	G	47	0.167	3	0.021	0.201
S1A_42151448	1A	42151448	G	243	0.862	A	39	0.138	1	0.007	0.182
S1A_45588946	1A	45588946	C	241	0.855	T	41	0.145	1	0.007	0.187
S1A_45592345	1A	45592345	C	241	0.855	G	41	0.145	1	0.007	0.187
S1A_46222311	1A	46222311	C	257	0.911	A	25	0.089	1	0.007	0.135
S1A_46442544	1A	46442544	G	257	0.911	A	25	0.089	1	0.007	0.135
S1A_47521369	1A	47521369	T	259	0.918	C	23	0.082	1	0.007	0.127
S1A_47581359	1A	47581359	T	257	0.911	A	25	0.089	1	0.007	0.135
S1A_48769407	1A	48769407	T	245	0.869	A	37	0.131	3	0.021	0.176
S1A_48793364	1A	48793364	T	262	0.929	G	20	0.071	0	0	0.114
S1A_48998793	1A	48998793	C	260	0.922	T	22	0.078	0	0	0.123
S1A_49153543	1A	49153543	T	260	0.922	G	22	0.078	0	0	0.123
S1A_49154769	1A	49154769	C	262	0.929	T	20	0.071	0	0	0.114
S1A_49239494	1A	49239494	T	260	0.922	A	22	0.078	0	0	0.123
S1A_49245431	1A	49245431	G	253	0.897	A	29	0.103	1	0.007	0.15
S1A_49245501	1A	49245501	A	262	0.929	C	20	0.071	0	0	0.114
S1A_49281757	1A	49281757	T	262	0.929	C	20	0.071	0	0	0.114
S1A_49891048	1A	49891048	T	265	0.94	C	17	0.06	1	0.007	0.1
S1A_465614616	1A	465614616	T	195	0.691	G	87	0.309	3	0.021	0.245
S1A_466927662	1A	466927662	G	206	0.73	A	76	0.27	2	0.014	0.239
S1A_471700659	1A	471700659	C	206	0.73	T	76	0.27	2	0.014	0.239
S1A_471700717	1A	471700717	G	205	0.727	C	77	0.273	1	0.007	0.239
S1A_471795882	1A	471795882	C	208	0.738	T	74	0.262	2	0.014	0.237
S1A_474299901	1A	474299901	A	202	0.716	G	80	0.284	4	0.028	0.241
S1A_475625599	1A	475625599	G	209	0.741	A	73	0.259	3	0.021	0.236
S1A_475625631	1A	475625631	A	198	0.702	G	84	0.298	4	0.028	0.243
S1A_475708681	1A	475708681	C	210	0.745	G	72	0.255	2	0.014	0.236
S1A_475913201	1A	475913201	C	225	0.798	T	57	0.202	3	0.021	0.219
S1A_476172719	1A	476172719	C	198	0.702	G	84	0.298	2	0.014	0.243
S1A_477355273	1A	477355273	A	242	0.858	C	40	0.142	0	0	0.184
S1A_477699717	1A	477699717	G	209	0.741	C	73	0.259	1	0.007	0.236
S1A_477728609	1A	477728609	A	198	0.702	T	84	0.298	2	0.014	0.243
S1A_477937227	1A	477937227	C	208	0.738	T	74	0.262	2	0.014	0.237
S1A_479840228	1A	479840228	C	207	0.734	T	75	0.266	3	0.021	0.238
S1A_480551334	1A	480551334	G	207	0.734	A	75	0.266	3	0.021	0.238
S1A_480826969	1A	480826969	A	207	0.734	G	75	0.266	3	0.021	0.238
S1A_480934170	1A	480934170	T	207	0.734	C	75	0.266	3	0.021	0.238
S1A_481518816	1A	481518816	T	198	0.702	C	84	0.298	4	0.028	0.243
S1A_481757962	1A	481757962	T	198	0.702	C	84	0.298	4	0.028	0.243
S1A_481771203	1A	481771203	G	198	0.702	T	84	0.298	4	0.028	0.243
S1A_482770001	1A	482770001	C	198	0.702	T	84	0.298	4	0.028	0.243
S1A_482824074	1A	482824074	T	209	0.741	A	73	0.259	3	0.021	0.236
S1A_483674978	1A	483674978	G	210	0.745	A	72	0.255	4	0.028	0.236
S1A_484300594	1A	484300594	G	199	0.706	T	83	0.294	5	0.035	0.243
S1A_487470938	1A	487470938	C	200	0.709	A	82	0.291	2	0.014	0.242
S1A_487471000	1A	487471000	G	216	0.766	C	66	0.234	4	0.028	0.23
S1A_488191439	1A	488191439	T	261	0.926	C	21	0.074	1	0.007	0.119
S1A_488217958	1A	488217958	G	261	0.926	A	21	0.074	1	0.007	0.119
S1A_488233689	1A	488233689	G	261	0.926	C	21	0.074	1	0.007	0.119
S1A_488818685	1A	488818685	G	261	0.926	A	21	0.074	1	0.007	0.119
S1A_489286099	1A	489286099	T	227	0.805	C	55	0.195	1	0.007	0.215
S1A_489356628	1A	489356628	C	227	0.805	G	55	0.195	1	0.007	0.215
S1A_489642593	1A	489642593	G	227	0.805	A	55	0.195	1	0.007	0.215
S1A_490469677	1A	490469677	G	226	0.801	A	56	0.199	2	0.014	0.217
S1A_492023268	1A	492023268	T	226	0.801	C	56	0.199	2	0.014	0.217
S1A_492060934	1A	492060934	A	226	0.801	C	56	0.199	2	0.014	0.217
S1A_492065547	1A	492065547	T	230	0.816	G	52	0.184	2	0.014	0.21
S1A_492619697	1A	492619697	G	226	0.801	C	56	0.199	2	0.014	0.217
S1A_493823499	1A	493823499	T	231	0.819	C	51	0.181	1	0.007	0.209
S1A_494392059	1A	494392059	C	231	0.819	G	51	0.181	1	0.007	0.209
S1A_494393037	1A	494393037	A	231	0.819	G	51	0.181	1	0.007	0.209
S1A_495192503	1A	495192503	A	231	0.819	G	51	0.181	1	0.007	0.209
S1A_495283626	1A	495283626	T	231	0.819	C	51	0.181	1	0.007	0.209
S1A_495448699	1A	495448699	T	233	0.826	C	49	0.174	1	0.007	0.205
S1A_495668940	1A	495668940	A	233	0.826	T	49	0.174	1	0.007	0.205
S1A_496648634	1A	496648634	A	217	0.769	G	65	0.231	3	0.021	0.229
S1A_496648729	1A	496648729	C	217	0.769	T	65	0.231	3	0.021	0.229
S1A_497201550	1A	497201550	C	204	0.723	T	78	0.277	4	0.028	0.24
S1A_497201682	1A	497201682	G	204	0.723	A	78	0.277	4	0.028	0.24
S1A_498287359	1A	498287359	A	201	0.713	G	81	0.287	3	0.021	0.242
S1A_498539597	1A	498539597	C	201	0.713	T	81	0.287	3	0.021	0.242
S1A_499227322	1A	499227322	A	201	0.713	G	81	0.287	3	0.021	0.242
S1A_499840870	1A	499840870	T	201	0.713	C	81	0.287	3	0.021	0.242
S1A_499864157	1A	499864157	T	201	0.713	C	81	0.287	3	0.021	0.242
S1A_499864420	1A	499864420	G	201	0.713	C	81	0.287	3	0.021	0.242
S1A_499864432	1A	499864432	C	201	0.713	G	81	0.287	3	0.021	0.242
S1A_500074551	1A	500074551	T	201	0.713	C	81	0.287	3	0.021	0.242
S1A_500842256	1A	500842256	G	201	0.713	C	81	0.287	3	0.021	0.242
S1A_500980841	1A	500980841	T	205	0.727	C	77	0.273	3	0.021	0.239
S1A_501121082	1A	501121082	G	203	0.72	T	79	0.28	3	0.021	0.241
S1A_502614974	1A	502614974	G	266	0.943	A	16	0.057	2	0.014	0.096
S1A_502682678	1A	502682678	G	222	0.787	A	60	0.213	2	0.014	0.223
S1A_503324859	1A	503324859	G	266	0.943	A	16	0.057	2	0.014	0.096
S1A_503381311	1A	503381311	C	204	0.723	A	78	0.277	2	0.014	0.24
S1A_503725665	1A	503725665	C	266	0.943	T	16	0.057	2	0.014	0.096
S1A_504090012	1A	504090012	G	266	0.943	A	16	0.057	2	0.014	0.096
S1A_504243481	1A	504243481	A	220	0.78	G	62	0.22	2	0.014	0.225
S1A_504420080	1A	504420080	C	220	0.78	G	62	0.22	2	0.014	0.225
S1A_505490303	1A	505490303	G	222	0.787	A	60	0.213	2	0.014	0.223
S1A_506485921	1A	506485921	T	217	0.769	C	65	0.231	3	0.021	0.229
S1A_506540291	1A	506540291	C	217	0.769	T	65	0.231	3	0.021	0.229
S1A_506667493	1A	506667493	G	217	0.769	A	65	0.231	3	0.021	0.229
S1A_506671630	1A	506671630	C	217	0.769	A	65	0.231	3	0.021	0.229
S1A_507956069	1A	507956069	A	215	0.762	C	67	0.238	3	0.021	0.231
S1A_507978271	1A	507978271	T	215	0.762	C	67	0.238	3	0.021	0.231
S1A_508047046	1A	508047046	T	215	0.762	A	67	0.238	3	0.021	0.231
S1A_508184636	1A	508184636	T	200	0.709	C	82	0.291	2	0.014	0.242
S1A_508571601	1A	508571601	G	215	0.762	T	67	0.238	3	0.021	0.231
S1A_508571657	1A	508571657	A	215	0.762	G	67	0.238	3	0.021	0.231
S1A_508720387	1A	508720387	C	215	0.762	G	67	0.238	3	0.021	0.231
S1A_508723994	1A	508723994	T	215	0.762	G	67	0.238	3	0.021	0.231
S1A_509676242	1A	509676242	A	196	0.695	G	86	0.305	2	0.014	0.244
S1A_510281396	1A	510281396	A	195	0.691	G	87	0.309	3	0.021	0.245
S1A_510292911	1A	510292911	C	195	0.691	A	87	0.309	3	0.021	0.245
S1A_510830701	1A	510830701	A	195	0.691	G	87	0.309	3	0.021	0.245
S1A_510983454	1A	510983454	A	195	0.691	G	87	0.309	3	0.021	0.245
S1A_511620619	1A	511620619	C	216	0.766	T	66	0.234	4	0.028	0.23
S1A_511632612	1A	511632612	C	259	0.918	G	23	0.082	1	0.007	0.127
S1A_511633074	1A	511633074	C	259	0.918	T	23	0.082	1	0.007	0.127
S1A_512475800	1A	512475800	T	261	0.926	C	21	0.074	1	0.007	0.119
S1A_512475885	1A	512475885	C	261	0.926	T	21	0.074	1	0.007	0.119
S1A_512491739	1A	512491739	G	216	0.766	A	66	0.234	4	0.028	0.23
S1A_512491747	1A	512491747	G	261	0.926	C	21	0.074	1	0.007	0.119
S1A_512496668	1A	512496668	G	261	0.926	A	21	0.074	1	0.007	0.119
S1A_512666143	1A	512666143	G	267	0.947	A	15	0.053	1	0.007	0.091
S1A_512858178	1A	512858178	T	259	0.918	C	23	0.082	1	0.007	0.127
S1A_512885554	1A	512885554	C	259	0.918	A	23	0.082	1	0.007	0.127
S1A_513209096	1A	513209096	G	261	0.926	A	21	0.074	1	0.007	0.119
S1A_513660886	1A	513660886	C	262	0.929	T	20	0.071	0	0	0.114
S1A_513881195	1A	513881195	G	262	0.929	A	20	0.071	0	0	0.114
S1A_514257341	1A	514257341	C	262	0.929	A	20	0.071	0	0	0.114
S1A_514667179	1A	514667179	A	198	0.702	G	84	0.298	4	0.028	0.243
S1A_515662296	1A	515662296	A	198	0.702	G	84	0.298	4	0.028	0.243
S1A_515899480	1A	515899480	C	198	0.702	A	84	0.298	4	0.028	0.243
S1A_515921264	1A	515921264	T	198	0.702	C	84	0.298	4	0.028	0.243
S1A_515960876	1A	515960876	C	198	0.702	T	84	0.298	4	0.028	0.243
S1A_516079891	1A	516079891	C	198	0.702	G	84	0.298	4	0.028	0.243
S1A_516581337	1A	516581337	C	188	0.667	T	94	0.333	4	0.028	0.247
S1A_516584271	1A	516584271	A	188	0.667	T	94	0.333	4	0.028	0.247
S1A_517489486	1A	517489486	C	190	0.674	T	92	0.326	4	0.028	0.246
S1A_517622097	1A	517622097	A	190	0.674	G	92	0.326	4	0.028	0.246
S1A_520010146	1A	520010146	C	159	0.564	T	123	0.436	3	0.021	0.25
S1A_520354078	1A	520354078	C	205	0.727	G	77	0.273	3	0.021	0.239
S1A_520433405	1A	520433405	A	199	0.706	G	83	0.294	3	0.021	0.243
S1A_520433436	1A	520433436	C	207	0.734	T	75	0.266	3	0.021	0.238
S1A_520573048	1A	520573048	C	145	0.514	T	137	0.486	3	0.021	0.25
S1A_520578724	1A	520578724	T	152	0.539	C	130	0.461	2	0.014	0.25
S1A_521227646	1A	521227646	G	218	0.773	C	64	0.227	2	0.014	0.228
S1A_521411860	1A	521411860	G	218	0.773	C	64	0.227	2	0.014	0.228
S1A_521933721	1A	521933721	T	219	0.777	C	63	0.223	3	0.021	0.227
S1A_521977891	1A	521977891	T	219	0.777	C	63	0.223	3	0.021	0.227
S1A_521982343	1A	521982343	G	219	0.777	A	63	0.223	3	0.021	0.227
S1A_521990100	1A	521990100	C	219	0.777	T	63	0.223	3	0.021	0.227
S1A_521991095	1A	521991095	A	219	0.777	G	63	0.223	3	0.021	0.227
S1A_522957155	1A	522957155	A	220	0.78	G	62	0.22	2	0.014	0.225
S1A_525021260	1A	525021260	C	220	0.78	T	62	0.22	2	0.014	0.225
S1A_525329683	1A	525329683	C	220	0.78	T	62	0.22	2	0.014	0.225
S1A_525518699	1A	525518699	C	221	0.784	T	61	0.216	1	0.007	0.224
S1A_526216164	1A	526216164	T	221	0.784	C	61	0.216	1	0.007	0.224
S1A_527676602	1A	527676602	G	221	0.784	A	61	0.216	1	0.007	0.224
S1A_529326562	1A	529326562	C	224	0.794	T	58	0.206	2	0.014	0.22
S1A_530178155	1A	530178155	C	156	0.553	T	126	0.447	2	0.014	0.25
S1A_530232680	1A	530232680	C	156	0.553	T	126	0.447	2	0.014	0.25
S1A_531015728	1A	531015728	C	226	0.801	A	56	0.199	2	0.014	0.217
S1A_531281699	1A	531281699	G	154	0.546	A	128	0.454	2	0.014	0.25
S1A_531373738	1A	531373738	C	146	0.518	G	136	0.482	2	0.014	0.25
S1A_531561588	1A	531561588	A	147	0.521	G	135	0.479	1	0.007	0.25
S1A_531562725	1A	531562725	T	147	0.521	C	135	0.479	1	0.007	0.25
S1A_531680875	1A	531680875	G	149	0.528	A	133	0.472	3	0.021	0.25
S1A_531680970	1A	531680970	G	154	0.546	A	128	0.454	4	0.028	0.25
S1A_531876034	1A	531876034	G	153	0.543	C	129	0.457	3	0.021	0.25
S1A_531878053	1A	531878053	C	149	0.528	G	133	0.472	3	0.021	0.25
S1A_531885906	1A	531885906	A	216	0.766	G	66	0.234	2	0.014	0.23
S1A_531926715	1A	531926715	C	216	0.766	G	66	0.234	2	0.014	0.23
S1A_532107126	1A	532107126	G	153	0.543	T	129	0.457	5	0.035	0.25
S1A_532212451	1A	532212451	C	223	0.791	T	59	0.209	3	0.021	0.221
S1A_532212452	1A	532212452	G	159	0.564	A	123	0.436	5	0.035	0.25
S1A_532212482	1A	532212482	T	159	0.564	C	123	0.436	5	0.035	0.25
S1A_532263105	1A	532263105	T	223	0.791	C	59	0.209	3	0.021	0.221
S1A_532433018	1A	532433018	C	235	0.833	T	47	0.167	3	0.021	0.201
S1A_532487814	1A	532487814	T	144	0.511	C	138	0.489	4	0.028	0.25
S1A_532489535	1A	532489535	A	144	0.511	G	138	0.489	4	0.028	0.25
S1A_532529494	1A	532529494	C	141	0.5	T	141	0.5	5	0.035	0.25
S1A_532644655	1A	532644655	C	226	0.801	T	56	0.199	6	0.043	0.217
S1A_532766638	1A	532766638	C	228	0.809	G	54	0.191	4	0.028	0.214
S1A_532814490	1A	532814490	C	180	0.638	T	102	0.362	2	0.014	0.249
S1A_533284918	1A	533284918	C	224	0.794	G	58	0.206	2	0.014	0.22
S1A_533284954	1A	533284954	C	224	0.794	T	58	0.206	2	0.014	0.22
S1A_533284967	1A	533284967	C	224	0.794	T	58	0.206	2	0.014	0.22
S1A_533670346	1A	533670346	C	213	0.755	T	69	0.245	3	0.021	0.233
S1A_533757468	1A	533757468	A	236	0.837	T	46	0.163	2	0.014	0.198
S1A_533902931	1A	533902931	C	221	0.784	T	61	0.216	3	0.021	0.224
S1A_534055716	1A	534055716	T	219	0.777	C	63	0.223	3	0.021	0.227
S1A_534272127	1A	534272127	A	268	0.95	G	14	0.05	0	0	0.085
S1A_535117335	1A	535117335	G	156	0.553	A	126	0.447	2	0.014	0.25
S1A_535433567	1A	535433567	G	235	0.833	C	47	0.167	1	0.007	0.201
S1A_535734487	1A	535734487	C	254	0.901	G	28	0.099	0	0	0.147
S1A_535858090	1A	535858090	G	225	0.798	A	57	0.202	1	0.007	0.219
S1A_535878341	1A	535878341	G	253	0.897	A	29	0.103	1	0.007	0.15
S1A_535882457	1A	535882457	G	253	0.897	A	29	0.103	1	0.007	0.15
S1A_535896241	1A	535896241	T	265	0.94	A	17	0.06	1	0.007	0.1
S1A_535896242	1A	535896242	T	171	0.606	A	111	0.394	3	0.021	0.249
S1A_535896243	1A	535896243	T	245	0.869	A	37	0.131	1	0.007	0.176
S1A_535952199	1A	535952199	C	245	0.869	T	37	0.131	1	0.007	0.176
S1A_535952223	1A	535952223	C	265	0.94	T	17	0.06	1	0.007	0.1
S1A_535952274	1A	535952274	G	245	0.869	A	37	0.131	1	0.007	0.176
S1A_535952287	1A	535952287	G	265	0.94	T	17	0.06	1	0.007	0.1
S1A_536664231	1A	536664231	G	166	0.589	C	116	0.411	2	0.014	0.25
S1A_536664287	1A	536664287	A	151	0.535	C	131	0.465	3	0.021	0.25
S1A_536955643	1A	536955643	T	263	0.933	C	19	0.067	1	0.007	0.11
S1A_536973335	1A	536973335	A	228	0.809	G	54	0.191	2	0.014	0.214
S1A_537093931	1A	537093931	A	247	0.876	G	35	0.124	1	0.007	0.17
S1A_537541244	1A	537541244	C	247	0.876	T	35	0.124	1	0.007	0.17
S1A_537889237	1A	537889237	C	247	0.876	T	35	0.124	1	0.007	0.17
S1A_537889297	1A	537889297	A	247	0.876	G	35	0.124	1	0.007	0.17
S1A_539737658	1A	539737658	G	232	0.823	C	50	0.177	2	0.014	0.207
S1A_539783455	1A	539783455	C	231	0.819	T	51	0.181	3	0.021	0.209
S1A_539964290	1A	539964290	C	231	0.819	A	51	0.181	3	0.021	0.209
S1A_540136972	1A	540136972	C	169	0.599	T	113	0.401	5	0.035	0.25
S1A_540261150	1A	540261150	T	169	0.599	C	113	0.401	5	0.035	0.25
S1A_540414611	1A	540414611	A	213	0.755	G	69	0.245	1	0.007	0.233
S1A_540551835	1A	540551835	T	213	0.755	C	69	0.245	1	0.007	0.233
S1A_540664712	1A	540664712	T	213	0.755	C	69	0.245	1	0.007	0.233
S1A_540667747	1A	540667747	C	227	0.805	G	55	0.195	1	0.007	0.215
S1A_540674011	1A	540674011	T	227	0.805	C	55	0.195	1	0.007	0.215
S1A_541141903	1A	541141903	A	226	0.801	G	56	0.199	0	0	0.217
S1A_541729095	1A	541729095	A	229	0.812	G	53	0.188	1	0.007	0.212
S1A_541992725	1A	541992725	C	232	0.823	T	50	0.177	2	0.014	0.207
S1A_542180779	1A	542180779	C	218	0.773	T	64	0.227	8	0.057	0.228
S1A_542358705	1A	542358705	G	153	0.543	C	129	0.457	3	0.021	0.25
S1A_542758730	1A	542758730	A	153	0.543	G	129	0.457	1	0.007	0.25
S1A_542763790	1A	542763790	A	154	0.546	G	128	0.454	2	0.014	0.25
S1A_543171656	1A	543171656	A	153	0.543	G	129	0.457	1	0.007	0.25
S1A_543426691	1A	543426691	T	153	0.543	A	129	0.457	1	0.007	0.25
S1A_543830721	1A	543830721	G	153	0.543	T	129	0.457	1	0.007	0.25
S1A_544372287	1A	544372287	T	158	0.56	C	124	0.44	2	0.014	0.25
S1A_544583228	1A	544583228	C	159	0.564	T	123	0.436	3	0.021	0.25
S1A_544706167	1A	544706167	A	237	0.84	G	45	0.16	3	0.021	0.196
S1A_544933520	1A	544933520	G	171	0.606	A	111	0.394	1	0.007	0.249
S1A_545747288	1A	545747288	A	171	0.606	G	111	0.394	1	0.007	0.249
S1A_545762254	1A	545762254	G	161	0.571	A	121	0.429	1	0.007	0.25
S1A_545888499	1A	545888499	C	160	0.567	T	122	0.433	2	0.014	0.25
S1A_545892585	1A	545892585	C	227	0.805	T	55	0.195	1	0.007	0.215
S1A_546031772	1A	546031772	G	227	0.805	T	55	0.195	1	0.007	0.215
S1A_546044944	1A	546044944	G	227	0.805	A	55	0.195	1	0.007	0.215
S1A_546243377	1A	546243377	G	177	0.628	A	105	0.372	1	0.007	0.249
S1A_546508579	1A	546508579	A	227	0.805	G	55	0.195	1	0.007	0.215
S1A_547419510	1A	547419510	A	176	0.624	G	106	0.376	2	0.014	0.249
S1A_547577508	1A	547577508	A	175	0.621	G	107	0.379	3	0.021	0.249
S1A_547599643	1A	547599643	A	175	0.621	T	107	0.379	3	0.021	0.249
S1A_547852316	1A	547852316	T	175	0.621	C	107	0.379	3	0.021	0.249
S1A_547958750	1A	547958750	G	175	0.621	A	107	0.379	3	0.021	0.249
S1A_548298782	1A	548298782	C	177	0.628	T	105	0.372	3	0.021	0.249
S1A_548300959	1A	548300959	T	175	0.621	C	107	0.379	3	0.021	0.249
S1A_548775451	1A	548775451	G	233	0.826	A	49	0.174	1	0.007	0.205
S1A_548956406	1A	548956406	G	228	0.809	A	54	0.191	2	0.014	0.214
S1A_549012098	1A	549012098	C	228	0.809	G	54	0.191	2	0.014	0.214
S1A_549213783	1A	549213783	A	223	0.791	G	59	0.209	1	0.007	0.221
S1A_549295002	1A	549295002	C	222	0.787	A	60	0.213	2	0.014	0.223
S1A_549298905	1A	549298905	T	222	0.787	C	60	0.213	2	0.014	0.223
S1A_549314919	1A	549314919	C	223	0.791	G	59	0.209	1	0.007	0.221
S1A_549420673	1A	549420673	T	160	0.567	C	122	0.433	4	0.028	0.25
S1A_549489299	1A	549489299	A	226	0.801	G	56	0.199	4	0.028	0.217
S1A_549511417	1A	549511417	C	208	0.738	G	74	0.262	4	0.028	0.237
S1A_549707035	1A	549707035	C	158	0.56	G	124	0.44	6	0.043	0.25
S1A_549851181	1A	549851181	A	159	0.564	C	123	0.436	5	0.035	0.25
S1A_550742533	1A	550742533	G	174	0.617	A	108	0.383	4	0.028	0.249
S1A_550790885	1A	550790885	C	174	0.617	G	108	0.383	4	0.028	0.249
S1A_551131565	1A	551131565	G	174	0.617	T	108	0.383	4	0.028	0.249
S1A_551170221	1A	551170221	T	157	0.557	G	125	0.443	5	0.035	0.25
S1A_551543858	1A	551543858	C	160	0.567	A	122	0.433	4	0.028	0.25
S1A_551790671	1A	551790671	C	247	0.876	T	35	0.124	1	0.007	0.17
S1A_551910214	1A	551910214	C	159	0.564	G	123	0.436	5	0.035	0.25
S1A_552188637	1A	552188637	A	174	0.617	G	108	0.383	6	0.043	0.249
S1A_552280058	1A	552280058	A	201	0.713	G	81	0.287	3	0.021	0.242
S1A_552281805	1A	552281805	A	201	0.713	G	81	0.287	3	0.021	0.242
S1A_552333339	1A	552333339	A	201	0.713	G	81	0.287	3	0.021	0.242
S1A_552974418	1A	552974418	T	199	0.706	C	83	0.294	3	0.021	0.243
S1A_554211827	1A	554211827	A	211	0.748	G	71	0.252	3	0.021	0.235
S1A_554243634	1A	554243634	A	211	0.748	C	71	0.252	3	0.021	0.235
S1A_554681868	1A	554681868	C	211	0.748	T	71	0.252	3	0.021	0.235
S1A_554941432	1A	554941432	G	211	0.748	A	71	0.252	3	0.021	0.235
S1A_554952104	1A	554952104	C	211	0.748	A	71	0.252	3	0.021	0.235
S1A_555072396	1A	555072396	G	211	0.748	A	71	0.252	3	0.021	0.235
S1A_555072424	1A	555072424	A	211	0.748	G	71	0.252	3	0.021	0.235
S1A_555820426	1A	555820426	A	195	0.691	C	87	0.309	3	0.021	0.245
S1A_555948141	1A	555948141	G	173	0.613	A	109	0.387	9	0.064	0.249
S1A_556109917	1A	556109917	A	253	0.897	G	29	0.103	1	0.007	0.15
S1A_557295620	1A	557295620	T	158	0.56	C	124	0.44	4	0.028	0.25
S1A_557295935	1A	557295935	C	159	0.564	T	123	0.436	3	0.021	0.25
S1A_557314695	1A	557314695	A	159	0.564	G	123	0.436	3	0.021	0.25
S1A_557466000	1A	557466000	G	159	0.564	A	123	0.436	3	0.021	0.25
S1A_557977404	1A	557977404	G	158	0.56	A	124	0.44	4	0.028	0.25
S1A_558253708	1A	558253708	A	159	0.564	G	123	0.436	3	0.021	0.25
S1A_558307360	1A	558307360	G	160	0.567	A	122	0.433	2	0.014	0.25
S1A_558316677	1A	558316677	C	152	0.539	G	130	0.461	2	0.014	0.25
S1A_558464613	1A	558464613	C	159	0.564	T	123	0.436	1	0.007	0.25
S1A_558541135	1A	558541135	G	159	0.564	A	123	0.436	1	0.007	0.25
S1A_558591438	1A	558591438	C	159	0.564	T	123	0.436	1	0.007	0.25
S1A_559114283	1A	559114283	T	158	0.56	C	124	0.44	2	0.014	0.25
S1A_559504207	1A	559504207	G	158	0.56	A	124	0.44	2	0.014	0.25
S1A_559613286	1A	559613286	G	158	0.56	A	124	0.44	2	0.014	0.25
S1A_559780257	1A	559780257	C	158	0.56	T	124	0.44	2	0.014	0.25
S1A_559780854	1A	559780854	G	158	0.56	A	124	0.44	2	0.014	0.25
S1A_559976386	1A	559976386	G	158	0.56	T	124	0.44	2	0.014	0.25
S1A_560369127	1A	560369127	G	218	0.773	A	64	0.227	4	0.028	0.228
S1A_560437999	1A	560437999	A	158	0.56	G	124	0.44	2	0.014	0.25
S1A_560829371	1A	560829371	G	231	0.819	T	51	0.181	5	0.035	0.209
S1A_561171206	1A	561171206	C	158	0.56	G	124	0.44	2	0.014	0.25
S1A_561372892	1A	561372892	C	230	0.816	T	52	0.184	4	0.028	0.21
S1A_564125293	1A	564125293	C	144	0.511	T	138	0.489	2	0.014	0.25
S1A_564314347	1A	564314347	G	185	0.656	T	97	0.344	3	0.021	0.248
S1A_564570772	1A	564570772	G	166	0.589	A	116	0.411	4	0.028	0.25
S1A_564585359	1A	564585359	G	241	0.855	T	41	0.145	3	0.021	0.187
S1A_565049896	1A	565049896	C	241	0.855	T	41	0.145	3	0.021	0.187
S1A_565121462	1A	565121462	G	156	0.553	A	126	0.447	4	0.028	0.25
S1A_565187582	1A	565187582	G	156	0.553	T	126	0.447	4	0.028	0.25
S1A_565198894	1A	565198894	T	169	0.599	G	113	0.401	5	0.035	0.25
S1A_565294670	1A	565294670	A	236	0.837	C	46	0.163	6	0.043	0.198
S1A_565389355	1A	565389355	T	156	0.553	A	126	0.447	4	0.028	0.25
S1A_565395781	1A	565395781	G	147	0.521	A	135	0.479	5	0.035	0.25
S1A_565519207	1A	565519207	A	189	0.67	C	93	0.33	5	0.035	0.247
S1A_566008502	1A	566008502	C	229	0.812	T	53	0.188	7	0.05	0.212
S1A_566064814	1A	566064814	G	173	0.613	A	109	0.387	7	0.05	0.249
S1A_566160916	1A	566160916	C	166	0.589	T	116	0.411	6	0.043	0.25
S1A_566195267	1A	566195267	G	157	0.557	T	125	0.443	5	0.035	0.25
S1A_566224664	1A	566224664	G	157	0.557	A	125	0.443	5	0.035	0.25
S1A_566300736	1A	566300736	G	242	0.858	A	40	0.142	2	0.014	0.184
S1A_566319240	1A	566319240	C	157	0.557	T	125	0.443	5	0.035	0.25
S1A_566369466	1A	566369466	T	267	0.947	C	15	0.053	1	0.007	0.091
S1A_566378186	1A	566378186	G	242	0.858	A	40	0.142	2	0.014	0.184
S1A_566565240	1A	566565240	C	230	0.816	T	52	0.184	2	0.014	0.21
S1A_566590619	1A	566590619	G	192	0.681	T	90	0.319	4	0.028	0.246
S1A_566599268	1A	566599268	T	242	0.858	C	40	0.142	2	0.014	0.184
S1A_566634180	1A	566634180	G	232	0.823	C	50	0.177	2	0.014	0.207
S1A_566634210	1A	566634210	C	241	0.855	T	41	0.145	1	0.007	0.187
S1A_567477989	1A	567477989	G	247	0.876	T	35	0.124	1	0.007	0.17
S1A_567478043	1A	567478043	C	253	0.897	T	29	0.103	1	0.007	0.15
S1A_567630576	1A	567630576	G	204	0.723	A	78	0.277	4	0.028	0.24
S1A_567633152	1A	567633152	C	239	0.848	A	43	0.152	1	0.007	0.192
S1A_567966808	1A	567966808	T	202	0.716	C	80	0.284	4	0.028	0.241
S1A_567987959	1A	567987959	A	161	0.571	G	121	0.429	3	0.021	0.25
S1A_568003154	1A	568003154	C	156	0.553	T	126	0.447	4	0.028	0.25
S1A_568013220	1A	568013220	T	155	0.55	C	127	0.45	3	0.021	0.25
S1A_568032856	1A	568032856	G	157	0.557	C	125	0.443	3	0.021	0.25
S1A_568112294	1A	568112294	C	197	0.699	T	85	0.301	3	0.021	0.244
S1A_568381115	1A	568381115	G	262	0.929	C	20	0.071	0	0	0.114
S1A_568459119	1A	568459119	C	210	0.745	G	72	0.255	2	0.014	0.236
S1A_568496490	1A	568496490	G	268	0.95	A	14	0.05	0	0	0.085
S1A_568496498	1A	568496498	T	210	0.745	C	72	0.255	2	0.014	0.236
S1A_568547327	1A	568547327	G	243	0.862	T	39	0.138	1	0.007	0.182
S1A_568650731	1A	568650731	G	243	0.862	A	39	0.138	1	0.007	0.182
S1A_568650751	1A	568650751	G	268	0.95	A	14	0.05	0	0	0.085
S1A_568721487	1A	568721487	C	268	0.95	T	14	0.05	0	0	0.085
S1A_568938225	1A	568938225	C	268	0.95	T	14	0.05	0	0	0.085
S1A_569246480	1A	569246480	G	213	0.755	A	69	0.245	3	0.021	0.233
S1A_569306173	1A	569306173	G	254	0.901	A	28	0.099	6	0.043	0.147
S1A_570226695	1A	570226695	T	268	0.95	G	14	0.05	0	0	0.085
S1A_570227644	1A	570227644	G	268	0.95	T	14	0.05	0	0	0.085
S1A_570256054	1A	570256054	A	241	0.855	G	41	0.145	1	0.007	0.187
S1A_570392715	1A	570392715	G	190	0.674	A	92	0.326	8	0.057	0.246
S1A_570423549	1A	570423549	G	144	0.511	C	138	0.489	4	0.028	0.25
S1A_570615890	1A	570615890	C	144	0.511	T	138	0.489	4	0.028	0.25
S1A_570620150	1A	570620150	C	144	0.511	G	138	0.489	4	0.028	0.25
S1A_570880964	1A	570880964	A	260	0.922	G	22	0.078	2	0.014	0.123
S1A_571348798	1A	571348798	C	227	0.805	T	55	0.195	3	0.021	0.215
S1A_571740835	1A	571740835	C	260	0.922	T	22	0.078	2	0.014	0.123
S1A_571784890	1A	571784890	C	260	0.922	G	22	0.078	2	0.014	0.123
S1A_571903597	1A	571903597	A	153	0.543	T	129	0.457	5	0.035	0.25
S1A_571933685	1A	571933685	C	146	0.518	G	136	0.482	2	0.014	0.25
S1A_571959822	1A	571959822	T	260	0.922	C	22	0.078	2	0.014	0.123
S1A_571959844	1A	571959844	G	260	0.922	T	22	0.078	2	0.014	0.123
S1A_571991217	1A	571991217	T	260	0.922	C	22	0.078	2	0.014	0.123
S1A_572022462	1A	572022462	G	146	0.518	A	136	0.482	2	0.014	0.25
S1A_572022482	1A	572022482	A	158	0.56	C	124	0.44	4	0.028	0.25
S1A_572072836	1A	572072836	G	146	0.518	A	136	0.482	2	0.014	0.25
S1A_572156296	1A	572156296	C	146	0.518	T	136	0.482	2	0.014	0.25
S1A_572156362	1A	572156362	C	260	0.922	T	22	0.078	2	0.014	0.123
S1A_572679727	1A	572679727	T	199	0.706	C	83	0.294	3	0.021	0.243
S1A_572680899	1A	572680899	C	260	0.922	T	22	0.078	4	0.028	0.123
S1A_572747081	1A	572747081	A	223	0.791	T	59	0.209	3	0.021	0.221
S1A_573064405	1A	573064405	C	199	0.706	G	83	0.294	3	0.021	0.243
S1A_573064575	1A	573064575	C	199	0.706	G	83	0.294	3	0.021	0.243
S1A_573393024	1A	573393024	G	226	0.801	A	56	0.199	4	0.028	0.217
S1A_573393087	1A	573393087	T	143	0.507	C	139	0.493	5	0.035	0.25
S1A_573883388	1A	573883388	T	220	0.78	C	62	0.22	4	0.028	0.225
S1A_573921801	1A	573921801	G	226	0.801	A	56	0.199	4	0.028	0.217
S1A_574233703	1A	574233703	A	226	0.801	G	56	0.199	4	0.028	0.217
S1A_574479469	1A	574479469	G	265	0.94	C	17	0.06	1	0.007	0.1
S1A_574569851	1A	574569851	G	259	0.918	A	23	0.082	1	0.007	0.127
S1A_574845603	1A	574845603	C	263	0.933	G	19	0.067	3	0.021	0.11
S1A_575160002	1A	575160002	A	164	0.582	G	118	0.418	14	0.099	0.25
S1A_575223412	1A	575223412	A	208	0.738	C	74	0.262	6	0.043	0.237
S1A_576568556	1A	576568556	C	169	0.599	T	113	0.401	7	0.05	0.25
S1A_576698011	1A	576698011	A	209	0.741	G	73	0.259	3	0.021	0.236
S1A_577373186	1A	577373186	T	191	0.677	C	91	0.323	3	0.021	0.246
S1A_577377232	1A	577377232	C	194	0.688	T	88	0.312	4	0.028	0.245
S1A_577394706	1A	577394706	C	266	0.943	T	16	0.057	2	0.014	0.096
S1A_577480402	1A	577480402	G	263	0.933	C	19	0.067	3	0.021	0.11
S1A_577508665	1A	577508665	A	263	0.933	G	19	0.067	3	0.021	0.11
S1A_577636386	1A	577636386	T	190	0.674	A	92	0.326	6	0.043	0.246
S1A_577805429	1A	577805429	G	198	0.702	C	84	0.298	4	0.028	0.243
S1A_578015317	1A	578015317	C	198	0.702	G	84	0.298	4	0.028	0.243
S1A_578250654	1A	578250654	T	201	0.713	G	81	0.287	3	0.021	0.242
S1A_578299695	1A	578299695	A	201	0.713	C	81	0.287	3	0.021	0.242
S1A_578324269	1A	578324269	C	214	0.759	G	68	0.241	2	0.014	0.232
S1A_578329017	1A	578329017	G	214	0.759	A	68	0.241	2	0.014	0.232
S1A_578347725	1A	578347725	T	201	0.713	C	81	0.287	3	0.021	0.242
S1A_578357031	1A	578357031	A	201	0.713	G	81	0.287	3	0.021	0.242
S1A_578785369	1A	578785369	T	216	0.766	C	66	0.234	2	0.014	0.23
S1A_578790056	1A	578790056	A	216	0.766	T	66	0.234	2	0.014	0.23
S1A_578827793	1A	578827793	G	228	0.809	A	54	0.191	2	0.014	0.214
S1A_578933504	1A	578933504	A	217	0.769	G	65	0.231	1	0.007	0.229
S1A_579008152	1A	579008152	C	230	0.816	A	52	0.184	0	0	0.21
S1A_579157342	1A	579157342	C	197	0.699	T	85	0.301	1	0.007	0.244
S1A_579218100	1A	579218100	G	266	0.943	T	16	0.057	0	0	0.096
S1A_579225352	1A	579225352	C	267	0.947	T	15	0.053	1	0.007	0.091
S1A_579302715	1A	579302715	G	230	0.816	C	52	0.184	0	0	0.21
S1A_579403901	1A	579403901	T	230	0.816	G	52	0.184	0	0	0.21
S1A_579407706	1A	579407706	G	268	0.95	A	14	0.05	0	0	0.085
S1A_579623552	1A	579623552	G	230	0.816	A	52	0.184	0	0	0.21
S1A_579785955	1A	579785955	A	230	0.816	G	52	0.184	0	0	0.21
S1A_580021371	1A	580021371	G	185	0.656	T	97	0.344	3	0.021	0.248
S1A_580021442	1A	580021442	G	151	0.535	T	131	0.465	3	0.021	0.25
S1A_580084237	1A	580084237	A	151	0.535	G	131	0.465	3	0.021	0.25
S1A_580421624	1A	580421624	G	224	0.794	A	58	0.206	2	0.014	0.22
S1A_580437431	1A	580437431	C	240	0.851	T	42	0.149	2	0.014	0.189
S1A_580452798	1A	580452798	G	204	0.723	C	78	0.277	2	0.014	0.24
S1A_580453168	1A	580453168	G	248	0.879	A	34	0.121	0	0	0.167
S1A_580958028	1A	580958028	G	206	0.73	A	76	0.27	2	0.014	0.239
S1A_580961728	1A	580961728	C	240	0.851	T	42	0.149	2	0.014	0.189
S1A_581263216	1A	581263216	C	248	0.879	T	34	0.121	0	0	0.167
S1A_581306715	1A	581306715	C	248	0.879	G	34	0.121	0	0	0.167
S1A_581306774	1A	581306774	C	248	0.879	T	34	0.121	0	0	0.167
S1A_581386154	1A	581386154	T	248	0.879	G	34	0.121	0	0	0.167
S1A_581463498	1A	581463498	T	206	0.73	G	76	0.27	2	0.014	0.239
S1A_581472188	1A	581472188	C	240	0.851	A	42	0.149	2	0.014	0.189
S1A_581606898	1A	581606898	A	204	0.723	G	78	0.277	2	0.014	0.24
S1A_582276079	1A	582276079	T	240	0.851	C	42	0.149	2	0.014	0.189
S1A_582567767	1A	582567767	G	238	0.844	A	44	0.156	2	0.014	0.194
S1A_582654763	1A	582654763	G	249	0.883	A	33	0.117	1	0.007	0.164
S1A_582763967	1A	582763967	T	249	0.883	C	33	0.117	1	0.007	0.164
S1A_583167758	1A	583167758	G	250	0.887	A	32	0.113	2	0.014	0.161
S1A_583171719	1A	583171719	T	180	0.638	C	102	0.362	4	0.028	0.249
S1A_583171751	1A	583171751	G	249	0.883	A	33	0.117	1	0.007	0.164
S1A_583287245	1A	583287245	G	249	0.883	A	33	0.117	1	0.007	0.164
S1A_583289269	1A	583289269	T	180	0.638	C	102	0.362	4	0.028	0.249
S1A_583451496	1A	583451496	G	185	0.656	C	97	0.344	3	0.021	0.248
S1A_583452904	1A	583452904	A	183	0.649	G	99	0.351	3	0.021	0.248
S1A_583529709	1A	583529709	T	250	0.887	C	32	0.113	0	0	0.161
S1A_583715267	1A	583715267	C	250	0.887	G	32	0.113	0	0	0.161
S1A_583819106	1A	583819106	G	214	0.759	C	68	0.241	6	0.043	0.232
S1A_583868666	1A	583868666	A	216	0.766	G	66	0.234	4	0.028	0.23
S1A_583895754	1A	583895754	A	250	0.887	G	32	0.113	0	0	0.161
S1A_584000254	1A	584000254	A	215	0.762	G	67	0.238	5	0.035	0.231
S1A_584083646	1A	584083646	T	252	0.894	C	30	0.106	0	0	0.154
S1A_584084194	1A	584084194	G	251	0.89	C	31	0.11	1	0.007	0.157
S1A_584436785	1A	584436785	T	213	0.755	C	69	0.245	5	0.035	0.233
S1A_585246844	1A	585246844	T	217	0.769	G	65	0.231	3	0.021	0.229
S1A_585453558	1A	585453558	C	258	0.915	T	24	0.085	4	0.028	0.131
S1A_585624643	1A	585624643	A	208	0.738	G	74	0.262	2	0.014	0.237
S1A_585624687	1A	585624687	G	208	0.738	A	74	0.262	2	0.014	0.237
S1A_585645864	1A	585645864	A	218	0.773	G	64	0.227	2	0.014	0.228
S1A_585645875	1A	585645875	A	208	0.738	G	74	0.262	2	0.014	0.237
S1A_585652280	1A	585652280	C	208	0.738	T	74	0.262	2	0.014	0.237
S1A_585656529	1A	585656529	A	144	0.511	G	138	0.489	2	0.014	0.25
S1A_585656558	1A	585656558	C	208	0.738	G	74	0.262	2	0.014	0.237
S1A_586597796	1A	586597796	G	154	0.546	A	128	0.454	2	0.014	0.25
S1A_586603730	1A	586603730	A	154	0.546	G	128	0.454	2	0.014	0.25
S1A_586706397	1A	586706397	T	154	0.546	G	128	0.454	2	0.014	0.25
S1A_587670058	1A	587670058	G	228	0.809	A	54	0.191	2	0.014	0.214
S1A_587860891	1A	587860891	T	218	0.773	C	64	0.227	2	0.014	0.228
S1A_587863933	1A	587863933	T	163	0.578	C	119	0.422	3	0.021	0.25
S1A_588018477	1A	588018477	G	218	0.773	A	64	0.227	2	0.014	0.228
S1A_588098228	1A	588098228	A	218	0.773	G	64	0.227	2	0.014	0.228
S1A_588382900	1A	588382900	C	218	0.773	T	64	0.227	0	0	0.228
S1A_588683254	1A	588683254	G	218	0.773	A	64	0.227	0	0	0.228
S1A_589510618	1A	589510618	T	244	0.865	C	38	0.135	0	0	0.179
S1A_589607016	1A	589607016	G	210	0.745	A	72	0.255	2	0.014	0.236
S1A_589607060	1A	589607060	C	244	0.865	G	38	0.135	0	0	0.179
S1A_589629327	1A	589629327	G	210	0.745	A	72	0.255	2	0.014	0.236
S1A_589652056	1A	589652056	G	248	0.879	C	34	0.121	2	0.014	0.167
S1A_589689972	1A	589689972	C	248	0.879	G	34	0.121	2	0.014	0.167
S1A_589864899	1A	589864899	A	263	0.933	G	19	0.067	1	0.007	0.11
S1A_589896412	1A	589896412	A	267	0.947	C	15	0.053	1	0.007	0.091
S1A_589929722	1A	589929722	T	265	0.94	G	17	0.06	1	0.007	0.1
S1A_589962090	1A	589962090	C	246	0.872	A	36	0.128	0	0	0.173
S1A_589962101	1A	589962101	C	265	0.94	T	17	0.06	1	0.007	0.1
S1A_589991363	1A	589991363	A	186	0.66	G	96	0.34	4	0.028	0.247
S1A_589995287	1A	589995287	T	187	0.663	A	95	0.337	5	0.035	0.247
S1A_590005256	1A	590005256	G	170	0.603	A	112	0.397	6	0.043	0.25
S1A_590389811	1A	590389811	G	176	0.624	A	106	0.376	6	0.043	0.249
S1A_590554922	1A	590554922	C	212	0.752	A	70	0.248	2	0.014	0.234
S1A_592092919	1A	592092919	G	266	0.943	A	16	0.057	0	0	0.096
S1A_592103249	1A	592103249	G	177	0.628	A	105	0.372	1	0.007	0.249
S1A_592103332	1A	592103332	A	179	0.635	C	103	0.365	1	0.007	0.249
S1A_592212226	1A	592212226	G	266	0.943	T	16	0.057	0	0	0.096
S1A_592325581	1A	592325581	C	195	0.691	A	87	0.309	1	0.007	0.245
S1A_592356399	1A	592356399	A	197	0.699	T	85	0.301	1	0.007	0.244
S1A_592356403	1A	592356403	G	266	0.943	C	16	0.057	0	0	0.096
S1A_592424026	1A	592424026	G	180	0.638	A	102	0.362	2	0.014	0.249
S1A_592444982	1A	592444982	T	180	0.638	C	102	0.362	2	0.014	0.249
S1A_592499407	1A	592499407	G	266	0.943	A	16	0.057	0	0	0.096
S1A_592504054	1A	592504054	T	266	0.943	A	16	0.057	0	0	0.096
S1A_592756622	1A	592756622	G	265	0.94	A	17	0.06	1	0.007	0.1
S1A_592811719	1A	592811719	G	204	0.723	A	78	0.277	2	0.014	0.24
S1A_592811776	1A	592811776	C	266	0.943	T	16	0.057	0	0	0.096
S1A_593074361	1A	593074361	A	266	0.943	C	16	0.057	0	0	0.096
S1A_593501590	1A	593501590	G	265	0.94	A	17	0.06	1	0.007	0.1
S1A_593501613	1A	593501613	C	261	0.926	T	21	0.074	1	0.007	0.119
S1A_593501692	1A	593501692	G	266	0.943	A	16	0.057	0	0	0.096
S1A_593790090	1A	593790090	A	244	0.865	G	38	0.135	0	0	0.179
S1B_1299185	1B	1299185	T	156	0.553	C	126	0.447	10	0.071	0.25
S1B_1430915	1B	1430915	C	165	0.585	T	117	0.415	7	0.05	0.25
S1B_1434060	1B	1434060	T	165	0.585	G	117	0.415	7	0.05	0.25
S1B_1490348	1B	1490348	T	165	0.585	G	117	0.415	7	0.05	0.25
S1B_3214103	1B	3214103	C	263	0.933	T	19	0.067	1	0.007	0.11
S1B_3569598	1B	3569598	C	261	0.926	A	21	0.074	1	0.007	0.119
S1B_3572482	1B	3572482	G	261	0.926	A	21	0.074	1	0.007	0.119
S1B_3927890	1B	3927890	C	261	0.926	T	21	0.074	1	0.007	0.119
S1B_4335636	1B	4335636	A	261	0.926	G	21	0.074	1	0.007	0.119
S1B_5001706	1B	5001706	G	262	0.929	A	20	0.071	0	0	0.114
S1B_5935209	1B	5935209	A	260	0.922	C	22	0.078	2	0.014	0.123
S1B_5985920	1B	5985920	A	260	0.922	G	22	0.078	0	0	0.123
S1B_5990447	1B	5990447	C	260	0.922	G	22	0.078	0	0	0.123
S1B_6072596	1B	6072596	G	264	0.936	C	18	0.064	2	0.014	0.105
S1B_6138947	1B	6138947	A	262	0.929	G	20	0.071	0	0	0.114
S1B_6474600	1B	6474600	T	255	0.904	C	27	0.096	1	0.007	0.143
S1B_6481944	1B	6481944	A	266	0.943	G	16	0.057	0	0	0.096
S1B_6793664	1B	6793664	A	264	0.936	G	18	0.064	0	0	0.105
S1B_6823670	1B	6823670	T	256	0.908	C	26	0.092	0	0	0.139
S1B_6825322	1B	6825322	T	265	0.94	C	17	0.06	1	0.007	0.1
S1B_7165707	1B	7165707	A	264	0.936	G	18	0.064	0	0	0.105
S1B_7232629	1B	7232629	C	264	0.936	T	18	0.064	0	0	0.105
S1B_7254974	1B	7254974	G	255	0.904	T	27	0.096	1	0.007	0.143
S1B_7990331	1B	7990331	G	262	0.929	A	20	0.071	0	0	0.114
S1B_8152167	1B	8152167	T	264	0.936	C	18	0.064	0	0	0.105
S1B_8181483	1B	8181483	T	264	0.936	C	18	0.064	0	0	0.105
S1B_8181707	1B	8181707	A	264	0.936	C	18	0.064	0	0	0.105
S1B_8566239	1B	8566239	C	198	0.702	T	84	0.298	4	0.028	0.243
S1B_8569709	1B	8569709	G	198	0.702	A	84	0.298	4	0.028	0.243
S1B_9114780	1B	9114780	G	268	0.95	A	14	0.05	0	0	0.085
S1B_9584328	1B	9584328	T	198	0.702	C	84	0.298	4	0.028	0.243
S1B_9592721	1B	9592721	T	199	0.706	C	83	0.294	3	0.021	0.243
S1B_9644920	1B	9644920	C	197	0.699	A	85	0.301	3	0.021	0.244
S1B_9691095	1B	9691095	C	201	0.713	T	81	0.287	3	0.021	0.242
S1B_9711621	1B	9711621	A	196	0.695	G	86	0.305	4	0.028	0.244
S1B_9922008	1B	9922008	A	198	0.702	G	84	0.298	4	0.028	0.243
S1B_9946250	1B	9946250	T	199	0.706	C	83	0.294	3	0.021	0.243
S1B_9947361	1B	9947361	G	199	0.706	T	83	0.294	3	0.021	0.243
S1B_9989246	1B	9989246	C	199	0.706	T	83	0.294	3	0.021	0.243
S1B_10052746	1B	10052746	G	185	0.656	A	97	0.344	3	0.021	0.248
S1B_10060298	1B	10060298	C	186	0.66	A	96	0.34	2	0.014	0.247
S1B_10086248	1B	10086248	C	186	0.66	T	96	0.34	2	0.014	0.247
S1B_11693504	1B	11693504	G	177	0.628	T	105	0.372	3	0.021	0.249
S1B_12332320	1B	12332320	C	186	0.66	T	96	0.34	4	0.028	0.247
S1B_12374440	1B	12374440	G	202	0.716	A	80	0.284	4	0.028	0.241
S1B_12605330	1B	12605330	C	202	0.716	T	80	0.284	4	0.028	0.241
S1B_12918137	1B	12918137	T	183	0.649	C	99	0.351	3	0.021	0.248
S1B_13242570	1B	13242570	C	184	0.652	G	98	0.348	4	0.028	0.248
S1B_13893596	1B	13893596	C	184	0.652	T	98	0.348	4	0.028	0.248
S1B_14168748	1B	14168748	A	175	0.621	G	107	0.379	5	0.035	0.249
S1B_15155265	1B	15155265	A	251	0.89	G	31	0.11	1	0.007	0.157
S1B_15155278	1B	15155278	C	251	0.89	T	31	0.11	1	0.007	0.157
S1B_15393034	1B	15393034	C	260	0.922	G	22	0.078	4	0.028	0.123
S1B_15658769	1B	15658769	C	265	0.94	G	17	0.06	1	0.007	0.1
S1B_16166884	1B	16166884	T	173	0.613	C	109	0.387	3	0.021	0.249
S1B_16217064	1B	16217064	C	181	0.642	T	101	0.358	3	0.021	0.248
S1B_16427768	1B	16427768	G	169	0.599	A	113	0.401	3	0.021	0.25
S1B_16593961	1B	16593961	C	262	0.929	A	20	0.071	2	0.014	0.114
S1B_16666587	1B	16666587	T	187	0.663	C	95	0.337	1	0.007	0.247
S1B_17576729	1B	17576729	T	202	0.716	C	80	0.284	10	0.071	0.241
S1B_17816558	1B	17816558	C	182	0.645	T	100	0.355	2	0.014	0.248
S1B_18357127	1B	18357127	C	206	0.73	T	76	0.27	8	0.057	0.239
S1B_18569448	1B	18569448	G	181	0.642	A	101	0.358	1	0.007	0.248
S1B_18570787	1B	18570787	G	213	0.755	A	69	0.245	1	0.007	0.233
S1B_19203954	1B	19203954	A	216	0.766	G	66	0.234	0	0	0.23
S1B_19773113	1B	19773113	A	218	0.773	G	64	0.227	0	0	0.228
S1B_19773134	1B	19773134	T	191	0.677	C	91	0.323	1	0.007	0.246
S1B_20047970	1B	20047970	T	168	0.596	C	114	0.404	0	0	0.25
S1B_20269363	1B	20269363	A	180	0.638	G	102	0.362	0	0	0.249
S1B_20287464	1B	20287464	C	181	0.642	A	101	0.358	1	0.007	0.248
S1B_20742649	1B	20742649	T	164	0.582	G	118	0.418	0	0	0.25
S1B_20753261	1B	20753261	C	165	0.585	T	117	0.415	1	0.007	0.25
S1B_20831330	1B	20831330	G	164	0.582	A	118	0.418	0	0	0.25
S1B_21341567	1B	21341567	G	160	0.567	C	122	0.433	0	0	0.25
S1B_22649201	1B	22649201	T	268	0.95	C	14	0.05	0	0	0.085
S1B_22699784	1B	22699784	T	268	0.95	C	14	0.05	0	0	0.085
S1B_22954582	1B	22954582	G	268	0.95	A	14	0.05	0	0	0.085
S1B_23203720	1B	23203720	G	268	0.95	A	14	0.05	0	0	0.085
S1B_23978410	1B	23978410	C	264	0.936	T	18	0.064	2	0.014	0.105
S1B_24158106	1B	24158106	G	264	0.936	C	18	0.064	2	0.014	0.105
S1B_24223851	1B	24223851	G	264	0.936	A	18	0.064	2	0.014	0.105
S1B_24291647	1B	24291647	T	260	0.922	A	22	0.078	2	0.014	0.123
S1B_24568937	1B	24568937	A	178	0.631	G	104	0.369	4	0.028	0.249
S1B_24591834	1B	24591834	C	178	0.631	T	104	0.369	4	0.028	0.249
S1B_24736751	1B	24736751	G	179	0.635	T	103	0.365	3	0.021	0.249
S1B_24755951	1B	24755951	A	202	0.716	C	80	0.284	6	0.043	0.241
S1B_24932478	1B	24932478	C	267	0.947	G	15	0.053	1	0.007	0.091
S1B_25031477	1B	25031477	T	267	0.947	A	15	0.053	1	0.007	0.091
S1B_25750447	1B	25750447	A	168	0.596	G	114	0.404	4	0.028	0.25
S1B_25821788	1B	25821788	C	171	0.606	T	111	0.394	5	0.035	0.249
S1B_26333630	1B	26333630	G	204	0.723	A	78	0.277	4	0.028	0.24
S1B_26337811	1B	26337811	G	204	0.723	A	78	0.277	4	0.028	0.24
S1B_26444709	1B	26444709	C	205	0.727	T	77	0.273	3	0.021	0.239
S1B_30394654	1B	30394654	A	178	0.631	G	104	0.369	4	0.028	0.249
S1B_45304270	1B	45304270	T	265	0.94	G	17	0.06	3	0.021	0.1
S1B_46257098	1B	46257098	T	262	0.929	C	20	0.071	2	0.014	0.114
S1B_47503074	1B	47503074	A	263	0.933	C	19	0.067	1	0.007	0.11
S1B_48279869	1B	48279869	G	263	0.933	A	19	0.067	1	0.007	0.11
S1B_49927220	1B	49927220	C	263	0.933	T	19	0.067	1	0.007	0.11
S1B_50314915	1B	50314915	T	263	0.933	C	19	0.067	1	0.007	0.11
S1B_50635759	1B	50635759	A	261	0.926	G	21	0.074	1	0.007	0.119
S1B_52408393	1B	52408393	A	263	0.933	G	19	0.067	1	0.007	0.11
S1B_52639971	1B	52639971	C	265	0.94	G	17	0.06	1	0.007	0.1
S1B_52904820	1B	52904820	A	261	0.926	G	21	0.074	1	0.007	0.119
S1B_53936854	1B	53936854	T	263	0.933	C	19	0.067	1	0.007	0.11
S1B_54094731	1B	54094731	T	263	0.933	C	19	0.067	1	0.007	0.11
S1B_56313265	1B	56313265	A	263	0.933	C	19	0.067	1	0.007	0.11
S1B_58263754	1B	58263754	A	264	0.936	G	18	0.064	0	0	0.105
S1B_59044586	1B	59044586	A	263	0.933	G	19	0.067	1	0.007	0.11
S1B_59193648	1B	59193648	A	263	0.933	C	19	0.067	1	0.007	0.11
S1B_59231953	1B	59231953	G	263	0.933	C	19	0.067	1	0.007	0.11
S1B_59835481	1B	59835481	T	263	0.933	C	19	0.067	1	0.007	0.11
S1B_60256434	1B	60256434	G	263	0.933	A	19	0.067	1	0.007	0.11
S1B_60270868	1B	60270868	C	263	0.933	T	19	0.067	1	0.007	0.11
S1B_60457611	1B	60457611	C	263	0.933	T	19	0.067	1	0.007	0.11
S1B_60513581	1B	60513581	C	263	0.933	T	19	0.067	1	0.007	0.11
S1B_71297383	1B	71297383	C	266	0.943	T	16	0.057	0	0	0.096
S1B_85287658	1B	85287658	A	268	0.95	T	14	0.05	0	0	0.085
S1B_85769487	1B	85769487	G	268	0.95	C	14	0.05	0	0	0.085
S1B_86808627	1B	86808627	T	268	0.95	C	14	0.05	0	0	0.085
S1B_86948165	1B	86948165	C	268	0.95	A	14	0.05	0	0	0.085
S1B_88305536	1B	88305536	C	268	0.95	T	14	0.05	0	0	0.085
S1B_88926577	1B	88926577	C	268	0.95	T	14	0.05	0	0	0.085
S1B_88982105	1B	88982105	G	268	0.95	C	14	0.05	0	0	0.085
S1B_89404867	1B	89404867	A	268	0.95	T	14	0.05	0	0	0.085
S1B_89450786	1B	89450786	A	268	0.95	T	14	0.05	0	0	0.085
S1B_89531979	1B	89531979	A	268	0.95	G	14	0.05	0	0	0.085
S1B_89915639	1B	89915639	A	268	0.95	G	14	0.05	0	0	0.085
S1B_90226378	1B	90226378	A	268	0.95	G	14	0.05	0	0	0.085
S1B_90226495	1B	90226495	C	268	0.95	G	14	0.05	0	0	0.085
S1B_93094641	1B	93094641	G	242	0.858	A	40	0.142	2	0.014	0.184
S1B_95289824	1B	95289824	G	230	0.816	A	52	0.184	2	0.014	0.21
S1B_121281093	1B	121281093	A	207	0.734	G	75	0.266	1	0.007	0.238
S1B_121290405	1B	121290405	C	207	0.734	T	75	0.266	1	0.007	0.238
S1B_121462924	1B	121462924	G	211	0.748	A	71	0.252	1	0.007	0.235
S1B_122306916	1B	122306916	T	211	0.748	C	71	0.252	1	0.007	0.235
S1B_122907994	1B	122907994	T	211	0.748	C	71	0.252	1	0.007	0.235
S1B_123693298	1B	123693298	C	211	0.748	T	71	0.252	1	0.007	0.235
S1B_131243532	1B	131243532	A	220	0.78	G	62	0.22	2	0.014	0.225
S1B_131354872	1B	131354872	C	221	0.784	A	61	0.216	1	0.007	0.224
S1B_133456029	1B	133456029	A	210	0.745	C	72	0.255	2	0.014	0.236
S1B_142510842	1B	142510842	A	215	0.762	C	67	0.238	3	0.021	0.231
S1B_145251632	1B	145251632	T	214	0.759	C	68	0.241	2	0.014	0.232
S1B_155570004	1B	155570004	A	242	0.858	G	40	0.142	4	0.028	0.184
S1B_169864931	1B	169864931	C	240	0.851	T	42	0.149	0	0	0.189
S1B_170387061	1B	170387061	G	240	0.851	C	42	0.149	0	0	0.189
S1B_174644071	1B	174644071	T	240	0.851	C	42	0.149	0	0	0.189
S1B_175900834	1B	175900834	T	236	0.837	C	46	0.163	0	0	0.198
S1B_176291120	1B	176291120	C	240	0.851	T	42	0.149	0	0	0.189
S1B_181218252	1B	181218252	A	240	0.851	G	42	0.149	0	0	0.189
S1B_189450091	1B	189450091	G	240	0.851	A	42	0.149	0	0	0.189
S1B_197527565	1B	197527565	C	240	0.851	T	42	0.149	0	0	0.189
S1B_197786473	1B	197786473	A	236	0.837	G	46	0.163	0	0	0.198
S1B_198391779	1B	198391779	C	242	0.858	T	40	0.142	0	0	0.184
S1B_203836109	1B	203836109	C	240	0.851	T	42	0.149	0	0	0.189
S1B_209996834	1B	209996834	A	238	0.844	G	44	0.156	2	0.014	0.194
S1B_215291511	1B	215291511	G	261	0.926	A	21	0.074	1	0.007	0.119
S1B_241418554	1B	241418554	G	267	0.947	A	15	0.053	1	0.007	0.091
S1B_252130718	1B	252130718	G	254	0.901	A	28	0.099	0	0	0.147
S1B_264762000	1B	264762000	C	242	0.858	G	40	0.142	0	0	0.184
S1B_267817968	1B	267817968	C	242	0.858	T	40	0.142	0	0	0.184
S1B_270105085	1B	270105085	C	241	0.855	T	41	0.145	1	0.007	0.187
S1B_271239205	1B	271239205	C	241	0.855	T	41	0.145	1	0.007	0.187
S1B_271330780	1B	271330780	A	237	0.84	G	45	0.16	1	0.007	0.196
S1B_272070198	1B	272070198	C	241	0.855	G	41	0.145	1	0.007	0.187
S1B_285079888	1B	285079888	G	239	0.848	A	43	0.152	1	0.007	0.192
S1B_288164642	1B	288164642	A	235	0.833	G	47	0.167	1	0.007	0.201
S1B_289085903	1B	289085903	G	260	0.922	A	22	0.078	0	0	0.123
S1B_290423403	1B	290423403	G	260	0.922	A	22	0.078	0	0	0.123
S1B_291897879	1B	291897879	T	256	0.908	C	26	0.092	0	0	0.139
S1B_292130635	1B	292130635	G	256	0.908	C	26	0.092	0	0	0.139
S1B_293005642	1B	293005642	A	256	0.908	G	26	0.092	0	0	0.139
S1B_293340276	1B	293340276	G	256	0.908	A	26	0.092	0	0	0.139
S1B_294354253	1B	294354253	T	256	0.908	C	26	0.092	0	0	0.139
S1B_294354332	1B	294354332	T	256	0.908	C	26	0.092	0	0	0.139
S1B_295939444	1B	295939444	C	258	0.915	T	24	0.085	0	0	0.131
S1B_299942219	1B	299942219	C	264	0.936	G	18	0.064	0	0	0.105
S1B_302036963	1B	302036963	C	264	0.936	T	18	0.064	0	0	0.105
S1B_302037041	1B	302037041	T	264	0.936	C	18	0.064	0	0	0.105
S1B_302981781	1B	302981781	T	264	0.936	C	18	0.064	0	0	0.105
S1B_302981813	1B	302981813	C	264	0.936	T	18	0.064	0	0	0.105
S1B_307428944	1B	307428944	G	264	0.936	T	18	0.064	0	0	0.105
S1B_307481070	1B	307481070	G	264	0.936	A	18	0.064	0	0	0.105
S1B_310691421	1B	310691421	C	266	0.943	T	16	0.057	0	0	0.096
S1B_312919008	1B	312919008	T	264	0.936	G	18	0.064	0	0	0.105
S1B_314328647	1B	314328647	A	264	0.936	G	18	0.064	0	0	0.105
S1B_315386682	1B	315386682	G	264	0.936	A	18	0.064	0	0	0.105
S1B_324781701	1B	324781701	C	257	0.911	T	25	0.089	1	0.007	0.135
S1B_324787861	1B	324787861	C	259	0.918	T	23	0.082	1	0.007	0.127
S1B_325978397	1B	325978397	T	257	0.911	A	25	0.089	1	0.007	0.135
S1B_325985493	1B	325985493	G	257	0.911	A	25	0.089	1	0.007	0.135
S1B_327027632	1B	327027632	T	259	0.918	C	23	0.082	1	0.007	0.127
S1B_327347297	1B	327347297	C	257	0.911	T	25	0.089	1	0.007	0.135
S1B_327567658	1B	327567658	C	257	0.911	T	25	0.089	1	0.007	0.135
S1B_327840276	1B	327840276	C	257	0.911	T	25	0.089	1	0.007	0.135
S1B_328403340	1B	328403340	T	257	0.911	C	25	0.089	1	0.007	0.135
S1B_328813768	1B	328813768	G	256	0.908	A	26	0.092	0	0	0.139
S1B_328818709	1B	328818709	G	264	0.936	A	18	0.064	0	0	0.105
S1B_328983650	1B	328983650	C	264	0.936	G	18	0.064	0	0	0.105
S1B_328992891	1B	328992891	G	234	0.83	C	48	0.17	0	0	0.203
S1B_329376610	1B	329376610	C	243	0.862	T	39	0.138	1	0.007	0.182
S1B_333781271	1B	333781271	T	262	0.929	C	20	0.071	0	0	0.114
S1B_333897129	1B	333897129	G	262	0.929	A	20	0.071	0	0	0.114
S1B_333897803	1B	333897803	T	262	0.929	C	20	0.071	0	0	0.114
S1B_334104014	1B	334104014	T	268	0.95	C	14	0.05	0	0	0.085
S1B_336650712	1B	336650712	T	262	0.929	G	20	0.071	0	0	0.114
S1B_336787649	1B	336787649	G	262	0.929	A	20	0.071	0	0	0.114
S1B_338016386	1B	338016386	T	264	0.936	G	18	0.064	0	0	0.105
S1B_338843944	1B	338843944	G	264	0.936	C	18	0.064	0	0	0.105
S1B_340427571	1B	340427571	T	256	0.908	C	26	0.092	0	0	0.139
S1B_340462171	1B	340462171	A	234	0.83	G	48	0.17	0	0	0.203
S1B_340462230	1B	340462230	C	254	0.901	T	28	0.099	0	0	0.147
S1B_340540911	1B	340540911	A	254	0.901	G	28	0.099	0	0	0.147
S1B_340585785	1B	340585785	C	262	0.929	T	20	0.071	0	0	0.114
S1B_343113152	1B	343113152	T	256	0.908	C	26	0.092	0	0	0.139
S1B_347032327	1B	347032327	T	263	0.933	G	19	0.067	5	0.035	0.11
S1B_364419036	1B	364419036	T	268	0.95	C	14	0.05	0	0	0.085
S1B_364575231	1B	364575231	A	262	0.929	G	20	0.071	0	0	0.114
S1B_365493860	1B	365493860	C	254	0.901	T	28	0.099	0	0	0.147
S1B_365648612	1B	365648612	G	254	0.901	A	28	0.099	0	0	0.147
S1B_365857734	1B	365857734	C	254	0.901	G	28	0.099	0	0	0.147
S1B_366431940	1B	366431940	G	254	0.901	A	28	0.099	0	0	0.147
S1B_366535711	1B	366535711	C	254	0.901	G	28	0.099	0	0	0.147
S1B_366535813	1B	366535813	T	254	0.901	C	28	0.099	0	0	0.147
S1B_366877779	1B	366877779	G	245	0.869	C	37	0.131	1	0.007	0.176
S1B_367425871	1B	367425871	A	254	0.901	G	28	0.099	0	0	0.147
S1B_367840503	1B	367840503	C	254	0.901	T	28	0.099	0	0	0.147
S1B_369378931	1B	369378931	C	264	0.936	T	18	0.064	0	0	0.105
S1B_370034331	1B	370034331	G	264	0.936	A	18	0.064	0	0	0.105
S1B_370726429	1B	370726429	G	254	0.901	A	28	0.099	0	0	0.147
S1B_371139155	1B	371139155	C	264	0.936	T	18	0.064	0	0	0.105
S1B_371450432	1B	371450432	A	254	0.901	G	28	0.099	0	0	0.147
S1B_372679251	1B	372679251	A	262	0.929	G	20	0.071	0	0	0.114
S1B_372717361	1B	372717361	G	264	0.936	A	18	0.064	0	0	0.105
S1B_373282548	1B	373282548	A	254	0.901	G	28	0.099	0	0	0.147
S1B_373495843	1B	373495843	C	268	0.95	T	14	0.05	0	0	0.085
S1B_376550760	1B	376550760	T	264	0.936	C	18	0.064	0	0	0.105
S1B_377285658	1B	377285658	T	264	0.936	C	18	0.064	0	0	0.105
S1B_377911155	1B	377911155	A	264	0.936	G	18	0.064	0	0	0.105
S1B_377911433	1B	377911433	C	264	0.936	A	18	0.064	0	0	0.105
S1B_378010698	1B	378010698	G	262	0.929	C	20	0.071	0	0	0.114
S1B_378044906	1B	378044906	A	264	0.936	T	18	0.064	0	0	0.105
S1B_378828655	1B	378828655	T	264	0.936	C	18	0.064	0	0	0.105
S1B_380472549	1B	380472549	A	264	0.936	G	18	0.064	0	0	0.105
S1B_380644010	1B	380644010	T	258	0.915	G	24	0.085	0	0	0.131
S1B_381650384	1B	381650384	A	262	0.929	G	20	0.071	0	0	0.114
S1B_381672146	1B	381672146	G	254	0.901	T	28	0.099	0	0	0.147
S1B_382015908	1B	382015908	C	260	0.922	A	22	0.078	0	0	0.123
S1B_383202169	1B	383202169	G	264	0.936	T	18	0.064	0	0	0.105
S1B_384300578	1B	384300578	C	263	0.933	G	19	0.067	1	0.007	0.11
S1B_385216750	1B	385216750	G	263	0.933	C	19	0.067	1	0.007	0.11
S1B_386268026	1B	386268026	T	263	0.933	G	19	0.067	1	0.007	0.11
S1B_386793712	1B	386793712	A	263	0.933	G	19	0.067	1	0.007	0.11
S1B_388146390	1B	388146390	A	263	0.933	G	19	0.067	1	0.007	0.11
S1B_389580109	1B	389580109	T	263	0.933	C	19	0.067	1	0.007	0.11
S1B_389598496	1B	389598496	G	263	0.933	C	19	0.067	1	0.007	0.11
S1B_389877892	1B	389877892	T	263	0.933	C	19	0.067	1	0.007	0.11
S1B_390046413	1B	390046413	T	263	0.933	G	19	0.067	1	0.007	0.11
S1B_390397700	1B	390397700	T	263	0.933	C	19	0.067	1	0.007	0.11
S1B_390614204	1B	390614204	C	263	0.933	T	19	0.067	1	0.007	0.11
S1B_390968546	1B	390968546	T	266	0.943	C	16	0.057	2	0.014	0.096
S1B_391422107	1B	391422107	G	263	0.933	A	19	0.067	1	0.007	0.11
S1B_392145700	1B	392145700	A	263	0.933	C	19	0.067	1	0.007	0.11
S1B_392496520	1B	392496520	A	263	0.933	G	19	0.067	1	0.007	0.11
S1B_392532095	1B	392532095	C	263	0.933	A	19	0.067	1	0.007	0.11
S1B_393269427	1B	393269427	C	264	0.936	T	18	0.064	0	0	0.105
S1B_394041503	1B	394041503	G	264	0.936	A	18	0.064	0	0	0.105
S1B_394715062	1B	394715062	A	254	0.901	G	28	0.099	0	0	0.147
S1B_394858664	1B	394858664	G	254	0.901	A	28	0.099	0	0	0.147
S1B_394892785	1B	394892785	T	254	0.901	C	28	0.099	0	0	0.147
S1B_395228351	1B	395228351	G	254	0.901	A	28	0.099	0	0	0.147
S1B_397878207	1B	397878207	G	248	0.879	A	34	0.121	2	0.014	0.167
S1B_399401941	1B	399401941	G	262	0.929	A	20	0.071	0	0	0.114
S1B_399402034	1B	399402034	A	254	0.901	G	28	0.099	0	0	0.147
S1B_399534262	1B	399534262	C	264	0.936	T	18	0.064	0	0	0.105
S1B_400306725	1B	400306725	C	264	0.936	T	18	0.064	0	0	0.105
S1B_400959034	1B	400959034	G	260	0.922	A	22	0.078	0	0	0.123
S1B_401758216	1B	401758216	G	264	0.936	C	18	0.064	0	0	0.105
S1B_402043386	1B	402043386	C	253	0.897	T	29	0.103	1	0.007	0.15
S1B_402113039	1B	402113039	G	253	0.897	T	29	0.103	1	0.007	0.15
S1B_403186556	1B	403186556	C	253	0.897	T	29	0.103	1	0.007	0.15
S1B_403188489	1B	403188489	T	253	0.897	C	29	0.103	1	0.007	0.15
S1B_403979139	1B	403979139	C	263	0.933	T	19	0.067	1	0.007	0.11
S1B_404964511	1B	404964511	T	261	0.926	A	21	0.074	1	0.007	0.119
S1B_405710802	1B	405710802	G	253	0.897	T	29	0.103	1	0.007	0.15
S1B_406039568	1B	406039568	A	263	0.933	G	19	0.067	1	0.007	0.11
S1B_406048312	1B	406048312	C	263	0.933	T	19	0.067	1	0.007	0.11
S1B_406048336	1B	406048336	G	253	0.897	C	29	0.103	1	0.007	0.15
S1B_408458677	1B	408458677	T	255	0.904	C	27	0.096	1	0.007	0.143
S1B_409300792	1B	409300792	C	263	0.933	G	19	0.067	1	0.007	0.11
S1B_409331011	1B	409331011	A	253	0.897	G	29	0.103	1	0.007	0.15
S1B_409419622	1B	409419622	C	261	0.926	T	21	0.074	1	0.007	0.119
S1B_409680515	1B	409680515	A	263	0.933	C	19	0.067	1	0.007	0.11
S1B_410321701	1B	410321701	G	253	0.897	A	29	0.103	1	0.007	0.15
S1B_410331321	1B	410331321	G	253	0.897	A	29	0.103	1	0.007	0.15
S1B_411180155	1B	411180155	T	253	0.897	C	29	0.103	1	0.007	0.15
S1B_411990571	1B	411990571	G	254	0.901	C	28	0.099	2	0.014	0.147
S1B_415037097	1B	415037097	A	254	0.901	G	28	0.099	2	0.014	0.147
S1B_416777058	1B	416777058	T	254	0.901	G	28	0.099	2	0.014	0.147
S1B_418587137	1B	418587137	G	254	0.901	A	28	0.099	2	0.014	0.147
S1B_419261630	1B	419261630	G	254	0.901	A	28	0.099	2	0.014	0.147
S1B_419779416	1B	419779416	A	258	0.915	G	24	0.085	2	0.014	0.131
S1B_420362120	1B	420362120	C	258	0.915	T	24	0.085	2	0.014	0.131
S1B_420418680	1B	420418680	C	266	0.943	A	16	0.057	2	0.014	0.096
S1B_420864237	1B	420864237	C	260	0.922	T	22	0.078	2	0.014	0.123
S1B_421000914	1B	421000914	G	256	0.908	C	26	0.092	2	0.014	0.139
S1B_421000927	1B	421000927	A	266	0.943	T	16	0.057	2	0.014	0.096
S1B_421003299	1B	421003299	C	266	0.943	T	16	0.057	2	0.014	0.096
S1B_421097124	1B	421097124	G	265	0.94	A	17	0.06	1	0.007	0.1
S1B_421576839	1B	421576839	T	265	0.94	C	17	0.06	1	0.007	0.1
S1B_422112711	1B	422112711	T	265	0.94	C	17	0.06	1	0.007	0.1
S1B_423142733	1B	423142733	C	265	0.94	T	17	0.06	1	0.007	0.1
S1B_423288054	1B	423288054	T	259	0.918	G	23	0.082	1	0.007	0.127
S1B_424538267	1B	424538267	A	257	0.911	G	25	0.089	1	0.007	0.135
S1B_426443901	1B	426443901	A	265	0.94	G	17	0.06	1	0.007	0.1
S1B_426478154	1B	426478154	A	265	0.94	G	17	0.06	1	0.007	0.1
S1B_426686668	1B	426686668	C	265	0.94	T	17	0.06	1	0.007	0.1
S1B_427467299	1B	427467299	T	266	0.943	A	16	0.057	2	0.014	0.096
S1B_427530884	1B	427530884	A	253	0.897	G	29	0.103	1	0.007	0.15
S1B_427543374	1B	427543374	G	265	0.94	A	17	0.06	1	0.007	0.1
S1B_427628121	1B	427628121	G	265	0.94	A	17	0.06	1	0.007	0.1
S1B_428605173	1B	428605173	T	257	0.911	G	25	0.089	1	0.007	0.135
S1B_429981280	1B	429981280	A	251	0.89	G	31	0.11	1	0.007	0.157
S1B_431859097	1B	431859097	G	261	0.926	A	21	0.074	1	0.007	0.119
S1B_431859122	1B	431859122	G	258	0.915	T	24	0.085	2	0.014	0.131
S1B_432803491	1B	432803491	C	263	0.933	T	19	0.067	1	0.007	0.11
S1B_433020278	1B	433020278	C	265	0.94	G	17	0.06	3	0.021	0.1
S1B_434084213	1B	434084213	G	262	0.929	A	20	0.071	0	0	0.114
S1B_442888330	1B	442888330	C	253	0.897	T	29	0.103	1	0.007	0.15
S1B_442968510	1B	442968510	T	253	0.897	C	29	0.103	1	0.007	0.15
S1B_447174329	1B	447174329	C	202	0.716	A	80	0.284	2	0.014	0.241
S1B_448498111	1B	448498111	C	202	0.716	T	80	0.284	2	0.014	0.241
S1B_448740348	1B	448740348	C	259	0.918	T	23	0.082	3	0.021	0.127
S1B_450756393	1B	450756393	G	161	0.571	T	121	0.429	3	0.021	0.25
S1B_451069953	1B	451069953	G	160	0.567	T	122	0.433	4	0.028	0.25
S1B_451069955	1B	451069955	C	241	0.855	T	41	0.145	3	0.021	0.187
S1B_452765224	1B	452765224	A	241	0.855	G	41	0.145	1	0.007	0.187
S1B_452770221	1B	452770221	A	241	0.855	C	41	0.145	1	0.007	0.187
S1B_453188672	1B	453188672	T	241	0.855	C	41	0.145	1	0.007	0.187
S1B_453278609	1B	453278609	T	241	0.855	C	41	0.145	1	0.007	0.187
S1B_453479939	1B	453479939	C	241	0.855	T	41	0.145	1	0.007	0.187
S1B_453815164	1B	453815164	A	241	0.855	G	41	0.145	1	0.007	0.187
S1B_454887980	1B	454887980	T	241	0.855	A	41	0.145	1	0.007	0.187
S1B_455584751	1B	455584751	A	241	0.855	G	41	0.145	1	0.007	0.187
S1B_455764288	1B	455764288	C	241	0.855	A	41	0.145	1	0.007	0.187
S1B_455903012	1B	455903012	T	241	0.855	C	41	0.145	1	0.007	0.187
S1B_456602570	1B	456602570	G	239	0.848	A	43	0.152	3	0.021	0.192
S1B_456744771	1B	456744771	A	251	0.89	G	31	0.11	1	0.007	0.157
S1B_457378212	1B	457378212	A	251	0.89	G	31	0.11	1	0.007	0.157
S1B_457535596	1B	457535596	T	251	0.89	C	31	0.11	1	0.007	0.157
S1B_457537760	1B	457537760	C	198	0.702	T	84	0.298	4	0.028	0.243
S1B_457754822	1B	457754822	T	167	0.592	C	115	0.408	5	0.035	0.25
S1B_457757435	1B	457757435	G	262	0.929	A	20	0.071	0	0	0.114
S1B_457866340	1B	457866340	C	262	0.929	T	20	0.071	0	0	0.114
S1B_457876708	1B	457876708	T	188	0.667	A	94	0.333	4	0.028	0.247
S1B_458203382	1B	458203382	C	262	0.929	T	20	0.071	0	0	0.114
S1B_458325630	1B	458325630	G	262	0.929	T	20	0.071	0	0	0.114
S1B_458326203	1B	458326203	G	262	0.929	A	20	0.071	0	0	0.114
S1B_458328035	1B	458328035	C	167	0.592	A	115	0.408	3	0.021	0.25
S1B_458328073	1B	458328073	A	262	0.929	G	20	0.071	0	0	0.114
S1B_458728562	1B	458728562	G	262	0.929	A	20	0.071	0	0	0.114
S1B_461236200	1B	461236200	C	255	0.904	T	27	0.096	1	0.007	0.143
S1B_461300897	1B	461300897	C	167	0.592	T	115	0.408	3	0.021	0.25
S1B_461300962	1B	461300962	T	167	0.592	C	115	0.408	3	0.021	0.25
S1B_461804602	1B	461804602	A	260	0.922	G	22	0.078	2	0.014	0.123
S1B_463346168	1B	463346168	C	262	0.929	T	20	0.071	0	0	0.114
S1B_463530278	1B	463530278	T	167	0.592	C	115	0.408	3	0.021	0.25
S1B_464129196	1B	464129196	T	260	0.922	G	22	0.078	0	0	0.123
S1B_464197927	1B	464197927	A	167	0.592	G	115	0.408	3	0.021	0.25
S1B_464553690	1B	464553690	G	167	0.592	A	115	0.408	3	0.021	0.25
S1B_465216218	1B	465216218	T	167	0.592	C	115	0.408	3	0.021	0.25
S1B_465461998	1B	465461998	A	167	0.592	G	115	0.408	3	0.021	0.25
S1B_473496554	1B	473496554	C	222	0.787	T	60	0.213	2	0.014	0.223
S1B_480841645	1B	480841645	T	232	0.823	C	50	0.177	2	0.014	0.207
S1B_487021712	1B	487021712	G	240	0.851	A	42	0.149	2	0.014	0.189
S1B_487657094	1B	487657094	C	225	0.798	T	57	0.202	3	0.021	0.219
S1B_488037989	1B	488037989	T	219	0.777	C	63	0.223	3	0.021	0.227
S1B_488038239	1B	488038239	G	235	0.833	A	47	0.167	3	0.021	0.201
S1B_488208391	1B	488208391	T	264	0.936	C	18	0.064	0	0	0.105
S1B_488297831	1B	488297831	T	234	0.83	C	48	0.17	2	0.014	0.203
S1B_488650178	1B	488650178	C	262	0.929	T	20	0.071	2	0.014	0.114
S1B_492833541	1B	492833541	A	242	0.858	G	40	0.142	0	0	0.184
S1B_497378981	1B	497378981	A	242	0.858	G	40	0.142	0	0	0.184
S1B_498063992	1B	498063992	T	242	0.858	C	40	0.142	0	0	0.184
S1B_499556038	1B	499556038	T	219	0.777	G	63	0.223	1	0.007	0.227
S1B_499899200	1B	499899200	G	246	0.872	C	36	0.128	0	0	0.173
S1B_502639517	1B	502639517	A	246	0.872	G	36	0.128	0	0	0.173
S1B_502935194	1B	502935194	C	246	0.872	G	36	0.128	0	0	0.173
S1B_502969816	1B	502969816	C	252	0.894	T	30	0.106	0	0	0.154
S1B_502970339	1B	502970339	T	252	0.894	C	30	0.106	0	0	0.154
S1B_503344807	1B	503344807	T	252	0.894	C	30	0.106	0	0	0.154
S1B_504506778	1B	504506778	A	246	0.872	C	36	0.128	0	0	0.173
S1B_506715118	1B	506715118	A	222	0.787	T	60	0.213	0	0	0.223
S1B_507224878	1B	507224878	C	268	0.95	T	14	0.05	0	0	0.085
S1B_508149654	1B	508149654	T	245	0.869	C	37	0.131	1	0.007	0.176
S1B_511451310	1B	511451310	A	251	0.89	G	31	0.11	1	0.007	0.157
S1B_512768473	1B	512768473	C	247	0.876	T	35	0.124	1	0.007	0.17
S1B_512768522	1B	512768522	G	247	0.876	A	35	0.124	1	0.007	0.17
S1B_518877213	1B	518877213	G	238	0.844	C	44	0.156	2	0.014	0.194
S1B_519984299	1B	519984299	A	266	0.943	G	16	0.057	2	0.014	0.096
S1B_520394919	1B	520394919	T	231	0.819	C	51	0.181	1	0.007	0.209
S1B_520525807	1B	520525807	C	241	0.855	T	41	0.145	1	0.007	0.187
S1B_521004908	1B	521004908	C	250	0.887	T	32	0.113	0	0	0.161
S1B_521521374	1B	521521374	A	241	0.855	G	41	0.145	1	0.007	0.187
S1B_523776528	1B	523776528	G	260	0.922	A	22	0.078	0	0	0.123
S1B_524066092	1B	524066092	C	260	0.922	T	22	0.078	0	0	0.123
S1B_524095925	1B	524095925	G	264	0.936	A	18	0.064	0	0	0.105
S1B_524356090	1B	524356090	T	152	0.539	C	130	0.461	4	0.028	0.25
S1B_524539764	1B	524539764	G	266	0.943	T	16	0.057	0	0	0.096
S1B_525655065	1B	525655065	G	260	0.922	A	22	0.078	0	0	0.123
S1B_526251320	1B	526251320	C	266	0.943	G	16	0.057	0	0	0.096
S1B_526271823	1B	526271823	A	266	0.943	G	16	0.057	0	0	0.096
S1B_526277059	1B	526277059	G	260	0.922	A	22	0.078	0	0	0.123
S1B_526570325	1B	526570325	G	260	0.922	T	22	0.078	0	0	0.123
S1B_526750541	1B	526750541	A	222	0.787	G	60	0.213	2	0.014	0.223
S1B_527375650	1B	527375650	G	244	0.865	A	38	0.135	2	0.014	0.179
S1B_529288354	1B	529288354	G	243	0.862	A	39	0.138	1	0.007	0.182
S1B_529627555	1B	529627555	T	239	0.848	C	43	0.152	1	0.007	0.192
S1B_529627861	1B	529627861	C	243	0.862	T	39	0.138	1	0.007	0.182
S1B_529996301	1B	529996301	G	243	0.862	C	39	0.138	1	0.007	0.182
S1B_530026481	1B	530026481	G	233	0.826	C	49	0.174	1	0.007	0.205
S1B_530480101	1B	530480101	T	244	0.865	C	38	0.135	2	0.014	0.179
S1B_531206150	1B	531206150	C	240	0.851	T	42	0.149	2	0.014	0.189
S1B_531726815	1B	531726815	T	238	0.844	C	44	0.156	2	0.014	0.194
S1B_531867384	1B	531867384	G	238	0.844	A	44	0.156	2	0.014	0.194
S1B_531877868	1B	531877868	T	263	0.933	G	19	0.067	1	0.007	0.11
S1B_532396302	1B	532396302	C	244	0.865	T	38	0.135	2	0.014	0.179
S1B_532400622	1B	532400622	G	244	0.865	A	38	0.135	2	0.014	0.179
S1B_532401662	1B	532401662	C	244	0.865	T	38	0.135	2	0.014	0.179
S1B_532541702	1B	532541702	G	236	0.837	A	46	0.163	2	0.014	0.198
S1B_532711549	1B	532711549	C	241	0.855	T	41	0.145	1	0.007	0.187
S1B_533109285	1B	533109285	A	234	0.83	G	48	0.17	2	0.014	0.203
S1B_533109302	1B	533109302	G	244	0.865	A	38	0.135	2	0.014	0.179
S1B_533193840	1B	533193840	G	244	0.865	A	38	0.135	2	0.014	0.179
S1B_533399880	1B	533399880	C	242	0.858	G	40	0.142	2	0.014	0.184
S1B_534667041	1B	534667041	C	238	0.844	T	44	0.156	2	0.014	0.194
S1B_535606360	1B	535606360	C	214	0.759	T	68	0.241	2	0.014	0.232
S1B_535801307	1B	535801307	C	258	0.915	T	24	0.085	0	0	0.131
S1B_536466077	1B	536466077	A	210	0.745	G	72	0.255	0	0	0.236
S1B_538054584	1B	538054584	A	236	0.837	C	46	0.163	0	0	0.198
S1B_538179198	1B	538179198	C	236	0.837	G	46	0.163	0	0	0.198
S1B_538721272	1B	538721272	A	244	0.865	G	38	0.135	0	0	0.179
S1B_540049992	1B	540049992	T	204	0.723	C	78	0.277	0	0	0.24
S1B_541878044	1B	541878044	G	202	0.716	A	80	0.284	0	0	0.241
S1B_543018672	1B	543018672	C	247	0.876	T	35	0.124	1	0.007	0.17
S1B_543486068	1B	543486068	G	253	0.897	A	29	0.103	1	0.007	0.15
S1B_543498025	1B	543498025	G	213	0.755	A	69	0.245	1	0.007	0.233
S1B_544133222	1B	544133222	A	253	0.897	G	29	0.103	1	0.007	0.15
S1B_545302517	1B	545302517	T	247	0.876	A	35	0.124	1	0.007	0.17
S1B_545318548	1B	545318548	T	205	0.727	C	77	0.273	1	0.007	0.239
S1B_545367821	1B	545367821	G	247	0.876	A	35	0.124	1	0.007	0.17
S1B_545426219	1B	545426219	A	240	0.851	G	42	0.149	0	0	0.189
S1B_545553544	1B	545553544	G	203	0.72	A	79	0.28	1	0.007	0.241
S1B_545644664	1B	545644664	A	240	0.851	G	42	0.149	0	0	0.189
S1B_546252472	1B	546252472	G	203	0.72	A	79	0.28	1	0.007	0.241
S1B_546701499	1B	546701499	G	209	0.741	C	73	0.259	3	0.021	0.236
S1B_546885475	1B	546885475	G	203	0.72	T	79	0.28	1	0.007	0.241
S1B_546895458	1B	546895458	T	223	0.791	C	59	0.209	1	0.007	0.221
S1B_546973924	1B	546973924	G	203	0.72	A	79	0.28	1	0.007	0.241
S1B_546974176	1B	546974176	A	203	0.72	G	79	0.28	1	0.007	0.241
S1B_547524267	1B	547524267	T	264	0.936	C	18	0.064	0	0	0.105
S1B_547973154	1B	547973154	T	221	0.784	C	61	0.216	1	0.007	0.224
S1B_548201079	1B	548201079	T	205	0.727	A	77	0.273	1	0.007	0.239
S1B_548534234	1B	548534234	C	264	0.936	T	18	0.064	0	0	0.105
S1B_548620015	1B	548620015	G	223	0.791	A	59	0.209	1	0.007	0.221
S1B_548628321	1B	548628321	T	223	0.791	C	59	0.209	1	0.007	0.221
S1B_548898672	1B	548898672	G	205	0.727	C	77	0.273	1	0.007	0.239
S1B_549454459	1B	549454459	C	246	0.872	T	36	0.128	0	0	0.173
S1B_549995418	1B	549995418	G	264	0.936	A	18	0.064	0	0	0.105
S1B_550022644	1B	550022644	T	264	0.936	C	18	0.064	0	0	0.105
S1B_550022688	1B	550022688	C	232	0.823	T	50	0.177	0	0	0.207
S1B_550288165	1B	550288165	G	264	0.936	A	18	0.064	0	0	0.105
S1B_550395885	1B	550395885	A	206	0.73	G	76	0.27	0	0	0.239
S1B_550479626	1B	550479626	T	222	0.787	A	60	0.213	0	0	0.223
S1B_550482454	1B	550482454	T	264	0.936	C	18	0.064	0	0	0.105
S1B_550639643	1B	550639643	T	264	0.936	A	18	0.064	0	0	0.105
S1B_550685008	1B	550685008	C	264	0.936	A	18	0.064	0	0	0.105
S1B_550685015	1B	550685015	C	234	0.83	T	48	0.17	0	0	0.203
S1B_550855514	1B	550855514	T	224	0.794	C	58	0.206	0	0	0.22
S1B_551391337	1B	551391337	C	214	0.759	G	68	0.241	2	0.014	0.232
S1B_551391351	1B	551391351	T	224	0.794	C	58	0.206	0	0	0.22
S1B_552274179	1B	552274179	G	266	0.943	C	16	0.057	0	0	0.096
S1B_553937375	1B	553937375	C	254	0.901	T	28	0.099	0	0	0.147
S1B_554232767	1B	554232767	T	250	0.887	G	32	0.113	0	0	0.161
S1B_554430787	1B	554430787	G	206	0.73	T	76	0.27	10	0.071	0.239
S1B_554522237	1B	554522237	C	262	0.929	T	20	0.071	0	0	0.114
S1B_555129133	1B	555129133	G	262	0.929	A	20	0.071	0	0	0.114
S1B_556105481	1B	556105481	T	238	0.844	C	44	0.156	0	0	0.194
S1B_558215458	1B	558215458	A	266	0.943	G	16	0.057	0	0	0.096
S1B_558561647	1B	558561647	T	262	0.929	C	20	0.071	0	0	0.114
S1B_558574004	1B	558574004	C	262	0.929	T	20	0.071	0	0	0.114
S1B_558911762	1B	558911762	G	258	0.915	A	24	0.085	0	0	0.131
S1B_558998139	1B	558998139	A	258	0.915	C	24	0.085	0	0	0.131
S1B_559317874	1B	559317874	C	162	0.574	T	120	0.426	6	0.043	0.25
S1B_560242537	1B	560242537	T	230	0.816	C	52	0.184	0	0	0.21
S1B_561269883	1B	561269883	G	228	0.809	C	54	0.191	0	0	0.214
S1B_561621883	1B	561621883	A	244	0.865	G	38	0.135	0	0	0.179
S1B_561695821	1B	561695821	C	242	0.858	T	40	0.142	0	0	0.184
S1B_561708663	1B	561708663	A	242	0.858	G	40	0.142	0	0	0.184
S1B_561759145	1B	561759145	G	240	0.851	A	42	0.149	0	0	0.189
S1B_562303298	1B	562303298	C	180	0.638	A	102	0.362	6	0.043	0.249
S1B_562563480	1B	562563480	C	256	0.908	A	26	0.092	0	0	0.139
S1B_563030530	1B	563030530	T	183	0.649	C	99	0.351	3	0.021	0.248
S1B_563067025	1B	563067025	T	142	0.504	C	140	0.496	4	0.028	0.25
S1B_563444512	1B	563444512	A	153	0.543	T	129	0.457	5	0.035	0.25
S1B_563682824	1B	563682824	C	256	0.908	G	26	0.092	0	0	0.139
S1B_563695061	1B	563695061	G	175	0.621	A	107	0.379	5	0.035	0.249
S1B_563695074	1B	563695074	C	256	0.908	T	26	0.092	0	0	0.139
S1B_563847737	1B	563847737	A	251	0.89	G	31	0.11	3	0.021	0.157
S1B_564299574	1B	564299574	A	142	0.504	G	140	0.496	4	0.028	0.25
S1B_564299598	1B	564299598	G	169	0.599	A	113	0.401	3	0.021	0.25
S1B_564574880	1B	564574880	T	261	0.926	C	21	0.074	1	0.007	0.119
S1B_564574971	1B	564574971	C	261	0.926	G	21	0.074	1	0.007	0.119
S1B_564635814	1B	564635814	A	203	0.72	G	79	0.28	7	0.05	0.241
S1B_564650597	1B	564650597	T	251	0.89	C	31	0.11	1	0.007	0.157
S1B_564653560	1B	564653560	C	182	0.645	G	100	0.355	4	0.028	0.248
S1B_564717970	1B	564717970	T	168	0.596	C	114	0.404	4	0.028	0.25
S1B_564863951	1B	564863951	G	168	0.596	A	114	0.404	4	0.028	0.25
S1B_564908743	1B	564908743	T	182	0.645	G	100	0.355	4	0.028	0.248
S1B_565566720	1B	565566720	G	146	0.518	A	136	0.482	6	0.043	0.25
S1B_565569126	1B	565569126	C	247	0.876	T	35	0.124	1	0.007	0.17
S1B_565680387	1B	565680387	T	181	0.642	C	101	0.358	5	0.035	0.248
S1B_565756525	1B	565756525	A	152	0.539	G	130	0.461	6	0.043	0.25
S1B_565898108	1B	565898108	G	179	0.635	A	103	0.365	5	0.035	0.249
S1B_565932237	1B	565932237	A	170	0.603	G	112	0.397	6	0.043	0.25
S1B_565940881	1B	565940881	T	162	0.574	C	120	0.426	6	0.043	0.25
S1B_566016812	1B	566016812	T	241	0.855	C	41	0.145	1	0.007	0.187
S1B_566149945	1B	566149945	A	175	0.621	G	107	0.379	5	0.035	0.249
S1B_566149954	1B	566149954	C	247	0.876	G	35	0.124	1	0.007	0.17
S1B_566171302	1B	566171302	G	176	0.624	A	106	0.376	4	0.028	0.249
S1B_566182990	1B	566182990	C	248	0.879	G	34	0.121	0	0	0.167
S1B_566183896	1B	566183896	G	210	0.745	A	72	0.255	4	0.028	0.236
S1B_567214090	1B	567214090	C	221	0.784	T	61	0.216	1	0.007	0.224
S1B_567986068	1B	567986068	G	221	0.784	A	61	0.216	1	0.007	0.224
S1B_567986251	1B	567986251	C	221	0.784	T	61	0.216	1	0.007	0.224
S1B_568747242	1B	568747242	G	245	0.869	C	37	0.131	1	0.007	0.176
S1B_568960977	1B	568960977	G	255	0.904	A	27	0.096	1	0.007	0.143
S1B_568961025	1B	568961025	C	245	0.869	G	37	0.131	1	0.007	0.176
S1B_569053693	1B	569053693	T	255	0.904	C	27	0.096	1	0.007	0.143
S1B_569507932	1B	569507932	C	255	0.904	T	27	0.096	1	0.007	0.143
S1B_569563714	1B	569563714	A	238	0.844	G	44	0.156	6	0.043	0.194
S1B_569642586	1B	569642586	C	244	0.865	T	38	0.135	0	0	0.179
S1B_569642606	1B	569642606	A	255	0.904	G	27	0.096	1	0.007	0.143
S1B_569882525	1B	569882525	A	255	0.904	G	27	0.096	1	0.007	0.143
S1B_569932716	1B	569932716	G	229	0.812	A	53	0.188	1	0.007	0.212
S1B_569973949	1B	569973949	G	255	0.904	T	27	0.096	1	0.007	0.143
S1B_569976012	1B	569976012	C	202	0.716	T	80	0.284	2	0.014	0.241
S1B_571193208	1B	571193208	A	235	0.833	G	47	0.167	1	0.007	0.201
S1B_571204220	1B	571204220	G	241	0.855	A	41	0.145	1	0.007	0.187
S1B_571445343	1B	571445343	G	205	0.727	C	77	0.273	1	0.007	0.239
S1B_571491423	1B	571491423	G	258	0.915	A	24	0.085	0	0	0.131
S1B_571631957	1B	571631957	G	205	0.727	A	77	0.273	1	0.007	0.239
S1B_571709651	1B	571709651	G	233	0.826	A	49	0.174	1	0.007	0.205
S1B_571757948	1B	571757948	C	229	0.812	A	53	0.188	1	0.007	0.212
S1B_571766256	1B	571766256	A	233	0.826	T	49	0.174	1	0.007	0.205
S1B_572013120	1B	572013120	G	258	0.915	A	24	0.085	0	0	0.131
S1B_572077526	1B	572077526	A	258	0.915	G	24	0.085	0	0	0.131
S1B_572077620	1B	572077620	T	237	0.84	C	45	0.16	1	0.007	0.196
S1B_572141412	1B	572141412	T	258	0.915	A	24	0.085	0	0	0.131
S1B_572148485	1B	572148485	C	258	0.915	G	24	0.085	0	0	0.131
S1B_572257667	1B	572257667	A	257	0.911	G	25	0.089	1	0.007	0.135
S1B_572257704	1B	572257704	C	255	0.904	A	27	0.096	1	0.007	0.143
S1B_573008237	1B	573008237	A	259	0.918	G	23	0.082	1	0.007	0.127
S1B_573040784	1B	573040784	G	259	0.918	A	23	0.082	1	0.007	0.127
S1B_573323546	1B	573323546	G	260	0.922	A	22	0.078	2	0.014	0.123
S1B_573323563	1B	573323563	G	167	0.592	T	115	0.408	5	0.035	0.25
S1B_573358427	1B	573358427	T	167	0.592	C	115	0.408	5	0.035	0.25
S1B_575129210	1B	575129210	C	190	0.674	A	92	0.326	4	0.028	0.246
S1B_575129239	1B	575129239	T	264	0.936	A	18	0.064	0	0	0.105
S1B_575441583	1B	575441583	C	190	0.674	T	92	0.326	4	0.028	0.246
S1B_575446013	1B	575446013	G	264	0.936	C	18	0.064	0	0	0.105
S1B_575712674	1B	575712674	C	190	0.674	T	92	0.326	4	0.028	0.246
S1B_576127886	1B	576127886	A	184	0.652	G	98	0.348	4	0.028	0.248
S1B_576223928	1B	576223928	C	184	0.652	A	98	0.348	6	0.043	0.248
S1B_577037097	1B	577037097	C	184	0.652	G	98	0.348	6	0.043	0.248
S1B_577038108	1B	577038108	G	184	0.652	C	98	0.348	6	0.043	0.248
S1B_577186731	1B	577186731	T	184	0.652	C	98	0.348	6	0.043	0.248
S1B_577207182	1B	577207182	A	175	0.621	G	107	0.379	5	0.035	0.249
S1B_577451579	1B	577451579	C	185	0.656	T	97	0.344	5	0.035	0.248
S1B_577611450	1B	577611450	G	185	0.656	T	97	0.344	5	0.035	0.248
S1B_577834832	1B	577834832	T	185	0.656	C	97	0.344	5	0.035	0.248
S1B_579785675	1B	579785675	C	267	0.947	T	15	0.053	1	0.007	0.091
S1B_581199980	1B	581199980	G	144	0.511	C	138	0.489	4	0.028	0.25
S1B_582866467	1B	582866467	A	154	0.546	G	128	0.454	4	0.028	0.25
S1B_582905056	1B	582905056	G	154	0.546	T	128	0.454	4	0.028	0.25
S1B_583209384	1B	583209384	T	173	0.613	G	109	0.387	5	0.035	0.249
S1B_583759748	1B	583759748	C	145	0.514	G	137	0.486	5	0.035	0.25
S1B_584320561	1B	584320561	G	267	0.947	A	15	0.053	1	0.007	0.091
S1B_585076045	1B	585076045	G	185	0.656	A	97	0.344	5	0.035	0.248
S1B_585322218	1B	585322218	T	164	0.582	C	118	0.418	4	0.028	0.25
S1B_585326031	1B	585326031	C	164	0.582	G	118	0.418	4	0.028	0.25
S1B_585326368	1B	585326368	G	164	0.582	A	118	0.418	4	0.028	0.25
S1B_585535569	1B	585535569	A	184	0.652	G	98	0.348	4	0.028	0.248
S1B_585548403	1B	585548403	A	167	0.592	G	115	0.408	5	0.035	0.25
S1B_585817377	1B	585817377	T	166	0.589	C	116	0.411	6	0.043	0.25
S1B_585888040	1B	585888040	G	258	0.915	A	24	0.085	2	0.014	0.131
S1B_587024581	1B	587024581	G	258	0.915	A	24	0.085	0	0	0.131
S1B_587138373	1B	587138373	T	154	0.546	C	128	0.454	8	0.057	0.25
S1B_587276316	1B	587276316	T	154	0.546	G	128	0.454	8	0.057	0.25
S1B_587501379	1B	587501379	G	258	0.915	A	24	0.085	0	0	0.131
S1B_587524762	1B	587524762	G	154	0.546	A	128	0.454	8	0.057	0.25
S1B_587977450	1B	587977450	G	154	0.546	A	128	0.454	8	0.057	0.25
S1B_588005015	1B	588005015	A	267	0.947	T	15	0.053	1	0.007	0.091
S1B_588149808	1B	588149808	T	154	0.546	C	128	0.454	8	0.057	0.25
S1B_588213931	1B	588213931	G	264	0.936	A	18	0.064	2	0.014	0.105
S1B_588225355	1B	588225355	G	184	0.652	A	98	0.348	6	0.043	0.248
S1B_588225411	1B	588225411	C	256	0.908	T	26	0.092	2	0.014	0.139
S1B_588432711	1B	588432711	A	205	0.727	G	77	0.273	5	0.035	0.239
S1B_588432712	1B	588432712	C	205	0.727	T	77	0.273	5	0.035	0.239
S1B_588479737	1B	588479737	T	223	0.791	G	59	0.209	5	0.035	0.221
S1B_588516027	1B	588516027	C	191	0.677	T	91	0.323	5	0.035	0.246
S1B_588518404	1B	588518404	T	226	0.801	C	56	0.199	4	0.028	0.217
S1B_589703769	1B	589703769	C	165	0.585	T	117	0.415	5	0.035	0.25
S1B_589703802	1B	589703802	A	151	0.535	C	131	0.465	3	0.021	0.25
S1B_589890315	1B	589890315	C	146	0.518	A	136	0.482	8	0.057	0.25
S1B_590504888	1B	590504888	C	176	0.624	T	106	0.376	6	0.043	0.249
S1B_590506540	1B	590506540	G	176	0.624	C	106	0.376	6	0.043	0.249
S1B_590940759	1B	590940759	A	195	0.691	C	87	0.309	5	0.035	0.245
S1B_591225142	1B	591225142	G	250	0.887	A	32	0.113	2	0.014	0.161
S1B_591225778	1B	591225778	C	252	0.894	T	30	0.106	4	0.028	0.154
S1B_591225805	1B	591225805	C	263	0.933	T	19	0.067	1	0.007	0.11
S1B_591364734	1B	591364734	G	163	0.578	A	119	0.422	5	0.035	0.25
S1B_591512790	1B	591512790	G	196	0.695	A	86	0.305	4	0.028	0.244
S1B_591512829	1B	591512829	C	196	0.695	G	86	0.305	4	0.028	0.244
S1B_592209740	1B	592209740	C	266	0.943	T	16	0.057	2	0.014	0.096
S1B_592547120	1B	592547120	C	194	0.688	G	88	0.312	2	0.014	0.245
S1B_592649084	1B	592649084	G	249	0.883	C	33	0.117	1	0.007	0.164
S1B_592980155	1B	592980155	G	154	0.546	A	128	0.454	6	0.043	0.25
S1B_592980158	1B	592980158	G	154	0.546	A	128	0.454	6	0.043	0.25
S1B_593050639	1B	593050639	T	238	0.844	G	44	0.156	0	0	0.194
S1B_593140412	1B	593140412	G	265	0.94	A	17	0.06	1	0.007	0.1
S1B_593150258	1B	593150258	G	265	0.94	A	17	0.06	1	0.007	0.1
S1B_593176863	1B	593176863	A	265	0.94	G	17	0.06	1	0.007	0.1
S1B_593176868	1B	593176868	C	169	0.599	T	113	0.401	3	0.021	0.25
S1B_593546529	1B	593546529	C	259	0.918	T	23	0.082	1	0.007	0.127
S1B_593566439	1B	593566439	G	175	0.621	A	107	0.379	3	0.021	0.249
S1B_593610656	1B	593610656	G	259	0.918	A	23	0.082	1	0.007	0.127
S1B_593722365	1B	593722365	T	265	0.94	G	17	0.06	1	0.007	0.1
S1B_593835399	1B	593835399	G	266	0.943	C	16	0.057	0	0	0.096
S1B_593910530	1B	593910530	G	266	0.943	T	16	0.057	0	0	0.096
S1B_593910579	1B	593910579	A	177	0.628	G	105	0.372	3	0.021	0.249
S1B_593916808	1B	593916808	T	160	0.567	C	122	0.433	4	0.028	0.25
S1B_593916951	1B	593916951	A	177	0.628	G	105	0.372	3	0.021	0.249
S1B_594063746	1B	594063746	T	154	0.546	C	128	0.454	4	0.028	0.25
S1B_594654831	1B	594654831	G	177	0.628	T	105	0.372	3	0.021	0.249
S1B_594766027	1B	594766027	A	259	0.918	G	23	0.082	1	0.007	0.127
S1B_594965501	1B	594965501	G	259	0.918	A	23	0.082	1	0.007	0.127
S1B_595161068	1B	595161068	T	255	0.904	C	27	0.096	3	0.021	0.143
S1B_595163852	1B	595163852	C	177	0.628	T	105	0.372	3	0.021	0.249
S1B_595177521	1B	595177521	C	177	0.628	G	105	0.372	3	0.021	0.249
S1B_595441585	1B	595441585	C	154	0.546	A	128	0.454	4	0.028	0.25
S1B_595471200	1B	595471200	T	154	0.546	C	128	0.454	4	0.028	0.25
S1B_595587395	1B	595587395	A	154	0.546	T	128	0.454	4	0.028	0.25
S1B_596895036	1B	596895036	G	179	0.635	A	103	0.365	3	0.021	0.249
S1B_601243657	1B	601243657	G	260	0.922	A	22	0.078	2	0.014	0.123
S1B_601252990	1B	601252990	G	141	0.5	T	141	0.5	3	0.021	0.25
S1B_601377919	1B	601377919	G	145	0.514	A	137	0.486	3	0.021	0.25
S1B_601382932	1B	601382932	A	141	0.5	G	141	0.5	3	0.021	0.25
S1B_601415609	1B	601415609	A	145	0.514	G	137	0.486	3	0.021	0.25
S1B_601429271	1B	601429271	G	145	0.514	A	137	0.486	3	0.021	0.25
S1B_602234432	1B	602234432	C	141	0.5	G	141	0.5	3	0.021	0.25
S1B_602282750	1B	602282750	C	141	0.5	T	141	0.5	3	0.021	0.25
S1B_603092459	1B	603092459	A	141	0.5	G	141	0.5	3	0.021	0.25
S1B_604626722	1B	604626722	C	144	0.511	T	138	0.489	4	0.028	0.25
S1B_606584561	1B	606584561	G	167	0.592	A	115	0.408	3	0.021	0.25
S1B_612905337	1B	612905337	C	160	0.567	A	122	0.433	4	0.028	0.25
S1B_613088031	1B	613088031	T	233	0.826	C	49	0.174	3	0.021	0.205
S1B_613419644	1B	613419644	T	143	0.507	G	139	0.493	3	0.021	0.25
S1B_613523333	1B	613523333	T	260	0.922	C	22	0.078	2	0.014	0.123
S1B_614500790	1B	614500790	G	155	0.55	C	127	0.45	3	0.021	0.25
S1B_615019960	1B	615019960	T	155	0.55	A	127	0.45	3	0.021	0.25
S1B_615209584	1B	615209584	C	179	0.635	T	103	0.365	1	0.007	0.249
S1B_615614213	1B	615614213	T	155	0.55	C	127	0.45	3	0.021	0.25
S1B_620015814	1B	620015814	C	176	0.624	A	106	0.376	2	0.014	0.249
S1B_620015835	1B	620015835	G	266	0.943	A	16	0.057	0	0	0.096
S1B_620787306	1B	620787306	C	176	0.624	A	106	0.376	2	0.014	0.249
S1B_622370017	1B	622370017	A	169	0.599	G	113	0.401	3	0.021	0.25
S1B_622709471	1B	622709471	C	225	0.798	T	57	0.202	1	0.007	0.219
S1B_624672576	1B	624672576	A	185	0.656	G	97	0.344	3	0.021	0.248
S1B_624703834	1B	624703834	G	266	0.943	C	16	0.057	0	0	0.096
S1B_624958863	1B	624958863	T	171	0.606	C	111	0.394	3	0.021	0.249
S1B_624993429	1B	624993429	C	171	0.606	A	111	0.394	3	0.021	0.249
S1B_625012379	1B	625012379	C	236	0.837	T	46	0.163	2	0.014	0.198
S1B_625036463	1B	625036463	A	178	0.631	G	104	0.369	4	0.028	0.249
S1B_625164723	1B	625164723	C	168	0.596	T	114	0.404	4	0.028	0.25
S1B_625232015	1B	625232015	G	264	0.936	A	18	0.064	0	0	0.105
S1B_625364248	1B	625364248	G	191	0.677	T	91	0.323	5	0.035	0.246
S1B_625466728	1B	625466728	T	185	0.656	C	97	0.344	3	0.021	0.248
S1B_625472128	1B	625472128	C	194	0.688	T	88	0.312	4	0.028	0.245
S1B_625721248	1B	625721248	G	170	0.603	A	112	0.397	4	0.028	0.25
S1B_625822329	1B	625822329	G	180	0.638	A	102	0.362	4	0.028	0.249
S1B_626029145	1B	626029145	G	266	0.943	A	16	0.057	2	0.014	0.096
S1B_626067898	1B	626067898	C	262	0.929	A	20	0.071	0	0	0.114
S1B_626069867	1B	626069867	T	264	0.936	C	18	0.064	0	0	0.105
S1B_626228962	1B	626228962	T	174	0.617	C	108	0.383	4	0.028	0.249
S1B_626398179	1B	626398179	A	174	0.617	G	108	0.383	4	0.028	0.249
S1B_627098767	1B	627098767	A	181	0.642	G	101	0.358	3	0.021	0.248
S1B_627920478	1B	627920478	T	181	0.642	C	101	0.358	3	0.021	0.248
S1B_628959672	1B	628959672	G	249	0.883	A	33	0.117	1	0.007	0.164
S1B_628983900	1B	628983900	A	249	0.883	T	33	0.117	1	0.007	0.164
S1B_628983908	1B	628983908	T	203	0.72	C	79	0.28	1	0.007	0.241
S1B_629063608	1B	629063608	T	204	0.723	C	78	0.277	2	0.014	0.24
S1B_629267056	1B	629267056	A	250	0.887	C	32	0.113	2	0.014	0.161
S1B_629304240	1B	629304240	A	249	0.883	G	33	0.117	1	0.007	0.164
S1B_629322659	1B	629322659	T	162	0.574	C	120	0.426	8	0.057	0.25
S1B_629470985	1B	629470985	A	249	0.883	G	33	0.117	1	0.007	0.164
S1B_629489631	1B	629489631	G	249	0.883	A	33	0.117	1	0.007	0.164
S1B_629602989	1B	629602989	A	149	0.528	G	133	0.472	13	0.092	0.25
S1B_629644189	1B	629644189	G	260	0.922	A	22	0.078	0	0	0.123
S1B_629664326	1B	629664326	G	260	0.922	A	22	0.078	0	0	0.123
S1B_629756071	1B	629756071	A	141	0.5	G	141	0.5	7	0.05	0.25
S1B_629810164	1B	629810164	C	267	0.947	A	15	0.053	1	0.007	0.091
S1B_629810199	1B	629810199	C	159	0.564	T	123	0.436	7	0.05	0.25
S1B_629811837	1B	629811837	G	267	0.947	A	15	0.053	1	0.007	0.091
S1B_630304003	1B	630304003	C	166	0.589	T	116	0.411	4	0.028	0.25
S1B_630501665	1B	630501665	C	166	0.589	A	116	0.411	4	0.028	0.25
S1B_630677363	1B	630677363	T	166	0.589	C	116	0.411	4	0.028	0.25
S1B_631203259	1B	631203259	T	156	0.553	C	126	0.447	4	0.028	0.25
S1B_631665988	1B	631665988	C	163	0.578	T	119	0.422	5	0.035	0.25
S1B_631718867	1B	631718867	C	267	0.947	G	15	0.053	1	0.007	0.091
S1B_631904677	1B	631904677	T	158	0.56	C	124	0.44	4	0.028	0.25
S1B_631967546	1B	631967546	C	265	0.94	G	17	0.06	1	0.007	0.1
S1B_632716137	1B	632716137	T	160	0.567	G	122	0.433	4	0.028	0.25
S1B_632863835	1B	632863835	G	149	0.528	C	133	0.472	7	0.05	0.25
S1B_634241696	1B	634241696	T	174	0.617	C	108	0.383	6	0.043	0.249
S1B_634242993	1B	634242993	C	196	0.695	A	86	0.305	6	0.043	0.244
S1B_634412306	1B	634412306	T	202	0.716	A	80	0.284	4	0.028	0.241
S1B_635869100	1B	635869100	G	223	0.791	A	59	0.209	1	0.007	0.221
S1B_635986644	1B	635986644	C	243	0.862	T	39	0.138	1	0.007	0.182
S1B_636061767	1B	636061767	C	212	0.752	T	70	0.248	4	0.028	0.234
S1B_636098920	1B	636098920	G	243	0.862	A	39	0.138	1	0.007	0.182
S1B_636129861	1B	636129861	A	231	0.819	G	51	0.181	7	0.05	0.209
S1B_636248373	1B	636248373	C	248	0.879	T	34	0.121	2	0.014	0.167
S1B_636818649	1B	636818649	T	175	0.621	A	107	0.379	3	0.021	0.249
S1B_636818689	1B	636818689	G	175	0.621	A	107	0.379	3	0.021	0.249
S1B_636840957	1B	636840957	A	176	0.624	G	106	0.376	4	0.028	0.249
S1B_636862149	1B	636862149	G	192	0.681	A	90	0.319	4	0.028	0.246
S1B_636964732	1B	636964732	G	187	0.663	A	95	0.337	5	0.035	0.247
S1B_637028228	1B	637028228	C	187	0.663	T	95	0.337	5	0.035	0.247
S1B_637030087	1B	637030087	A	187	0.663	T	95	0.337	5	0.035	0.247
S1B_637221804	1B	637221804	T	187	0.663	C	95	0.337	5	0.035	0.247
S1B_637367698	1B	637367698	A	197	0.699	G	85	0.301	5	0.035	0.244
S1B_637594410	1B	637594410	T	232	0.823	C	50	0.177	2	0.014	0.207
S1B_637816666	1B	637816666	C	192	0.681	G	90	0.319	4	0.028	0.246
S1B_637894381	1B	637894381	T	146	0.518	C	136	0.482	8	0.057	0.25
S1B_637901337	1B	637901337	A	150	0.532	G	132	0.468	6	0.043	0.25
S1B_637938406	1B	637938406	G	268	0.95	C	14	0.05	0	0	0.085
S1B_637949662	1B	637949662	T	185	0.656	A	97	0.344	3	0.021	0.248
S1B_638012348	1B	638012348	G	268	0.95	C	14	0.05	0	0	0.085
S1B_638012585	1B	638012585	T	268	0.95	C	14	0.05	0	0	0.085
S1B_639043667	1B	639043667	C	235	0.833	A	47	0.167	1	0.007	0.201
S1B_639415604	1B	639415604	C	164	0.582	G	118	0.418	6	0.043	0.25
S1B_639415692	1B	639415692	C	165	0.585	T	117	0.415	5	0.035	0.25
S1B_639426265	1B	639426265	G	235	0.833	A	47	0.167	1	0.007	0.201
S1B_639426310	1B	639426310	C	235	0.833	G	47	0.167	1	0.007	0.201
S1B_639448494	1B	639448494	G	252	0.894	A	30	0.106	2	0.014	0.154
S1B_639499619	1B	639499619	C	251	0.89	T	31	0.11	1	0.007	0.157
S1B_639941318	1B	639941318	C	252	0.894	T	30	0.106	2	0.014	0.154
S1B_640046872	1B	640046872	T	198	0.702	G	84	0.298	2	0.014	0.243
S1B_640073677	1B	640073677	G	249	0.883	A	33	0.117	1	0.007	0.164
S1B_640559774	1B	640559774	C	229	0.812	T	53	0.188	1	0.007	0.212
S1B_640605878	1B	640605878	C	235	0.833	T	47	0.167	1	0.007	0.201
S1B_640852054	1B	640852054	G	251	0.89	A	31	0.11	1	0.007	0.157
S1B_641207925	1B	641207925	G	153	0.543	A	129	0.457	5	0.035	0.25
S1B_641218839	1B	641218839	G	263	0.933	A	19	0.067	1	0.007	0.11
S1B_641519463	1B	641519463	T	158	0.56	G	124	0.44	6	0.043	0.25
S1B_641943575	1B	641943575	T	173	0.613	C	109	0.387	5	0.035	0.249
S1B_642491184	1B	642491184	C	242	0.858	G	40	0.142	2	0.014	0.184
S1B_642547687	1B	642547687	C	242	0.858	T	40	0.142	2	0.014	0.184
S1B_642650411	1B	642650411	A	242	0.858	G	40	0.142	2	0.014	0.184
S1B_642678709	1B	642678709	A	151	0.535	G	131	0.465	5	0.035	0.25
S1B_642986047	1B	642986047	A	173	0.613	C	109	0.387	5	0.035	0.249
S1B_643042812	1B	643042812	T	173	0.613	C	109	0.387	5	0.035	0.249
S1B_643177397	1B	643177397	A	152	0.539	C	130	0.461	4	0.028	0.25
S1B_643950901	1B	643950901	C	268	0.95	A	14	0.05	0	0	0.085
S1B_643950958	1B	643950958	G	142	0.504	A	140	0.496	4	0.028	0.25
S1B_644336649	1B	644336649	C	142	0.504	T	140	0.496	4	0.028	0.25
S1B_644448426	1B	644448426	A	142	0.504	T	140	0.496	4	0.028	0.25
S1B_644598814	1B	644598814	T	157	0.557	C	125	0.443	5	0.035	0.25
S1B_644799156	1B	644799156	G	157	0.557	C	125	0.443	5	0.035	0.25
S1B_645051143	1B	645051143	G	165	0.585	C	117	0.415	5	0.035	0.25
S1B_645278463	1B	645278463	A	149	0.528	G	133	0.472	5	0.035	0.25
S1B_645514214	1B	645514214	C	194	0.688	T	88	0.312	6	0.043	0.245
S1B_646167476	1B	646167476	A	172	0.61	G	110	0.39	6	0.043	0.249
S1B_646178542	1B	646178542	G	172	0.61	A	110	0.39	6	0.043	0.249
S1B_646466123	1B	646466123	C	260	0.922	T	22	0.078	0	0	0.123
S1B_646895451	1B	646895451	C	195	0.691	T	87	0.309	7	0.05	0.245
S1B_647195634	1B	647195634	A	150	0.532	C	132	0.468	6	0.043	0.25
S1B_653086336	1B	653086336	G	155	0.55	C	127	0.45	7	0.05	0.25
S1B_653223639	1B	653223639	C	156	0.553	T	126	0.447	6	0.043	0.25
S1B_653681771	1B	653681771	C	156	0.553	T	126	0.447	6	0.043	0.25
S1B_654052241	1B	654052241	G	245	0.869	A	37	0.131	1	0.007	0.176
S1B_654116824	1B	654116824	C	245	0.869	T	37	0.131	1	0.007	0.176
S1B_654535636	1B	654535636	G	157	0.557	C	125	0.443	3	0.021	0.25
S1B_654609783	1B	654609783	C	191	0.677	T	91	0.323	5	0.035	0.246
S1B_654915479	1B	654915479	C	153	0.543	T	129	0.457	7	0.05	0.25
S1B_655067795	1B	655067795	T	251	0.89	G	31	0.11	1	0.007	0.157
S1B_655342042	1B	655342042	G	251	0.89	A	31	0.11	1	0.007	0.157
S1B_655467626	1B	655467626	G	251	0.89	A	31	0.11	1	0.007	0.157
S1B_655839852	1B	655839852	T	241	0.855	G	41	0.145	1	0.007	0.187
S1B_655908290	1B	655908290	C	241	0.855	T	41	0.145	1	0.007	0.187
S1B_656070317	1B	656070317	C	241	0.855	T	41	0.145	1	0.007	0.187
S1B_656083100	1B	656083100	A	241	0.855	G	41	0.145	1	0.007	0.187
S1B_656394798	1B	656394798	C	241	0.855	A	41	0.145	1	0.007	0.187
S1B_656423128	1B	656423128	A	241	0.855	T	41	0.145	1	0.007	0.187
S1B_656450103	1B	656450103	G	241	0.855	A	41	0.145	1	0.007	0.187
S1B_656507627	1B	656507627	C	241	0.855	A	41	0.145	1	0.007	0.187
S1B_656666455	1B	656666455	C	241	0.855	A	41	0.145	1	0.007	0.187
S1B_657275462	1B	657275462	T	254	0.901	A	28	0.099	2	0.014	0.147
S1B_657283601	1B	657283601	C	251	0.89	A	31	0.11	1	0.007	0.157
S1B_658921256	1B	658921256	T	248	0.879	A	34	0.121	2	0.014	0.167
S1B_659660316	1B	659660316	A	177	0.628	G	105	0.372	7	0.05	0.249
S1B_659759447	1B	659759447	C	219	0.777	G	63	0.223	1	0.007	0.227
S1B_659785472	1B	659785472	G	219	0.777	A	63	0.223	1	0.007	0.227
S1B_659785536	1B	659785536	C	219	0.777	G	63	0.223	1	0.007	0.227
S1B_659985831	1B	659985831	T	219	0.777	C	63	0.223	1	0.007	0.227
S1B_660087597	1B	660087597	A	221	0.784	T	61	0.216	1	0.007	0.224
S1B_660091709	1B	660091709	G	256	0.908	A	26	0.092	2	0.014	0.139
S1B_660101401	1B	660101401	A	253	0.897	G	29	0.103	3	0.021	0.15
S1B_660463502	1B	660463502	G	228	0.809	A	54	0.191	0	0	0.214
S1B_660464530	1B	660464530	T	229	0.812	A	53	0.188	1	0.007	0.212
S1B_661192077	1B	661192077	C	249	0.883	G	33	0.117	1	0.007	0.164
S1B_661197648	1B	661197648	G	248	0.879	A	34	0.121	2	0.014	0.167
S1B_661418579	1B	661418579	C	248	0.879	T	34	0.121	2	0.014	0.167
S1B_662724244	1B	662724244	A	242	0.858	C	40	0.142	0	0	0.184
S1B_664776421	1B	664776421	A	243	0.862	G	39	0.138	1	0.007	0.182
S1B_665113216	1B	665113216	C	242	0.858	G	40	0.142	0	0	0.184
S1B_665462821	1B	665462821	G	259	0.918	A	23	0.082	3	0.021	0.127
S1B_665793223	1B	665793223	G	265	0.94	A	17	0.06	1	0.007	0.1
S1B_666029843	1B	666029843	A	265	0.94	G	17	0.06	1	0.007	0.1
S1B_666845808	1B	666845808	G	243	0.862	A	39	0.138	3	0.021	0.182
S1B_666942337	1B	666942337	A	241	0.855	G	41	0.145	3	0.021	0.187
S1B_669061352	1B	669061352	T	224	0.794	C	58	0.206	6	0.043	0.22
S1B_671273416	1B	671273416	C	249	0.883	T	33	0.117	1	0.007	0.164
S1B_672796005	1B	672796005	C	245	0.869	T	37	0.131	1	0.007	0.176
S1B_673174262	1B	673174262	G	245	0.869	A	37	0.131	1	0.007	0.176
S1B_673543498	1B	673543498	T	245	0.869	G	37	0.131	1	0.007	0.176
S1B_673569173	1B	673569173	G	245	0.869	A	37	0.131	1	0.007	0.176
S1B_673699294	1B	673699294	G	245	0.869	A	37	0.131	1	0.007	0.176
S1B_673924224	1B	673924224	T	252	0.894	C	30	0.106	4	0.028	0.154
S1B_673948840	1B	673948840	G	253	0.897	A	29	0.103	5	0.035	0.15
S1B_673961339	1B	673961339	T	247	0.876	C	35	0.124	1	0.007	0.17
S1B_673975509	1B	673975509	C	245	0.869	G	37	0.131	5	0.035	0.176
S1B_676260482	1B	676260482	G	244	0.865	T	38	0.135	0	0	0.179
S1B_676444939	1B	676444939	T	244	0.865	C	38	0.135	0	0	0.179
S1B_676474368	1B	676474368	G	242	0.858	T	40	0.142	0	0	0.184
S1B_676782576	1B	676782576	C	226	0.801	G	56	0.199	2	0.014	0.217
S1B_676812644	1B	676812644	C	230	0.816	G	52	0.184	2	0.014	0.21
S1B_677097053	1B	677097053	G	243	0.862	A	39	0.138	1	0.007	0.182
S1B_677297618	1B	677297618	T	242	0.858	C	40	0.142	2	0.014	0.184
S1B_678400174	1B	678400174	A	151	0.535	G	131	0.465	5	0.035	0.25
S1B_678405141	1B	678405141	G	156	0.553	A	126	0.447	6	0.043	0.25
S1B_678465602	1B	678465602	A	156	0.553	G	126	0.447	6	0.043	0.25
S1B_678813277	1B	678813277	A	156	0.553	G	126	0.447	6	0.043	0.25
S1B_678869963	1B	678869963	G	156	0.553	C	126	0.447	6	0.043	0.25
S1B_678910478	1B	678910478	T	156	0.553	C	126	0.447	6	0.043	0.25
S1B_679176976	1B	679176976	C	153	0.543	A	129	0.457	5	0.035	0.25
S1B_680160172	1B	680160172	G	267	0.947	A	15	0.053	1	0.007	0.091
S1B_680220844	1B	680220844	G	158	0.56	A	124	0.44	4	0.028	0.25
S1B_680969283	1B	680969283	C	174	0.617	A	108	0.383	4	0.028	0.249
S1B_680969378	1B	680969378	C	158	0.56	A	124	0.44	2	0.014	0.25
S1B_680969397	1B	680969397	A	172	0.61	G	110	0.39	4	0.028	0.249
S1B_680974918	1B	680974918	A	168	0.596	G	114	0.404	4	0.028	0.25
S1B_681077251	1B	681077251	A	148	0.525	G	134	0.475	4	0.028	0.25
S1B_681327508	1B	681327508	A	148	0.525	C	134	0.475	4	0.028	0.25
S1B_681550467	1B	681550467	T	146	0.518	G	136	0.482	4	0.028	0.25
S1B_681817273	1B	681817273	G	167	0.592	T	115	0.408	5	0.035	0.25
S1B_681834051	1B	681834051	C	167	0.592	A	115	0.408	5	0.035	0.25
S1B_683266424	1B	683266424	A	236	0.837	G	46	0.163	2	0.014	0.198
S1B_683306760	1B	683306760	G	236	0.837	A	46	0.163	2	0.014	0.198
S1B_686753081	1B	686753081	T	182	0.645	C	100	0.355	2	0.014	0.248
S1B_686867708	1B	686867708	G	182	0.645	C	100	0.355	2	0.014	0.248
S1B_686876645	1B	686876645	A	181	0.642	G	101	0.358	3	0.021	0.248
S1B_686994893	1B	686994893	T	179	0.635	C	103	0.365	5	0.035	0.249
S1B_687090072	1B	687090072	A	182	0.645	C	100	0.355	2	0.014	0.248
S1B_687536107	1B	687536107	C	144	0.511	A	138	0.489	4	0.028	0.25
S1B_687785608	1B	687785608	A	151	0.535	G	131	0.465	3	0.021	0.25
S1B_687796407	1B	687796407	G	152	0.539	A	130	0.461	4	0.028	0.25
S1B_687835789	1B	687835789	C	141	0.5	T	141	0.5	5	0.035	0.25
S1B_688096088	1B	688096088	C	141	0.5	T	141	0.5	5	0.035	0.25
S1B_688327586	1B	688327586	G	155	0.55	A	127	0.45	5	0.035	0.25
S1D_78777	1D	78777	G	260	0.922	A	22	0.078	4	0.028	0.123
S1D_2430803	1D	2430803	G	259	0.918	A	23	0.082	1	0.007	0.127
S1D_2444446	1D	2444446	G	257	0.911	T	25	0.089	1	0.007	0.135
S1D_2510391	1D	2510391	T	251	0.89	C	31	0.11	1	0.007	0.157
S1D_2517512	1D	2517512	T	257	0.911	C	25	0.089	1	0.007	0.135
S1D_2531230	1D	2531230	G	251	0.89	C	31	0.11	1	0.007	0.157
S1D_2691857	1D	2691857	T	251	0.89	C	31	0.11	1	0.007	0.157
S1D_2885037	1D	2885037	C	249	0.883	G	33	0.117	1	0.007	0.164
S1D_2948257	1D	2948257	G	249	0.883	T	33	0.117	1	0.007	0.164
S1D_3302167	1D	3302167	T	237	0.84	C	45	0.16	3	0.021	0.196
S1D_3324533	1D	3324533	C	266	0.943	A	16	0.057	2	0.014	0.096
S1D_3351098	1D	3351098	G	266	0.943	A	16	0.057	2	0.014	0.096
S1D_3460010	1D	3460010	A	262	0.929	G	20	0.071	2	0.014	0.114
S1D_3756690	1D	3756690	T	262	0.929	C	20	0.071	2	0.014	0.114
S1D_5162343	1D	5162343	T	262	0.929	G	20	0.071	2	0.014	0.114
S1D_6541259	1D	6541259	T	263	0.933	C	19	0.067	1	0.007	0.11
S1D_6715588	1D	6715588	C	263	0.933	G	19	0.067	1	0.007	0.11
S1D_7654848	1D	7654848	C	211	0.748	T	71	0.252	3	0.021	0.235
S1D_7837627	1D	7837627	T	202	0.716	A	80	0.284	2	0.014	0.241
S1D_8237892	1D	8237892	T	267	0.947	G	15	0.053	1	0.007	0.091
S1D_8259432	1D	8259432	T	267	0.947	C	15	0.053	1	0.007	0.091
S1D_8262656	1D	8262656	A	267	0.947	T	15	0.053	1	0.007	0.091
S1D_10627083	1D	10627083	G	227	0.805	A	55	0.195	3	0.021	0.215
S1D_11097633	1D	11097633	T	226	0.801	C	56	0.199	2	0.014	0.217
S1D_11523500	1D	11523500	G	231	0.819	A	51	0.181	3	0.021	0.209
S1D_11552706	1D	11552706	T	221	0.784	C	61	0.216	1	0.007	0.224
S1D_11646338	1D	11646338	A	210	0.745	C	72	0.255	2	0.014	0.236
S1D_11849919	1D	11849919	A	195	0.691	G	87	0.309	3	0.021	0.245
S1D_11880031	1D	11880031	A	197	0.699	G	85	0.301	3	0.021	0.244
S1D_12012665	1D	12012665	C	253	0.897	A	29	0.103	1	0.007	0.15
S1D_12932002	1D	12932002	G	246	0.872	C	36	0.128	2	0.014	0.173
S1D_16138055	1D	16138055	T	191	0.677	C	91	0.323	3	0.021	0.246
S1D_16213790	1D	16213790	C	192	0.681	T	90	0.319	2	0.014	0.246
S1D_16236062	1D	16236062	A	189	0.67	G	93	0.33	3	0.021	0.247
S1D_16770409	1D	16770409	G	189	0.67	C	93	0.33	3	0.021	0.247
S1D_16816301	1D	16816301	G	193	0.684	T	89	0.316	3	0.021	0.245
S1D_16816400	1D	16816400	A	193	0.684	G	89	0.316	3	0.021	0.245
S1D_16969859	1D	16969859	T	189	0.67	C	93	0.33	3	0.021	0.247
S1D_17048577	1D	17048577	T	214	0.759	C	68	0.241	4	0.028	0.232
S1D_17048630	1D	17048630	G	214	0.759	C	68	0.241	4	0.028	0.232
S1D_17652424	1D	17652424	T	193	0.684	C	89	0.316	3	0.021	0.245
S1D_17855465	1D	17855465	G	261	0.926	A	21	0.074	1	0.007	0.119
S1D_17969622	1D	17969622	A	259	0.918	G	23	0.082	1	0.007	0.127
S1D_18445755	1D	18445755	T	264	0.936	C	18	0.064	2	0.014	0.105
S1D_18994718	1D	18994718	A	263	0.933	G	19	0.067	5	0.035	0.11
S1D_20206796	1D	20206796	C	250	0.887	A	32	0.113	2	0.014	0.161
S1D_20311682	1D	20311682	T	259	0.918	C	23	0.082	1	0.007	0.127
S1D_20823322	1D	20823322	C	259	0.918	G	23	0.082	1	0.007	0.127
S1D_20873189	1D	20873189	C	259	0.918	T	23	0.082	1	0.007	0.127
S1D_20898473	1D	20898473	C	263	0.933	A	19	0.067	1	0.007	0.11
S1D_21146643	1D	21146643	T	259	0.918	C	23	0.082	1	0.007	0.127
S1D_21544688	1D	21544688	C	264	0.936	G	18	0.064	0	0	0.105
S1D_21641594	1D	21641594	G	263	0.933	A	19	0.067	1	0.007	0.11
S1D_21708513	1D	21708513	A	261	0.926	G	21	0.074	1	0.007	0.119
S1D_28214015	1D	28214015	T	173	0.613	A	109	0.387	5	0.035	0.249
S1D_28555237	1D	28555237	A	173	0.613	G	109	0.387	5	0.035	0.249
S1D_30389265	1D	30389265	A	180	0.638	G	102	0.362	6	0.043	0.249
S1D_41868257	1D	41868257	G	268	0.95	A	14	0.05	0	0	0.085
S1D_41915207	1D	41915207	A	268	0.95	C	14	0.05	0	0	0.085
S1D_42037079	1D	42037079	G	268	0.95	C	14	0.05	0	0	0.085
S1D_42141847	1D	42141847	C	268	0.95	A	14	0.05	0	0	0.085
S1D_42277512	1D	42277512	T	268	0.95	C	14	0.05	0	0	0.085
S1D_42484009	1D	42484009	T	268	0.95	C	14	0.05	0	0	0.085
S1D_42486030	1D	42486030	C	268	0.95	A	14	0.05	0	0	0.085
S1D_42767586	1D	42767586	T	268	0.95	C	14	0.05	0	0	0.085
S1D_42977190	1D	42977190	C	268	0.95	T	14	0.05	0	0	0.085
S1D_43145298	1D	43145298	C	268	0.95	T	14	0.05	0	0	0.085
S1D_43181363	1D	43181363	C	268	0.95	T	14	0.05	0	0	0.085
S1D_43279407	1D	43279407	C	268	0.95	T	14	0.05	0	0	0.085
S1D_43279601	1D	43279601	C	268	0.95	T	14	0.05	0	0	0.085
S1D_43689250	1D	43689250	G	268	0.95	A	14	0.05	0	0	0.085
S1D_45484751	1D	45484751	A	268	0.95	C	14	0.05	0	0	0.085
S1D_46097921	1D	46097921	T	268	0.95	G	14	0.05	0	0	0.085
S1D_46172319	1D	46172319	G	268	0.95	A	14	0.05	0	0	0.085
S1D_46223659	1D	46223659	T	268	0.95	C	14	0.05	0	0	0.085
S1D_46324848	1D	46324848	T	268	0.95	C	14	0.05	0	0	0.085
S1D_46337185	1D	46337185	A	268	0.95	T	14	0.05	0	0	0.085
S1D_46392867	1D	46392867	T	268	0.95	G	14	0.05	0	0	0.085
S1D_46475610	1D	46475610	G	268	0.95	A	14	0.05	0	0	0.085
S1D_46487145	1D	46487145	T	268	0.95	C	14	0.05	0	0	0.085
S1D_47414024	1D	47414024	G	268	0.95	A	14	0.05	0	0	0.085
S1D_48731140	1D	48731140	G	268	0.95	T	14	0.05	0	0	0.085
S1D_48736530	1D	48736530	A	268	0.95	G	14	0.05	0	0	0.085
S1D_57027944	1D	57027944	C	268	0.95	G	14	0.05	0	0	0.085
S1D_57229454	1D	57229454	G	268	0.95	A	14	0.05	0	0	0.085
S1D_57506439	1D	57506439	C	268	0.95	G	14	0.05	0	0	0.085
S1D_58124106	1D	58124106	A	268	0.95	G	14	0.05	0	0	0.085
S1D_58405070	1D	58405070	A	268	0.95	G	14	0.05	0	0	0.085
S1D_58620203	1D	58620203	T	268	0.95	C	14	0.05	0	0	0.085
S1D_63681750	1D	63681750	G	248	0.879	A	34	0.121	2	0.014	0.167
S1D_66823789	1D	66823789	G	157	0.557	A	125	0.443	1	0.007	0.25
S1D_69900386	1D	69900386	C	242	0.858	T	40	0.142	0	0	0.184
S1D_70562248	1D	70562248	C	242	0.858	A	40	0.142	0	0	0.184
S1D_72889936	1D	72889936	C	154	0.546	T	128	0.454	2	0.014	0.25
S1D_74032064	1D	74032064	C	154	0.546	A	128	0.454	2	0.014	0.25
S1D_81460628	1D	81460628	G	157	0.557	A	125	0.443	3	0.021	0.25
S1D_85723692	1D	85723692	C	235	0.833	T	47	0.167	3	0.021	0.201
S1D_89830054	1D	89830054	C	157	0.557	G	125	0.443	3	0.021	0.25
S1D_89835681	1D	89835681	T	244	0.865	A	38	0.135	0	0	0.179
S1D_90339361	1D	90339361	G	157	0.557	A	125	0.443	3	0.021	0.25
S1D_91044750	1D	91044750	T	157	0.557	G	125	0.443	3	0.021	0.25
S1D_99292499	1D	99292499	G	233	0.826	A	49	0.174	1	0.007	0.205
S1D_101560180	1D	101560180	T	159	0.564	C	123	0.436	3	0.021	0.25
S1D_104446884	1D	104446884	G	242	0.858	A	40	0.142	0	0	0.184
S1D_105344097	1D	105344097	G	233	0.826	A	49	0.174	1	0.007	0.205
S1D_111192630	1D	111192630	C	242	0.858	T	40	0.142	0	0	0.184
S1D_131862873	1D	131862873	A	224	0.794	T	58	0.206	2	0.014	0.22
S1D_134218013	1D	134218013	C	158	0.56	T	124	0.44	4	0.028	0.25
S1D_134773904	1D	134773904	C	235	0.833	T	47	0.167	3	0.021	0.201
S1D_135802744	1D	135802744	C	240	0.851	G	42	0.149	0	0	0.189
S1D_141006535	1D	141006535	G	241	0.855	A	41	0.145	1	0.007	0.187
S1D_143264063	1D	143264063	C	222	0.787	T	60	0.213	4	0.028	0.223
S1D_148941152	1D	148941152	C	157	0.557	A	125	0.443	3	0.021	0.25
S1D_157877412	1D	157877412	G	157	0.557	A	125	0.443	3	0.021	0.25
S1D_177974306	1D	177974306	G	225	0.798	A	57	0.202	3	0.021	0.219
S1D_184771327	1D	184771327	C	222	0.787	T	60	0.213	2	0.014	0.223
S1D_193726555	1D	193726555	C	224	0.794	T	58	0.206	2	0.014	0.22
S1D_196096385	1D	196096385	T	242	0.858	C	40	0.142	2	0.014	0.184
S1D_236060851	1D	236060851	A	223	0.791	G	59	0.209	9	0.064	0.221
S1D_252633538	1D	252633538	T	185	0.656	A	97	0.344	3	0.021	0.248
S1D_261556509	1D	261556509	C	181	0.642	A	101	0.358	3	0.021	0.248
S1D_262327291	1D	262327291	G	235	0.833	T	47	0.167	3	0.021	0.201
S1D_273680980	1D	273680980	C	178	0.631	T	104	0.369	2	0.014	0.249
S1D_326467481	1D	326467481	G	201	0.713	T	81	0.287	3	0.021	0.242
S1D_341027597	1D	341027597	G	173	0.613	A	109	0.387	5	0.035	0.249
S1D_342880050	1D	342880050	G	199	0.706	A	83	0.294	7	0.05	0.243
S1D_346185917	1D	346185917	G	183	0.649	A	99	0.351	5	0.035	0.248
S1D_353569941	1D	353569941	C	175	0.621	T	107	0.379	5	0.035	0.249
S1D_353913871	1D	353913871	G	175	0.621	A	107	0.379	5	0.035	0.249
S1D_363251633	1D	363251633	G	195	0.691	C	87	0.309	5	0.035	0.245
S1D_408525756	1D	408525756	C	250	0.887	T	32	0.113	2	0.014	0.161
S1D_408557735	1D	408557735	C	250	0.887	G	32	0.113	2	0.014	0.161
S1D_408574595	1D	408574595	A	250	0.887	G	32	0.113	2	0.014	0.161
S1D_408625272	1D	408625272	A	250	0.887	G	32	0.113	2	0.014	0.161
S1D_408625498	1D	408625498	T	250	0.887	C	32	0.113	2	0.014	0.161
S1D_408708457	1D	408708457	A	250	0.887	G	32	0.113	2	0.014	0.161
S1D_408740903	1D	408740903	C	250	0.887	A	32	0.113	2	0.014	0.161
S1D_408797196	1D	408797196	A	250	0.887	G	32	0.113	2	0.014	0.161
S1D_408806934	1D	408806934	T	250	0.887	C	32	0.113	2	0.014	0.161
S1D_409346112	1D	409346112	T	249	0.883	C	33	0.117	1	0.007	0.164
S1D_409960728	1D	409960728	A	249	0.883	G	33	0.117	1	0.007	0.164
S1D_410797687	1D	410797687	C	249	0.883	T	33	0.117	1	0.007	0.164
S1D_411063068	1D	411063068	A	249	0.883	T	33	0.117	1	0.007	0.164
S1D_411063636	1D	411063636	A	249	0.883	C	33	0.117	1	0.007	0.164
S1D_411189488	1D	411189488	G	249	0.883	C	33	0.117	1	0.007	0.164
S1D_411526130	1D	411526130	C	248	0.879	A	34	0.121	0	0	0.167
S1D_411724142	1D	411724142	G	249	0.883	A	33	0.117	1	0.007	0.164
S1D_411731821	1D	411731821	T	248	0.879	G	34	0.121	0	0	0.167
S1D_411733574	1D	411733574	A	248	0.879	G	34	0.121	0	0	0.167
S1D_412169433	1D	412169433	A	249	0.883	G	33	0.117	1	0.007	0.164
S1D_412169869	1D	412169869	T	249	0.883	C	33	0.117	1	0.007	0.164
S1D_412234989	1D	412234989	A	249	0.883	T	33	0.117	1	0.007	0.164
S1D_412457553	1D	412457553	G	249	0.883	C	33	0.117	1	0.007	0.164
S1D_412459561	1D	412459561	T	249	0.883	C	33	0.117	1	0.007	0.164
S1D_412504493	1D	412504493	G	249	0.883	C	33	0.117	1	0.007	0.164
S1D_412506833	1D	412506833	C	249	0.883	T	33	0.117	1	0.007	0.164
S1D_412785032	1D	412785032	C	249	0.883	T	33	0.117	1	0.007	0.164
S1D_413224919	1D	413224919	T	248	0.879	C	34	0.121	0	0	0.167
S1D_413297097	1D	413297097	C	248	0.879	G	34	0.121	0	0	0.167
S1D_413406182	1D	413406182	A	250	0.887	T	32	0.113	2	0.014	0.161
S1D_413406197	1D	413406197	A	250	0.887	T	32	0.113	2	0.014	0.161
S1D_413811228	1D	413811228	G	250	0.887	A	32	0.113	2	0.014	0.161
S1D_414898399	1D	414898399	G	249	0.883	A	33	0.117	1	0.007	0.164
S1D_415539797	1D	415539797	T	249	0.883	C	33	0.117	1	0.007	0.164
S1D_415543991	1D	415543991	G	249	0.883	A	33	0.117	1	0.007	0.164
S1D_415646908	1D	415646908	T	247	0.876	C	35	0.124	1	0.007	0.17
S1D_415773543	1D	415773543	T	247	0.876	G	35	0.124	1	0.007	0.17
S1D_415802141	1D	415802141	C	247	0.876	T	35	0.124	1	0.007	0.17
S1D_415802223	1D	415802223	C	247	0.876	T	35	0.124	1	0.007	0.17
S1D_415805501	1D	415805501	A	247	0.876	G	35	0.124	1	0.007	0.17
S1D_415987273	1D	415987273	G	247	0.876	A	35	0.124	1	0.007	0.17
S1D_416132828	1D	416132828	T	248	0.879	C	34	0.121	2	0.014	0.167
S1D_416267345	1D	416267345	A	248	0.879	G	34	0.121	2	0.014	0.167
S1D_416269827	1D	416269827	T	248	0.879	A	34	0.121	2	0.014	0.167
S1D_416355573	1D	416355573	C	249	0.883	G	33	0.117	1	0.007	0.164
S1D_416356089	1D	416356089	G	249	0.883	A	33	0.117	1	0.007	0.164
S1D_416403815	1D	416403815	G	249	0.883	C	33	0.117	1	0.007	0.164
S1D_416665644	1D	416665644	A	259	0.918	C	23	0.082	1	0.007	0.127
S1D_416707004	1D	416707004	C	259	0.918	A	23	0.082	1	0.007	0.127
S1D_416755474	1D	416755474	C	259	0.918	T	23	0.082	1	0.007	0.127
S1D_416850312	1D	416850312	T	267	0.947	C	15	0.053	1	0.007	0.091
S1D_416926091	1D	416926091	C	259	0.918	T	23	0.082	1	0.007	0.127
S1D_417084381	1D	417084381	C	259	0.918	G	23	0.082	1	0.007	0.127
S1D_418234257	1D	418234257	G	259	0.918	A	23	0.082	1	0.007	0.127
S1D_418296747	1D	418296747	C	259	0.918	T	23	0.082	1	0.007	0.127
S1D_418517791	1D	418517791	G	259	0.918	T	23	0.082	1	0.007	0.127
S1D_418517994	1D	418517994	T	260	0.922	C	22	0.078	2	0.014	0.123
S1D_418529886	1D	418529886	C	260	0.922	T	22	0.078	2	0.014	0.123
S1D_418529935	1D	418529935	T	260	0.922	C	22	0.078	2	0.014	0.123
S1D_418530005	1D	418530005	G	260	0.922	T	22	0.078	2	0.014	0.123
S1D_418635919	1D	418635919	C	259	0.918	G	23	0.082	1	0.007	0.127
S1D_419994519	1D	419994519	A	259	0.918	C	23	0.082	3	0.021	0.127
S1D_420566699	1D	420566699	A	259	0.918	G	23	0.082	3	0.021	0.127
S1D_420647502	1D	420647502	C	259	0.918	T	23	0.082	3	0.021	0.127
S1D_420713054	1D	420713054	C	259	0.918	G	23	0.082	3	0.021	0.127
S1D_420778801	1D	420778801	T	259	0.918	C	23	0.082	3	0.021	0.127
S1D_420925374	1D	420925374	G	259	0.918	C	23	0.082	3	0.021	0.127
S1D_422837868	1D	422837868	G	260	0.922	A	22	0.078	2	0.014	0.123
S1D_423671319	1D	423671319	T	260	0.922	A	22	0.078	2	0.014	0.123
S1D_424598075	1D	424598075	C	263	0.933	T	19	0.067	1	0.007	0.11
S1D_424990054	1D	424990054	G	263	0.933	A	19	0.067	1	0.007	0.11
S1D_426745734	1D	426745734	A	263	0.933	G	19	0.067	1	0.007	0.11
S1D_426925935	1D	426925935	T	263	0.933	C	19	0.067	1	0.007	0.11
S1D_426926011	1D	426926011	A	263	0.933	T	19	0.067	1	0.007	0.11
S1D_426987479	1D	426987479	T	263	0.933	C	19	0.067	1	0.007	0.11
S1D_426987578	1D	426987578	C	263	0.933	T	19	0.067	1	0.007	0.11
S1D_427039535	1D	427039535	C	263	0.933	A	19	0.067	1	0.007	0.11
S1D_427768133	1D	427768133	G	263	0.933	A	19	0.067	1	0.007	0.11
S1D_427828445	1D	427828445	C	264	0.936	G	18	0.064	2	0.014	0.105
S1D_427868715	1D	427868715	C	263	0.933	G	19	0.067	1	0.007	0.11
S1D_428055151	1D	428055151	A	263	0.933	C	19	0.067	1	0.007	0.11
S1D_428197708	1D	428197708	T	263	0.933	C	19	0.067	1	0.007	0.11
S1D_428586104	1D	428586104	A	263	0.933	G	19	0.067	1	0.007	0.11
S1D_429030033	1D	429030033	A	263	0.933	G	19	0.067	1	0.007	0.11
S1D_429030067	1D	429030067	A	263	0.933	G	19	0.067	1	0.007	0.11
S1D_429686737	1D	429686737	C	263	0.933	T	19	0.067	1	0.007	0.11
S1D_430982345	1D	430982345	G	263	0.933	A	19	0.067	1	0.007	0.11
S1D_431523575	1D	431523575	G	265	0.94	A	17	0.06	1	0.007	0.1
S1D_431704161	1D	431704161	C	265	0.94	G	17	0.06	1	0.007	0.1
S1D_431715866	1D	431715866	C	265	0.94	A	17	0.06	1	0.007	0.1
S1D_432315378	1D	432315378	A	265	0.94	G	17	0.06	1	0.007	0.1
S1D_432331357	1D	432331357	T	257	0.911	C	25	0.089	1	0.007	0.135
S1D_432404758	1D	432404758	T	257	0.911	A	25	0.089	1	0.007	0.135
S1D_432638693	1D	432638693	G	257	0.911	C	25	0.089	1	0.007	0.135
S1D_432801197	1D	432801197	A	257	0.911	G	25	0.089	1	0.007	0.135
S1D_432951682	1D	432951682	C	257	0.911	T	25	0.089	1	0.007	0.135
S1D_433030657	1D	433030657	A	257	0.911	G	25	0.089	1	0.007	0.135
S1D_433032839	1D	433032839	A	257	0.911	G	25	0.089	1	0.007	0.135
S1D_433190173	1D	433190173	T	257	0.911	C	25	0.089	1	0.007	0.135
S1D_433254100	1D	433254100	A	257	0.911	G	25	0.089	1	0.007	0.135
S1D_433266932	1D	433266932	T	257	0.911	C	25	0.089	1	0.007	0.135
S1D_433371368	1D	433371368	G	257	0.911	C	25	0.089	1	0.007	0.135
S1D_433371393	1D	433371393	G	257	0.911	C	25	0.089	1	0.007	0.135
S1D_433511880	1D	433511880	G	265	0.94	A	17	0.06	1	0.007	0.1
S1D_433912142	1D	433912142	A	265	0.94	G	17	0.06	1	0.007	0.1
S1D_435048900	1D	435048900	G	165	0.585	A	117	0.415	7	0.05	0.25
S1D_435259003	1D	435259003	A	165	0.585	G	117	0.415	7	0.05	0.25
S1D_435465609	1D	435465609	C	167	0.592	T	115	0.408	7	0.05	0.25
S1D_435465635	1D	435465635	A	166	0.589	C	116	0.411	6	0.043	0.25
S1D_452420392	1D	452420392	G	231	0.819	T	51	0.181	7	0.05	0.209
S1D_454809902	1D	454809902	C	231	0.819	T	51	0.181	7	0.05	0.209
S1D_472186628	1D	472186628	A	255	0.904	T	27	0.096	3	0.021	0.143
S1D_484868196	1D	484868196	G	143	0.507	A	139	0.493	3	0.021	0.25
S1D_485043585	1D	485043585	C	143	0.507	T	139	0.493	3	0.021	0.25
S1D_487954983	1D	487954983	T	143	0.507	C	139	0.493	3	0.021	0.25
S1D_491039653	1D	491039653	T	143	0.507	G	139	0.493	3	0.021	0.25
S1D_491588890	1D	491588890	T	143	0.507	C	139	0.493	3	0.021	0.25
S1D_491646345	1D	491646345	C	143	0.507	G	139	0.493	3	0.021	0.25
S1D_491795548	1D	491795548	G	143	0.507	C	139	0.493	3	0.021	0.25
S1D_492641722	1D	492641722	C	144	0.511	A	138	0.489	4	0.028	0.25
S1D_492890169	1D	492890169	G	146	0.518	A	136	0.482	2	0.014	0.25
S1D_492890171	1D	492890171	T	146	0.518	C	136	0.482	2	0.014	0.25
S1D_493637575	1D	493637575	G	146	0.518	A	136	0.482	2	0.014	0.25
S1D_493764968	1D	493764968	G	145	0.514	T	137	0.486	3	0.021	0.25
S1D_493978993	1D	493978993	C	146	0.518	A	136	0.482	2	0.014	0.25
S2A_718152	2A	718152	C	238	0.844	T	44	0.156	4	0.028	0.194
S2A_735436	2A	735436	T	238	0.844	A	44	0.156	4	0.028	0.194
S2A_1686041	2A	1686041	G	237	0.84	C	45	0.16	5	0.035	0.196
S2A_1872142	2A	1872142	T	237	0.84	G	45	0.16	5	0.035	0.196
S2A_1926900	2A	1926900	A	237	0.84	G	45	0.16	5	0.035	0.196
S2A_2367215	2A	2367215	C	237	0.84	A	45	0.16	5	0.035	0.196
S2A_2800711	2A	2800711	A	235	0.833	G	47	0.167	3	0.021	0.201
S2A_2998843	2A	2998843	T	235	0.833	A	47	0.167	3	0.021	0.201
S2A_4942949	2A	4942949	C	233	0.826	T	49	0.174	3	0.021	0.205
S2A_5690533	2A	5690533	A	228	0.809	G	54	0.191	4	0.028	0.214
S2A_8142744	2A	8142744	A	236	0.837	G	46	0.163	4	0.028	0.198
S2A_8142822	2A	8142822	C	261	0.926	T	21	0.074	3	0.021	0.119
S2A_8143095	2A	8143095	A	265	0.94	G	17	0.06	3	0.021	0.1
S2A_8143130	2A	8143130	C	265	0.94	G	17	0.06	3	0.021	0.1
S2A_8143171	2A	8143171	G	237	0.84	C	45	0.16	5	0.035	0.196
S2A_9121927	2A	9121927	T	253	0.897	A	29	0.103	1	0.007	0.15
S2A_11845324	2A	11845324	G	237	0.84	T	45	0.16	3	0.021	0.196
S2A_13121298	2A	13121298	T	233	0.826	C	49	0.174	3	0.021	0.205
S2A_13135933	2A	13135933	C	239	0.848	T	43	0.152	5	0.035	0.192
S2A_14025753	2A	14025753	A	239	0.848	T	43	0.152	5	0.035	0.192
S2A_14215359	2A	14215359	C	238	0.844	T	44	0.156	4	0.028	0.194
S2A_14418760	2A	14418760	A	238	0.844	G	44	0.156	6	0.043	0.194
S2A_14978553	2A	14978553	T	240	0.851	C	42	0.149	4	0.028	0.189
S2A_15449240	2A	15449240	C	240	0.851	G	42	0.149	4	0.028	0.189
S2A_15755581	2A	15755581	A	241	0.855	G	41	0.145	3	0.021	0.187
S2A_15962301	2A	15962301	T	240	0.851	C	42	0.149	4	0.028	0.189
S2A_16617246	2A	16617246	A	240	0.851	C	42	0.149	4	0.028	0.189
S2A_16629866	2A	16629866	A	233	0.826	G	49	0.174	3	0.021	0.205
S2A_17830617	2A	17830617	T	241	0.855	C	41	0.145	3	0.021	0.187
S2A_18468495	2A	18468495	C	241	0.855	G	41	0.145	3	0.021	0.187
S2A_18495181	2A	18495181	G	240	0.851	C	42	0.149	4	0.028	0.189
S2A_19049803	2A	19049803	G	239	0.848	A	43	0.152	5	0.035	0.192
S2A_19478185	2A	19478185	A	238	0.844	G	44	0.156	4	0.028	0.194
S2A_19902461	2A	19902461	C	239	0.848	T	43	0.152	5	0.035	0.192
S2A_24002740	2A	24002740	A	238	0.844	G	44	0.156	2	0.014	0.194
S2A_28784613	2A	28784613	C	189	0.67	T	93	0.33	7	0.05	0.247
S2A_29263678	2A	29263678	C	268	0.95	T	14	0.05	0	0	0.085
S2A_29263759	2A	29263759	G	268	0.95	C	14	0.05	0	0	0.085
S2A_30132371	2A	30132371	C	243	0.862	T	39	0.138	1	0.007	0.182
S2A_30172079	2A	30172079	G	247	0.876	A	35	0.124	1	0.007	0.17
S2A_30330014	2A	30330014	A	255	0.904	G	27	0.096	1	0.007	0.143
S2A_30664232	2A	30664232	A	239	0.848	G	43	0.152	1	0.007	0.192
S2A_30823336	2A	30823336	T	239	0.848	C	43	0.152	1	0.007	0.192
S2A_30859144	2A	30859144	T	239	0.848	C	43	0.152	1	0.007	0.192
S2A_31045480	2A	31045480	A	239	0.848	G	43	0.152	1	0.007	0.192
S2A_31202596	2A	31202596	T	255	0.904	C	27	0.096	1	0.007	0.143
S2A_31285698	2A	31285698	G	255	0.904	A	27	0.096	1	0.007	0.143
S2A_31851904	2A	31851904	G	251	0.89	A	31	0.11	1	0.007	0.157
S2A_31906455	2A	31906455	C	239	0.848	T	43	0.152	1	0.007	0.192
S2A_31950515	2A	31950515	A	218	0.773	G	64	0.227	2	0.014	0.228
S2A_32024727	2A	32024727	T	240	0.851	C	42	0.149	0	0	0.189
S2A_32029594	2A	32029594	A	250	0.887	G	32	0.113	0	0	0.161
S2A_32269330	2A	32269330	A	240	0.851	G	42	0.149	0	0	0.189
S2A_32513895	2A	32513895	A	250	0.887	G	32	0.113	0	0	0.161
S2A_32542114	2A	32542114	G	250	0.887	A	32	0.113	0	0	0.161
S2A_32554950	2A	32554950	A	241	0.855	G	41	0.145	1	0.007	0.187
S2A_32554951	2A	32554951	C	249	0.883	A	33	0.117	1	0.007	0.164
S2A_32773718	2A	32773718	C	249	0.883	T	33	0.117	1	0.007	0.164
S2A_32876062	2A	32876062	T	221	0.784	A	61	0.216	1	0.007	0.224
S2A_32886636	2A	32886636	G	241	0.855	A	41	0.145	1	0.007	0.187
S2A_32886829	2A	32886829	C	221	0.784	T	61	0.216	1	0.007	0.224
S2A_32886834	2A	32886834	T	241	0.855	C	41	0.145	1	0.007	0.187
S2A_32914014	2A	32914014	C	221	0.784	T	61	0.216	1	0.007	0.224
S2A_32931527	2A	32931527	C	241	0.855	G	41	0.145	1	0.007	0.187
S2A_32931719	2A	32931719	C	249	0.883	A	33	0.117	1	0.007	0.164
S2A_32942025	2A	32942025	G	241	0.855	A	41	0.145	1	0.007	0.187
S2A_32942027	2A	32942027	G	249	0.883	A	33	0.117	1	0.007	0.164
S2A_32942761	2A	32942761	A	249	0.883	G	33	0.117	1	0.007	0.164
S2A_33043062	2A	33043062	G	254	0.901	A	28	0.099	0	0	0.147
S2A_33177689	2A	33177689	T	241	0.855	C	41	0.145	1	0.007	0.187
S2A_33177691	2A	33177691	C	151	0.535	T	131	0.465	3	0.021	0.25
S2A_33288819	2A	33288819	T	250	0.887	A	32	0.113	0	0	0.161
S2A_33343865	2A	33343865	G	254	0.901	A	28	0.099	0	0	0.147
S2A_33905943	2A	33905943	T	240	0.851	C	42	0.149	0	0	0.189
S2A_34235905	2A	34235905	C	195	0.691	T	87	0.309	1	0.007	0.245
S2A_35574163	2A	35574163	G	166	0.589	A	116	0.411	2	0.014	0.25
S2A_35639016	2A	35639016	G	253	0.897	T	29	0.103	1	0.007	0.15
S2A_35658183	2A	35658183	G	147	0.521	A	135	0.479	3	0.021	0.25
S2A_35658212	2A	35658212	C	237	0.84	T	45	0.16	1	0.007	0.196
S2A_35786664	2A	35786664	C	164	0.582	T	118	0.418	0	0	0.25
S2A_35952093	2A	35952093	C	262	0.929	T	20	0.071	0	0	0.114
S2A_36036421	2A	36036421	G	146	0.518	A	136	0.482	0	0	0.25
S2A_36134675	2A	36134675	G	146	0.518	A	136	0.482	0	0	0.25
S2A_36234797	2A	36234797	G	146	0.518	A	136	0.482	0	0	0.25
S2A_36391973	2A	36391973	G	264	0.936	T	18	0.064	0	0	0.105
S2A_36517581	2A	36517581	T	264	0.936	C	18	0.064	0	0	0.105
S2A_36718999	2A	36718999	C	264	0.936	T	18	0.064	0	0	0.105
S2A_36719038	2A	36719038	C	264	0.936	G	18	0.064	0	0	0.105
S2A_38918151	2A	38918151	G	264	0.936	A	18	0.064	0	0	0.105
S2A_39230732	2A	39230732	C	165	0.585	T	117	0.415	1	0.007	0.25
S2A_41153975	2A	41153975	G	164	0.582	A	118	0.418	2	0.014	0.25
S2A_41154013	2A	41154013	G	163	0.578	A	119	0.422	3	0.021	0.25
S2A_41173033	2A	41173033	A	164	0.582	G	118	0.418	2	0.014	0.25
S2A_41224254	2A	41224254	T	163	0.578	C	119	0.422	3	0.021	0.25
S2A_42193487	2A	42193487	T	239	0.848	A	43	0.152	1	0.007	0.192
S2A_42193902	2A	42193902	C	238	0.844	T	44	0.156	2	0.014	0.194
S2A_42194536	2A	42194536	G	236	0.837	C	46	0.163	2	0.014	0.198
S2A_42194544	2A	42194544	T	238	0.844	C	44	0.156	2	0.014	0.194
S2A_42334198	2A	42334198	A	236	0.837	G	46	0.163	2	0.014	0.198
S2A_42486389	2A	42486389	C	227	0.805	A	55	0.195	3	0.021	0.215
S2A_43045646	2A	43045646	C	225	0.798	T	57	0.202	3	0.021	0.219
S2A_43287532	2A	43287532	T	166	0.589	A	116	0.411	2	0.014	0.25
S2A_43291973	2A	43291973	G	162	0.574	C	120	0.426	2	0.014	0.25
S2A_43450177	2A	43450177	G	177	0.628	T	105	0.372	1	0.007	0.249
S2A_43474550	2A	43474550	T	177	0.628	C	105	0.372	1	0.007	0.249
S2A_43476984	2A	43476984	G	181	0.642	A	101	0.358	1	0.007	0.248
S2A_43477026	2A	43477026	G	177	0.628	A	105	0.372	1	0.007	0.249
S2A_45084261	2A	45084261	C	238	0.844	T	44	0.156	2	0.014	0.194
S2A_45101994	2A	45101994	G	235	0.833	A	47	0.167	3	0.021	0.201
S2A_47706511	2A	47706511	C	237	0.84	G	45	0.16	1	0.007	0.196
S2A_47779734	2A	47779734	C	237	0.84	A	45	0.16	1	0.007	0.196
S2A_47781717	2A	47781717	A	237	0.84	G	45	0.16	1	0.007	0.196
S2A_47826097	2A	47826097	C	237	0.84	T	45	0.16	1	0.007	0.196
S2A_48176393	2A	48176393	C	223	0.791	T	59	0.209	1	0.007	0.221
S2A_49843369	2A	49843369	T	217	0.769	C	65	0.231	1	0.007	0.229
S2A_50074106	2A	50074106	T	216	0.766	C	66	0.234	2	0.014	0.23
S2A_51261974	2A	51261974	A	223	0.791	G	59	0.209	1	0.007	0.221
S2A_52273147	2A	52273147	T	259	0.918	C	23	0.082	1	0.007	0.127
S2A_54690566	2A	54690566	G	248	0.879	T	34	0.121	2	0.014	0.167
S2A_54842610	2A	54842610	G	240	0.851	A	42	0.149	4	0.028	0.189
S2A_57531451	2A	57531451	G	198	0.702	A	84	0.298	4	0.028	0.243
S2A_57575537	2A	57575537	T	198	0.702	C	84	0.298	4	0.028	0.243
S2A_57671568	2A	57671568	A	198	0.702	G	84	0.298	4	0.028	0.243
S2A_57829714	2A	57829714	G	198	0.702	C	84	0.298	4	0.028	0.243
S2A_57837087	2A	57837087	C	198	0.702	G	84	0.298	4	0.028	0.243
S2A_57840174	2A	57840174	A	198	0.702	G	84	0.298	4	0.028	0.243
S2A_57855432	2A	57855432	T	198	0.702	G	84	0.298	4	0.028	0.243
S2A_57864339	2A	57864339	C	198	0.702	T	84	0.298	4	0.028	0.243
S2A_57924183	2A	57924183	G	157	0.557	A	125	0.443	1	0.007	0.25
S2A_58386915	2A	58386915	A	242	0.858	C	40	0.142	0	0	0.184
S2A_58668062	2A	58668062	C	246	0.872	T	36	0.128	0	0	0.173
S2A_58707220	2A	58707220	T	190	0.674	C	92	0.326	2	0.014	0.246
S2A_58955573	2A	58955573	G	190	0.674	A	92	0.326	2	0.014	0.246
S2A_58956464	2A	58956464	A	190	0.674	G	92	0.326	2	0.014	0.246
S2A_59162975	2A	59162975	C	251	0.89	T	31	0.11	1	0.007	0.157
S2A_59378923	2A	59378923	C	148	0.525	T	134	0.475	4	0.028	0.25
S2A_59729258	2A	59729258	T	180	0.638	C	102	0.362	2	0.014	0.249
S2A_59755586	2A	59755586	G	180	0.638	A	102	0.362	2	0.014	0.249
S2A_59987671	2A	59987671	A	180	0.638	G	102	0.362	2	0.014	0.249
S2A_60075211	2A	60075211	A	180	0.638	G	102	0.362	2	0.014	0.249
S2A_60119622	2A	60119622	C	180	0.638	G	102	0.362	2	0.014	0.249
S2A_60798187	2A	60798187	C	180	0.638	A	102	0.362	2	0.014	0.249
S2A_61473649	2A	61473649	G	180	0.638	A	102	0.362	2	0.014	0.249
S2A_61474208	2A	61474208	C	180	0.638	T	102	0.362	2	0.014	0.249
S2A_62208181	2A	62208181	G	240	0.851	A	42	0.149	2	0.014	0.189
S2A_65102491	2A	65102491	T	182	0.645	C	100	0.355	2	0.014	0.248
S2A_65349268	2A	65349268	G	214	0.759	A	68	0.241	6	0.043	0.232
S2A_65459491	2A	65459491	C	182	0.645	T	100	0.355	2	0.014	0.248
S2A_65950702	2A	65950702	T	182	0.645	G	100	0.355	2	0.014	0.248
S2A_66003400	2A	66003400	T	182	0.645	C	100	0.355	2	0.014	0.248
S2A_66307730	2A	66307730	T	189	0.67	C	93	0.33	3	0.021	0.247
S2A_66318634	2A	66318634	C	182	0.645	T	100	0.355	2	0.014	0.248
S2A_68089114	2A	68089114	A	182	0.645	C	100	0.355	2	0.014	0.248
S2A_70234764	2A	70234764	G	248	0.879	C	34	0.121	0	0	0.167
S2A_70364781	2A	70364781	A	254	0.901	G	28	0.099	0	0	0.147
S2A_70708602	2A	70708602	T	248	0.879	C	34	0.121	0	0	0.167
S2A_71077196	2A	71077196	G	235	0.833	A	47	0.167	3	0.021	0.201
S2A_71172041	2A	71172041	C	234	0.83	T	48	0.17	4	0.028	0.203
S2A_73170638	2A	73170638	G	249	0.883	T	33	0.117	1	0.007	0.164
S2A_73179800	2A	73179800	T	249	0.883	C	33	0.117	1	0.007	0.164
S2A_74099133	2A	74099133	T	247	0.876	C	35	0.124	1	0.007	0.17
S2A_74554152	2A	74554152	C	247	0.876	G	35	0.124	1	0.007	0.17
S2A_74960064	2A	74960064	C	247	0.876	T	35	0.124	1	0.007	0.17
S2A_75591139	2A	75591139	C	247	0.876	G	35	0.124	1	0.007	0.17
S2A_75644909	2A	75644909	G	247	0.876	T	35	0.124	1	0.007	0.17
S2A_76134343	2A	76134343	T	247	0.876	C	35	0.124	1	0.007	0.17
S2A_77151770	2A	77151770	C	247	0.876	T	35	0.124	1	0.007	0.17
S2A_77537641	2A	77537641	T	245	0.869	C	37	0.131	1	0.007	0.176
S2A_77744254	2A	77744254	G	245	0.869	A	37	0.131	1	0.007	0.176
S2A_78063670	2A	78063670	C	245	0.869	T	37	0.131	1	0.007	0.176
S2A_78238861	2A	78238861	G	262	0.929	A	20	0.071	2	0.014	0.114
S2A_78756138	2A	78756138	G	245	0.869	A	37	0.131	1	0.007	0.176
S2A_78850135	2A	78850135	A	245	0.869	T	37	0.131	1	0.007	0.176
S2A_78901346	2A	78901346	T	245	0.869	C	37	0.131	1	0.007	0.176
S2A_80236845	2A	80236845	G	245	0.869	A	37	0.131	1	0.007	0.176
S2A_80849478	2A	80849478	C	243	0.862	T	39	0.138	3	0.021	0.182
S2A_82068029	2A	82068029	T	157	0.557	A	125	0.443	3	0.021	0.25
[truncated: 12,564 more rows]
