# Supplementary material for: Elucidating SNP-based genetic diversity and population structure of advanced breeding lines of bread wheat (Triticum aestivum L.)
Source: PeerJ. 2021 Jun 22;9:e11593. doi: 10.7717/peerj.11593 (PMC8231316; doi:10.7717/peerj.11593)
Supplement: Supplemental Information 3 [file peerj-09-11593-s003.xlsx]

## Sheet: summary_genotypes
Taxa Name	Number of Sites	Number Heterozygous	Proportion Heterozygous
GID304660	14563	883	0.06063
GID6175067	14563	72	0.00494
GID6341870	14563	240	0.01648
GID7310216	14563	270	0.01854
GID7310280	14563	231	0.01586
GID7310282	14563	477	0.03275
GID7310423	14563	368	0.02527
GID7310704	14563	279	0.01916
GID7310723	14563	136	0.00934
GID7310785	14563	114	0.00783
GID7310807	14563	402	0.0276
GID7310835	14563	163	0.01119
GID7310893	14563	628	0.04312
GID7310905	14563	366	0.02513
GID7311040	14563	230	0.01579
GID7311077	14563	257	0.01765
GID7311612	14563	59	0.00405
GID7311894	14563	147	0.01009
GID7311895	14563	363	0.02493
GID7312223	14563	443	0.03042
GID7312360	14563	237	0.01627
GID7312378	14563	260	0.01785
GID7312934	14563	91	0.00625
GID7312955	14563	287	0.01971
GID7313028	14563	49	0.00336
GID7313031	14563	169	0.0116
GID7313048	14563	77	0.00529
GID7313392	14563	330	0.02266
GID7313462	14563	42	0.00288
GID7313724	14563	126	0.00865
GID7313804	14563	91	0.00625
GID7313806	14563	237	0.01627
GID7395694	14563	22	0.00151
GID7395822	14563	490	0.03365
GID7395899	14563	155	0.01064
GID7396039	14563	192	0.01318
GID7396104	14563	173	0.01188
GID7396133	14563	66	0.00453
GID7396143	14563	2298	0.1578
GID7396161	14563	80	0.00549
GID7396172	14563	119	0.00817
GID7396194	14563	112	0.00769
GID7396209	14563	298	0.02046
GID7396228	14563	171	0.01174
GID7396235	14563	437	0.03001
GID7396236	14563	115	0.0079
GID7396355	14563	137	0.00941
GID7396550	14563	431	0.0296
GID7396624	14563	1110	0.07622
GID7396638	14563	143	0.00982
GID7396639	14563	128	0.00879
GID7396710	14563	104	0.00714
GID7396745	14563	176	0.01209
GID7397016	14563	431	0.0296
GID7397073	14563	91	0.00625
GID7397372	14563	359	0.02465
GID7397501	14563	650	0.04463
GID7397687	14563	183	0.01257
GID7397691	14563	211	0.01449
GID7397728	14563	270	0.01854
GID7397747	14563	85	0.00584
GID7397754	14563	383	0.0263
GID7397815	14563	50	0.00343
GID7398014	14563	172	0.01181
GID7398212	14563	260	0.01785
GID7398217	14563	78	0.00536
GID7398235	14563	80	0.00549
GID7398245	14563	103	0.00707
GID7398376	14563	52	0.00357
GID7398701	14563	224	0.01538
GID7398846	14563	69	0.00474
GID7398872	14563	115	0.0079
GID7398920	14563	79	0.00542
GID7399013	14563	55	0.00378
GID7399014	14563	48	0.0033
GID7399072	14563	288	0.01978
GID7399179	14563	185	0.0127
GID7399180	14563	401	0.02754
GID7399267	14563	99	0.0068
GID7399277	14563	113	0.00776
GID7399345	14563	63	0.00433
GID7399399	14563	111	0.00762
GID7399413	14563	139	0.00954
GID7399442	14563	46	0.00316
GID7399445	14563	85	0.00584
GID7399457	14563	57	0.00391
GID7399473	14563	199	0.01366
GID7399485	14563	166	0.0114
GID7399497	14563	30	0.00206
GID7399537	14563	77	0.00529
GID7399541	14563	115	0.0079
GID7399548	14563	83	0.0057
GID7399578	14563	58	0.00398
GID7399601	14563	64	0.00439
GID7399609	14563	1142	0.07842
GID7399636	14563	26	0.00179
GID7399637	14563	34	0.00233
GID7399638	14563	34	0.00233
GID7399640	14563	41	0.00282
GID7399643	14563	25	0.00172
GID7399644	14563	44	0.00302
GID7399645	14563	26	0.00179
GID7399653	14563	2217	0.15224
GID7399712	14563	53	0.00364
GID7399819	14563	52	0.00357
GID7399829	14563	186	0.01277
GID7399832	14563	135	0.00927
GID7399875	14563	75	0.00515
GID7399946	14563	85	0.00584
GID7399966	14563	339	0.02328
GID7400073	14563	52	0.00357
GID7400091	14563	80	0.00549
GID7400281	14563	42	0.00288
GID7400293	14563	190	0.01305
GID7400308	14563	62	0.00426
GID7400311	14563	129	0.00886
GID7400313	14563	34	0.00233
GID7400318	14563	1796	0.12333
GID7400337	14563	28	0.00192
GID7400441	14563	252	0.0173
GID7400442	14563	65	0.00446
GID7400446	14563	811	0.05569
GID7400456	14563	93	0.00639
GID7400458	14563	52	0.00357
GID7400460	14563	51	0.0035
GID7400467	14563	65	0.00446
GID7400488	14563	47	0.00323
GID7400491	14563	121	0.00831
GID7400579	14563	61	0.00419
GID7400595	14563	59	0.00405
GID7400602	14563	129	0.00886
GID7400624	14563	60	0.00412
GID7400679	14563	256	0.01758
GID7400700	14563	51	0.0035
GID7400704	14563	263	0.01806
GID7400738	14563	111	0.00762
GID7400748	14563	32	0.0022
GID7400754	14563	49	0.00336
GID7400769	14563	61	0.00419
GID7400771	14563	137	0.00941
GID7400794	14563	55	0.00378
