# Supplementary material for: Elucidating SNP-based genetic diversity and population structure of advanced breeding lines of bread wheat (Triticum aestivum L.)
Source: PeerJ. 2021 Jun 22;9:e11593. doi: 10.7717/peerj.11593 (PMC8231316; doi:10.7717/peerj.11593)
Supplement: Supplemental Information 4 — Pop1 is subgroup1, pop2 is subgroup2, column D contains the names of private alleles in respective lines. [file peerj-09-11593-s004.xlsx]

## Sheet: PAL
Sample	Pop	No. Loci with Private Alleles	Loci with Private Alleles
GID7399640	Pop1	7	S1D_17855465 S1D_17969622 S2A_462381616 S3B_2280114 S5B_545278391 S5B_547145324 S7A_62883394
GID7396133	Pop1	8	S1A_567478043 S1B_380644010 S2B_69066105 S3A_45088175 S3D_552770985 S5B_588266110 S5D_219222771 S6A_88175358
GID7398920	Pop1	8	S3A_8862441 S3A_9210799 S3A_9212136 S3A_12479144 S3A_12926280 S3A_13035009 S3A_13267292 S7B_723442842
GID7396209	Pop1	11	S1B_380644010 S1D_6541259 S1D_6715588 S2A_709043341 S2A_710104121 S2A_710105140 S2A_739470870 S3D_552770985 S5B_588266110 S5D_219222771 S6A_88175358
GID7399497	Pop1	12	S1A_556109917 S1B_585888040 S2A_62208181 S2A_739470870 S5A_456895932 S5B_543542047 S5B_545278391 S5B_547145324 S5B_563550437 S5B_588266110 S5B_659029395 S5B_659226012
GID7398212	Pop1	16	S1A_41368108 S1A_49891048 S1A_535896241 S1A_535952223 S1A_535952287 S1B_289085903 S1B_290423403 S1B_595161068 S2B_190378167 S5A_699803948 S5A_699849390 S5B_588266110 S6A_42844958 S6A_579810544 S6A_580203517 S7A_22716113
GID7399712	Pop1	19	S1A_582654763 S1A_582763967 S1A_583167758 S1A_583171751 S1A_583287245 S1A_583529709 S1A_583715267 S1A_583895754 S1A_584083646 S1A_584084194 S1D_17855465 S1D_17969622 S2A_78238861 S3B_2280114 S3B_769597821 S3B_769597829 S3B_769731289 S3B_769809316 S6D_5594180
GID7399637	Pop1	20	S1A_582654763 S1A_582763967 S1A_583167758 S1A_583171751 S1A_583287245 S1A_583529709 S1A_583715267 S1A_583895754 S1A_584083646 S1A_584084194 S1D_17855465 S1D_17969622 S2A_78238861 S2A_462381616 S3B_769597821 S3B_769597829 S3B_769731289 S3B_769809316 S5B_547145324 S7A_62883394
GID7399638	Pop1	21	S1A_582654763 S1A_582763967 S1A_583167758 S1A_583171751 S1A_583287245 S1A_583529709 S1A_583715267 S1A_583895754 S1A_584083646 S1A_584084194 S1D_17855465 S1D_17969622 S2A_78238861 S2A_462381616 S3B_769597821 S3B_769597829 S3B_769731289 S3B_769809316 S5B_547145324 S6D_5594180 S7A_62883394
GID7399644	Pop1	22	S1A_582654763 S1A_582763967 S1A_583167758 S1A_583171751 S1A_583287245 S1A_583529709 S1A_583715267 S1A_583895754 S1A_584083646 S1A_584084194 S1D_17855465 S1D_17969622 S2A_78238861 S2A_462381616 S3B_769597821 S3B_769597829 S3B_769731289 S3B_769809316 S3D_258078733 S5B_547145324 S6D_5594180 S7A_62883394
GID7396172	Pop1	24	S1B_380644010 S1D_6541259 S1D_6715588 S2B_764917503 S3A_45088175 S3A_683519275 S3A_683572582 S3A_683982831 S3A_685289392 S3B_798344910 S3B_798685474 S3B_799714911 S3B_799721626 S3B_799723156 S3B_799744770 S3B_800129504 S3B_801131373 S3D_552770985 S5D_219222771 S6A_88175358 S6B_696019537 S7B_672789030 S7B_672910520 S7B_672989865
GID7399636	Pop1	25	S1A_582654763 S1A_582763967 S1A_583167758 S1A_583171751 S1A_583287245 S1A_583529709 S1A_583715267 S1A_583895754 S1A_584083646 S1A_584084194 S1D_17855465 S1D_17969622 S2A_78238861 S2A_462381616 S3A_8862441 S3A_9210799 S3A_9212136 S3B_769597821 S3B_769597829 S3B_769731289 S3B_769809316 S5B_545278391 S5B_547145324 S6D_5594180 S7A_62883394
GID7399643	Pop1	27	S1A_582654763 S1A_582763967 S1A_583167758 S1A_583171751 S1A_583287245 S1A_583529709 S1A_583715267 S1A_583895754 S1A_584083646 S1A_584084194 S1D_17855465 S1D_17969622 S2A_78238861 S2A_462381616 S3A_8862441 S3A_9210799 S3A_9212136 S3B_2280114 S3B_769597821 S3B_769597829 S3B_769731289 S3B_769809316 S3D_258078733 S5B_545278391 S5B_547145324 S6D_5594180 S7A_62883394
GID7396104	Pop1	29	S1A_1145442 S1A_1158042 S1A_41368108 S1A_46222311 S1A_46442544 S1A_47521369 S1A_47581359 S1A_48793364 S1A_48998793 S1A_49153543 S1A_49154769 S1A_49239494 S1A_49245431 S1A_49245501 S1A_49281757 S1B_380644010 S2A_739470870 S3B_798344910 S3B_798685474 S3B_799714911 S3B_799721626 S3B_799723156 S3B_799744770 S3B_800129504 S3B_801131373 S5D_219222771 S6A_42844958 S6A_88175358 S7D_21476636
GID7398872	Pop1	40	S4B_11905230 S4B_11905357 S4B_11986478 S5A_389166990 S5A_389726021 S5A_389726241 S5A_390232208 S5A_391900818 S5A_391988559 S5A_393257273 S5A_393918785 S5A_394141342 S5A_394179699 S5A_394752877 S5A_394754086 S5A_394948375 S5A_396230360 S5A_534944909 S5A_535010010 S5A_535141981 S5A_536220903 S5A_536221037 S5A_536436122 S5A_548387269 S5A_548387542 S5A_548413349 S5B_534013165 S5B_554113700 S7A_190785…
GID7400313	Pop1	72	S1B_448740348 S1B_451069955 S2A_462381616 S2B_69066105 S2B_116156694 S2B_608841041 S2B_616934964 S2B_617623462 S2B_617875991 S2B_617949721 S2B_617952910 S2B_617952912 S2B_620194469 S2B_620232294 S2B_620850351 S2B_621184651 S2B_638753235 S2B_638955036 S2B_639310242 S2B_639663776 S2B_642399842 S2B_642534505 S2B_643091644 S2B_643178831 S2B_643268530 S2B_644162838 S2B_644162841 S2B_645153757 S2B_6460…
GID7400308	Pop1	75	S1B_448740348 S2A_462381616 S2B_69066105 S2B_116156694 S2B_608841041 S2B_616934964 S2B_617623462 S2B_617875991 S2B_617949721 S2B_617952910 S2B_617952912 S2B_620194469 S2B_620232294 S2B_620850351 S2B_621184651 S2B_638753235 S2B_638955036 S2B_639310242 S2B_639663776 S2B_642399842 S2B_642534505 S2B_643091644 S2B_643178831 S2B_643268530 S2B_644162838 S2B_644162841 S2B_645153757 S2B_646064460 S2B_6469…
GID7399645	Pop1	92	S2A_78238861 S2A_462381616 S3B_2280114 S5B_148056220 S5B_148097420 S5B_149551898 S5B_150682936 S5B_152964335 S5B_157460062 S5B_158575503 S5B_158592647 S5B_159064442 S5B_159503563 S5B_159806783 S5B_160861743 S5B_162343291 S5B_162775705 S5B_163119888 S5B_163742941 S5B_168578292 S5B_170303584 S5B_171928398 S5B_174628648 S5B_177577911 S5B_179478677 S5B_179525314 S5B_179974019 S5B_180602355 S5B_182990…
GID7400311	Pop1	94	S1A_582654763 S1A_582763967 S1A_583167758 S1A_583171751 S1A_583287245 S1A_583529709 S1A_583715267 S1A_583895754 S1A_584083646 S1A_584084194 S1B_448740348 S1B_451069955 S1B_631967546 S1B_673948840 S2B_69066105 S2B_116156694 S2B_608841041 S2B_616934964 S2B_617623462 S2B_617875991 S2B_617949721 S2B_617952910 S2B_617952912 S2B_620194469 S2B_620232294 S2B_620850351 S2B_621184651 S2B_638753235 S2B_6389…
GID7398217	Pop1	105	S2A_739470870 S2B_188722319 S2B_190378167 S2B_634694079 S2B_634694109 S2B_638955036 S3A_8862441 S3A_9210799 S3A_9212136 S3A_12479144 S3A_12926280 S3A_13035009 S3A_13267292 S5B_148056220 S5B_148097420 S5B_149551898 S5B_150682936 S5B_152964335 S5B_157460062 S5B_158575503 S5B_158592647 S5B_159064442 S5B_159503563 S5B_159806783 S5B_160861743 S5B_162343291 S5B_162775705 S5B_163119888 S5B_163742941 S5B…
GID7400488	Pop1	145	S1A_582654763 S1A_582763967 S1A_583167758 S1A_583171751 S1A_583287245 S1A_583529709 S1A_583715267 S1A_583895754 S1A_584083646 S1A_584084194 S1B_451069955 S1B_673948840 S1D_6541259 S1D_6715588 S2A_52273147 S2A_62208181 S2B_608841041 S3A_8862441 S3A_9210799 S3A_9212136 S3B_29976536 S3B_41015976 S3B_769597821 S3B_769597829 S3B_769731289 S3B_769809316 S4B_4791631 S4B_4852104 S4B_4852517 S4B_4893006 S…
GID7400491	Pop1	149	S1A_582654763 S1A_582763967 S1A_583167758 S1A_583171751 S1A_583287245 S1A_583529709 S1A_583715267 S1A_583895754 S1A_584083646 S1A_584084194 S1B_451069955 S1B_673948840 S1D_6541259 S1D_6715588 S2A_52273147 S2A_62208181 S2B_608841041 S3A_8862441 S3A_9210799 S3A_9212136 S3B_29976536 S3B_41015976 S3B_670127593 S3B_769597821 S3B_769597829 S3B_769731289 S3B_769809316 S3D_258078733 S4B_4791631 S4B_48521…
GID7396143	Pop2	3	S1B_380644010 S2A_739470870 S5D_219222771
GID7396355	Pop2	5	S1B_585888040 S4D_265826407 S5A_221019452 S5A_347893268 S7B_723442842
GID7397747	Pop2	6	S3D_258078733 S5A_221019452 S5A_347893268 S5A_367753934 S6B_374283219 S7A_24768984
GID7396624	Pop2	8	S7A_24768984 S7D_145102099 S7D_170517812 S7D_173450041 S7D_178210753 S7D_179915720 S7D_293549376 S7D_294035825
GID7397016	Pop2	8	S1A_567478043 S3D_171037325 S5A_699803948 S5A_699849390 S5B_534013165 S5B_537837899 S7D_71569531 S7D_71628885
GID7396745	Pop2	9	S1A_1145442 S1A_1158042 S1A_4159194 S1A_4363168 S3B_2280114 S6B_62250561 S6B_62250574 S7A_71631637 S7D_524397143
GID7399578	Pop2	9	S1A_11207721 S1A_11530713 S1A_13829899 S1A_13844180 S1A_20697903 S1A_20886731 S7B_672789030 S7B_672910520 S7B_672989865
GID7396550	Pop2	10	S1A_9600655 S2A_52273147 S2A_62208181 S3B_764807612 S4A_641881352 S4A_643152282 S5A_524074038 S5B_542234484 S7D_71569531 S7D_71628885
GID7395822	Pop2	11	S1A_9600655 S1A_11207721 S1A_11530713 S1A_567478043 S1A_568496490 S1A_568650751 S1A_568721487 S1A_568938225 S1A_570226695 S1A_570227644 S1A_574479469
GID7399013	Pop2	14	S2A_62208181 S2B_785548200 S2B_785905982 S3B_10237265 S3B_764076657 S3B_764807612 S4A_641881352 S4A_643152282 S5A_221019452 S5A_559517035 S5A_559745278 S5A_559748605 S5A_560470327 S7B_723442842
GID7399548	Pop2	14	S1A_556109917 S3A_8862441 S3A_9210799 S3A_9212136 S3A_12479144 S3A_12926280 S3A_13035009 S3A_13267292 S4D_265826407 S5B_542234484 S5B_588266110 S6D_472579767 S6D_473049509 S6D_473287249
GID7399457	Pop2	17	S5A_13096895 S5B_429885990 S5B_429897239 S5B_430290844 S5B_430291029 S5B_542234484 S5B_563463598 S5B_563463781 S5B_563544851 S5B_563547266 S5B_563550437 S5B_563716653 S5B_563878522 S5B_565011024 S5B_565413439 S5B_565413483 S5B_565504007
GID7399946	Pop2	17	S3A_45088175 S3A_694949963 S3A_694969373 S3B_29976536 S3B_764076657 S3B_764807612 S3D_171037325 S4B_657290599 S5A_13096895 S5B_644459319 S6B_308239988 S6B_696019537 S6B_696182978 S6B_696194039 S6B_696195599 S6B_696237388 S7B_723442842
GID7400337	Pop2	18	S1A_556109917 S2B_69066105 S3A_8862441 S3A_9210799 S3A_9212136 S3B_10237265 S4A_641881352 S4A_643152282 S5A_13096895 S5B_534013165 S5B_537837899 S6B_35249490 S6B_62250561 S6D_472096444 S7A_15198988 S7A_24768984 S7A_521839872 S7B_723442842
GID7400446	Pop2	18	S1D_6541259 S1D_6715588 S2A_353644599 S2B_748575012 S2B_748595371 S2B_760302061 S3B_2280114 S3B_17070387 S5A_13096895 S7D_19732329 S7D_21476636 S7D_524397143 S7D_528346760 S7D_529044228 S7D_529349312 S7D_559884939 S7D_560000107 S7D_560501470
GID7397815	Pop2	19	S1A_534272127 S1A_535896241 S1A_535952223 S1A_535952287 S2A_52273147 S2A_62208181 S5A_367753934 S5D_545942866 S6B_35249490 S6B_35265705 S6B_35514700 S6B_35627502 S7A_49307443 S7A_49410085 S7A_49905601 S7A_50199144 S7A_50306786 S7A_50396096 S7A_521839872
GID7399537	Pop2	19	S1D_6541259 S1D_6715588 S2A_709043341 S3B_2280114 S3B_579163161 S3B_581338418 S3D_258078733 S4D_506496395 S4D_509798252 S5B_534013165 S5B_537837899 S5D_550640539 S7A_19958948 S7A_20287559 S7A_20436666 S7A_20965014 S7A_21178968 S7A_21799004 S7A_22716113
GID7397687	Pop2	22	S1A_3218479 S1A_9600655 S1A_11207721 S1A_11530713 S1A_20697903 S1A_20886731 S1B_673948840 S2A_62208181 S2B_69066105 S2B_116156694 S4D_265826407 S5A_347893268 S5D_545942866 S5D_546455220 S5D_547236773 S5D_547603543 S5D_550640539 S6A_79086536 S6B_35249490 S6B_35265705 S6B_35514700 S6B_35627502
GID7399966	Pop2	22	S1A_4159194 S1A_4363168 S1A_556109917 S1B_585888040 S2A_353644599 S2A_709043341 S2A_710104121 S2A_710105140 S3A_45088175 S3B_670127593 S5A_548387269 S5A_548387542 S5A_548413349 S5A_548507713 S5A_559517035 S5A_559745278 S5A_559748605 S5A_560470327 S5A_580935013 S5A_666705231 S5A_666724199 S6A_88175358
GID7399345	Pop2	24	S1A_20697903 S1A_20886731 S1A_41368108 S1A_49891048 S1A_535896241 S1A_535952223 S1A_535952287 S2A_62208181 S3B_2280114 S3B_136733802 S4A_643152282 S5A_699803948 S5A_699849390 S5D_545942866 S6A_42844958 S6A_579810544 S6A_580203517 S6B_707307713 S6B_713484108 S6B_717114490 S6B_717539086 S6B_718377798 S6B_719901800 S7A_71631637
GID7400091	Pop2	24	S1A_20697903 S1A_20886731 S1A_41368108 S1A_49891048 S1B_289085903 S1B_290423403 S2A_52273147 S2A_62208181 S2B_69066105 S2B_764917503 S4A_641881352 S4A_643152282 S5B_429885990 S5B_429897239 S5B_430290844 S5B_430291029 S5B_543542047 S5B_545278391 S5B_547145324 S6A_42844958 S6A_579810544 S6A_580203517 S7D_71569531 S7D_71628885
GID7396161	Pop2	25	S1B_380644010 S2B_616934964 S2B_617623462 S2B_617875991 S2B_617949721 S2B_617952910 S2B_617952912 S2B_620194469 S2B_620232294 S2B_620850351 S2B_621184651 S2B_638753235 S2B_638955036 S2B_639310242 S2B_639663776 S2B_642399842 S2B_642534505 S2B_643091644 S2B_643178831 S2B_643268530 S2B_644162838 S2B_644162841 S4A_641881352 S4A_643152282 S5D_219222771
GID7399601	Pop2	25	S2B_608841041 S2B_616934964 S2B_617623462 S2B_617875991 S2B_617949721 S2B_617952910 S2B_617952912 S2B_620194469 S2B_620232294 S2B_620850351 S2B_621184651 S2B_638753235 S2B_638955036 S2B_639310242 S2B_639663776 S2B_642534505 S2B_643091644 S2B_643178831 S2B_643268530 S2B_644162838 S2B_644162841 S2B_645153757 S2B_646064460 S2B_646960588 S7B_723442842
GID7395899	Pop2	26	S1A_20697903 S1A_20886731 S1A_41368108 S1A_535896241 S1A_535952223 S1A_535952287 S1A_556109917 S2A_709043341 S2A_710104121 S2A_710105140 S3A_45088175 S3A_683519275 S3A_683572582 S3A_683982831 S3A_685289392 S3A_685348120 S5B_429885990 S5B_429897239 S5B_430290844 S5B_430291029 S5D_545942866 S6B_696019537 S6B_696182978 S6B_696194039 S6B_696195599 S6B_696237388
GID7398376	Pop2	26	S1A_579225352 S1A_579407706 S1B_431859097 S1B_431859122 S1B_432803491 S1B_523776528 S1B_524066092 S1B_524095925 S1B_525655065 S1B_526251320 S1B_526271823 S1B_526277059 S1B_526570325 S3B_77322124 S3B_136733802 S3D_552770985 S5A_559517035 S5A_559745278 S5A_559748605 S5A_560470327 S5A_567546777 S6B_696019537 S7D_524397143 S7D_559884939 S7D_560000107 S7D_560501470
GID7396710	Pop2	28	S1D_18994718 S3B_77322124 S4B_4791631 S4B_4852104 S4B_4852517 S4B_4893006 S5A_559517035 S5A_559745278 S5A_559748605 S5A_560470327 S5A_567546777 S5B_534013165 S5B_537837899 S5B_563463598 S5B_563463781 S5B_563544851 S5B_563547266 S5B_563550437 S5B_563716653 S5B_563878522 S5B_565011024 S5B_565413439 S5B_565413483 S5B_565504007 S7A_15198988 S7A_32179154 S7B_723442842 S7D_524397143
GID7400442	Pop2	30	S1A_556109917 S1B_631967546 S2B_748575012 S2B_748595371 S2B_760302061 S3A_45088175 S3B_2280114 S3B_17070387 S5A_456895932 S5A_548387269 S5A_548387542 S5A_548413349 S5A_548507713 S6B_308239988 S6B_696019537 S6B_696182978 S6B_696194039 S6B_696195599 S6B_696237388 S6D_472096444 S7A_71631637 S7D_19732329 S7D_21476636 S7D_524397143 S7D_528346760 S7D_529044228 S7D_529349312 S7D_559884939 S7D_560000107 …
GID7400700	Pop2	30	S1A_1145442 S1A_1158042 S1B_585888040 S2B_748575012 S2B_748595371 S3A_8862441 S3A_9210799 S3A_9212136 S3B_579163161 S3B_581338402 S3B_581338418 S3B_584743953 S3B_724615114 S3D_171037325 S5B_659029395 S5B_659226012 S6A_563127043 S6A_571543458 S6A_571845223 S6A_572015871 S6B_674558588 S6B_681076780 S6B_681230101 S6B_681381402 S6B_681904309 S6B_707307713 S6B_713484108 S6B_719901800 S6B_720804608 S7A…
GID7399442	Pop2	33	S1A_41368108 S1A_567478043 S1A_568496490 S1A_568650751 S1A_568721487 S1A_568938225 S1A_570226695 S1A_570227644 S1A_574479469 S1A_579225352 S1A_579407706 S2A_78238861 S5A_524074038 S5D_546455220 S5D_547236773 S5D_547603543 S6A_42844958 S6A_579810544 S6A_580203517 S7A_19078501 S7A_19711815 S7A_19716801 S7A_19958948 S7A_19968389 S7A_20287559 S7A_20436666 S7A_20965014 S7A_21178968 S7A_21799004 S7A_22…
GID7313462	Pop2	34	S2B_764917503 S2B_765035098 S3A_45088175 S3A_683519275 S3A_683572582 S3A_683982831 S3A_685289392 S3A_685348120 S3A_694949963 S3A_694969373 S3B_77322124 S3B_764076657 S3B_764807612 S3B_798344910 S3B_798685474 S3B_799714911 S3B_799721626 S3B_799723156 S3B_799744770 S3B_800129504 S3B_801131373 S3D_171037325 S4B_657290599 S5A_699803948 S5A_699849390 S5B_644459319 S6A_579810544 S6A_580203517 S6B_69601…
GID7398846	Pop2	34	S1A_1158042 S1A_1158055 S1A_1238021 S1A_1238114 S1A_1698908 S1A_1846791 S1A_2185113 S1A_3218479 S1A_3452684 S1A_4159194 S1A_4206845 S1A_4363168 S1A_6424350 S1A_6632531 S1A_7315187 S1A_7658855 S1A_20697903 S1A_20886731 S1B_673948840 S3A_694949963 S3A_694969373 S3B_77322124 S3B_136733802 S3B_764076657 S3B_764807612 S5A_221019452 S5D_545942866 S6B_35249490 S6B_35265705 S6B_35514700 S6B_35627502 S7A_…
GID7399072	Pop2	34	S1A_1158042 S1A_1158055 S1A_1238021 S1A_1238114 S1A_1698908 S1A_1846791 S1A_2185113 S1A_3218479 S1A_3452684 S1A_4159194 S1A_4206845 S1A_4363168 S1A_6394480 S1A_6424350 S1A_6632531 S1A_7281143 S1A_7285648 S1A_7315187 S1A_7658855 S1A_8118239 S1A_8152172 S1A_8633935 S1A_8668416 S1A_9236507 S1A_534272127 S1A_535896241 S1A_535952223 S1A_535952287 S1B_631967546 S3D_258078733 S6A_563127043 S6A_571543458…
GID7396235	Pop2	36	S1A_1145442 S1A_1158042 S1A_4159194 S1A_20697903 S1A_20886731 S1A_567478043 S1B_380644010 S1B_594766027 S1B_594965501 S1B_595161068 S2B_760302061 S2B_764917503 S2B_784307811 S2B_785548200 S2B_785905982 S3A_533994803 S3B_17070387 S3B_77322124 S3D_609171668 S4A_641881352 S4A_643152282 S4B_657290599 S5A_548387269 S5A_548387542 S5A_548413349 S5A_548507713 S5D_219222771 S6A_42844958 S6B_707307713 S6B_…
GID7399819	Pop2	37	S1A_579225352 S1A_579407706 S1D_17855465 S1D_17969622 S2A_78238861 S2A_462381616 S2A_739470870 S2B_784307811 S3A_45088175 S5A_666705231 S5A_666724199 S5D_546455220 S5D_547236773 S5D_547603543 S6B_62250561 S6B_62250574 S6B_374283219 S6D_472096444 S6D_472579767 S6D_473049509 S6D_473287249 S7A_19078501 S7A_19711815 S7A_19716801 S7A_19958948 S7A_19968389 S7A_20287559 S7A_20436666 S7A_20965014 S7A_211…
GID7397754	Pop2	39	S1A_1158042 S1A_1158055 S1A_1238021 S1A_1238114 S1A_1698908 S1A_1846791 S1A_2185113 S1A_6394480 S1A_6424350 S1A_6632531 S1A_7281143 S1A_7285648 S1A_7315187 S1A_7658855 S1A_8118239 S1A_8152172 S1A_8633935 S1A_8668416 S1A_9236507 S1A_9600655 S1A_11207721 S1A_11530713 S1A_13829899 S1A_13844180 S1B_620015835 S1B_673948840 S4B_4791631 S4B_4852104 S4B_4852517 S4B_4893006 S4D_265826407 S4D_506496395 S4D…
GID7313804	Pop2	41	S1A_556109917 S2A_353644599 S2A_462381616 S2B_616934964 S2B_617623462 S2B_617875991 S2B_617949721 S2B_617952910 S2B_617952912 S2B_620194469 S2B_620232294 S2B_620850351 S2B_621184651 S2B_638753235 S2B_638955036 S2B_639310242 S2B_639663776 S2B_642399842 S2B_642534505 S2B_643091644 S2B_643178831 S2B_643268530 S2B_644162838 S2B_644162841 S4A_643152282 S5A_221019452 S5A_524074038 S5B_543542047 S5B_545…
GID7397073	Pop2	43	S1B_334104014 S1B_343113152 S1B_347032327 S1B_372679251 S1B_378010698 S1B_381650384 S1B_400959034 S1B_431859122 S1D_6541259 S1D_6715588 S2A_709043341 S2A_710104121 S3B_720856499 S3B_720989723 S3B_721031363 S3B_721046452 S3B_764807612 S3B_769597821 S3B_769597829 S3B_769731289 S3B_769809316 S3D_171037325 S3D_258078733 S4D_265826407 S4D_506496395 S4D_509798252 S5A_559517035 S5A_559745278 S5A_5597486…
GID7400602	Pop2	43	S1A_556109917 S1A_567478043 S1A_579225352 S1A_579407706 S1B_594766027 S1B_594965501 S1B_595161068 S1D_18994718 S2A_62208181 S5A_221019452 S5A_367753934 S5A_456895932 S5B_554113700 S6A_42844958 S6A_78481163 S6A_78843166 S6A_79086536 S6A_79088318 S6A_79357920 S6A_81645295 S6A_83183067 S6A_563127043 S6A_571543458 S6A_571845223 S6A_572015871 S7A_19078501 S7A_19711815 S7A_19716801 S7A_19958948 S7A_199…
GID7399014	Pop2	44	S1D_41868257 S1D_41915207 S1D_42037079 S1D_42141847 S1D_42277512 S1D_42484009 S1D_42486030 S1D_42767586 S1D_42977190 S1D_43145298 S1D_43181363 S1D_43279407 S1D_43279601 S1D_43689250 S1D_45484751 S1D_46097921 S1D_46172319 S1D_46223659 S1D_46324848 S1D_46337185 S1D_46392867 S1D_46475610 S1D_46487145 S1D_47414024 S1D_48731140 S1D_48736530 S1D_57027944 S1D_57229454 S1D_57506439 S1D_58124106 S1D_58405…
GID7400748	Pop2	44	S1A_1145442 S1A_1158042 S1A_4159194 S1B_620015835 S1D_17855465 S1D_17969622 S2A_62208181 S2A_709043341 S2A_710104121 S2A_710105140 S3A_694949963 S3A_694969373 S3B_136733802 S3B_579163161 S3B_720856499 S3B_720989723 S3B_721031363 S3B_721046452 S3B_764076657 S3B_764807612 S5A_699803948 S5A_699849390 S5B_122479801 S5B_542234484 S5B_563463598 S5B_563463781 S5B_563544851 S5B_563547266 S5B_563550437 S5…
GID7400441	Pop2	45	S1A_556109917 S1B_631967546 S2B_748575012 S2B_748595371 S2B_760302061 S3A_45088175 S3B_2280114 S3B_17070387 S3D_552770985 S5A_456895932 S5A_548387269 S5A_548387542 S5A_548413349 S5A_548507713 S5B_148056220 S5B_148097420 S5B_149551898 S5B_150682936 S5B_152964335 S5B_157460062 S5B_158575503 S5B_158592647 S5B_159064442 S5B_159503563 S5B_159806783 S5B_160861743 S5B_163742941 S5D_545942866 S6B_3082399…
GID7396236	Pop2	46	S1A_1145442 S1A_1158042 S1A_4159194 S1B_380644010 S1B_620015835 S2B_760302061 S2B_764917503 S2B_784307811 S2B_785548200 S2B_785905982 S3A_45088175 S3A_533994803 S3B_798344910 S3B_798685474 S3B_799714911 S3B_799721626 S3B_799723156 S3B_799744770 S3B_800129504 S3B_801131373 S4B_657290599 S5A_548387269 S5A_548387542 S5A_548413349 S5A_548507713 S5A_559517035 S5A_559745278 S5A_559748605 S5A_560470327 …
GID7397728	Pop2	48	S1B_620015835 S1D_41868257 S1D_41915207 S1D_42037079 S1D_42141847 S1D_42277512 S1D_42484009 S1D_42486030 S1D_42767586 S1D_42977190 S1D_43145298 S1D_43181363 S1D_43279407 S1D_43279601 S1D_43689250 S1D_45484751 S1D_46097921 S1D_46172319 S1D_46223659 S1D_46324848 S1D_46337185 S1D_46392867 S1D_46475610 S1D_46487145 S1D_47414024 S1D_48731140 S1D_48736530 S1D_57027944 S1D_57229454 S1D_57506439 S1D_5812…
GID7400579	Pop2	51	S1A_13829899 S1A_13844180 S2A_52273147 S2A_62208181 S3A_12479144 S3A_12926280 S3A_13035009 S3A_13267292 S3A_533994803 S3B_2280114 S3B_10237265 S3B_17070387 S3B_77322124 S3B_136733802 S3B_581338402 S3B_581338418 S3B_584743953 S3B_670127593 S3B_720856499 S3B_720989723 S3B_721031363 S3B_721046452 S3B_764807612 S3B_769597821 S3B_769597829 S3B_769731289 S3B_769809316 S5A_221019452 S5A_699849390 S5B_65…
GID7313806	Pop2	52	S1A_556109917 S2A_353644599 S2A_462381616 S2B_616934964 S2B_617623462 S2B_617875991 S2B_617949721 S2B_617952910 S2B_617952912 S2B_620194469 S2B_620232294 S2B_620850351 S2B_621184651 S2B_638753235 S2B_638955036 S2B_639310242 S2B_639663776 S2B_642399842 S2B_642534505 S2B_643091644 S2B_643178831 S2B_643268530 S2B_644162838 S2B_644162841 S2B_760302061 S4D_265826407 S5A_666705231 S5A_666724199 S5D_546…
GID7400456	Pop2	57	S1A_582654763 S1A_582763967 S1A_583167758 S1A_583171751 S1A_583287245 S1A_583529709 S1A_583715267 S1A_583895754 S1A_584083646 S1A_584084194 S1B_451069955 S1B_673948840 S2B_760302061 S3A_8862441 S3A_9210799 S3A_9212136 S3B_769597821 S3B_769597829 S3B_769731289 S3B_769809316 S3D_258078733 S4B_11905230 S4B_11905357 S4B_11986478 S5A_367753934 S5A_389166990 S5A_389726021 S5A_389726241 S5A_390232208 S5…
GID7400467	Pop2	59	S1A_582654763 S1A_582763967 S1A_583167758 S1A_583171751 S1A_583287245 S1A_583529709 S1A_583715267 S1A_583895754 S1A_584083646 S1A_584084194 S1B_451069955 S1B_673948840 S2A_709043341 S2A_710104121 S2A_710105140 S2B_760302061 S3A_8862441 S3A_9210799 S3A_9212136 S3B_769597821 S3B_769597829 S3B_769731289 S3B_769809316 S4B_11905230 S4B_11905357 S4B_11986478 S5A_367753934 S5A_389166990 S5A_389726021 S5…
GID7400458	Pop2	60	S1A_582654763 S1A_582763967 S1A_583167758 S1A_583171751 S1A_583287245 S1A_583529709 S1A_583715267 S1A_583895754 S1A_584083646 S1A_584084194 S1B_451069955 S1B_673948840 S2A_709043341 S2A_710104121 S2A_710105140 S2B_760302061 S3A_8862441 S3A_9210799 S3A_9212136 S3B_769597821 S3B_769597829 S3B_769731289 S3B_769809316 S3D_258078733 S4B_11905230 S4B_11905357 S4B_11986478 S5A_367753934 S5A_389166990 S5…
GID7400754	Pop2	66	S1B_334104014 S1B_343113152 S1B_347032327 S1B_393269427 S1B_399401941 S1B_400959034 S1B_523776528 S1B_524066092 S1B_524095925 S1B_525655065 S1B_526277059 S1B_526570325 S1B_558215458 S1D_17969622 S2A_62208181 S3B_77322124 S3B_136733802 S3B_581338402 S3B_581338418 S3B_584743953 S3B_670127593 S3B_720856499 S3B_720989723 S3B_721031363 S3B_721046452 S3B_764807612 S3B_769597821 S3B_769597829 S3B_769731…
GID7400460	Pop2	68	S1A_582654763 S1A_582763967 S1A_583167758 S1A_583171751 S1A_583287245 S1A_583529709 S1A_583715267 S1A_583895754 S1A_584083646 S1A_584084194 S1B_451069955 S1B_673948840 S2A_709043341 S2A_710104121 S2A_710105140 S2B_760302061 S3A_8862441 S3A_9210799 S3A_9212136 S3B_769597821 S3B_769597829 S3B_769731289 S3B_769809316 S3D_258078733 S4B_11905230 S4B_11905357 S4B_11986478 S5A_367753934 S5A_389166990 S5…
GID7399413	Pop2	76	S1A_1145442 S1A_1158042 S1A_3218479 S1A_4159194 S1A_534272127 S1A_535896241 S1A_535952223 S1A_535952287 S1B_523776528 S1B_524066092 S1B_524095925 S1B_525655065 S1B_526251320 S1B_526271823 S1B_526277059 S1B_526570325 S1B_558215458 S1B_594766027 S1B_594965501 S1B_595161068 S1D_6541259 S1D_6715588 S3B_764076657 S3B_764807612 S3D_552770985 S5A_559517035 S5A_559745278 S5A_559748605 S5A_560470327 S5A_5…
GID7399875	Pop2	76	S1A_567478043 S1A_568496490 S1A_568650751 S1A_568721487 S1A_568938225 S1A_570226695 S1A_570227644 S1A_574479469 S1D_41868257 S1D_41915207 S1D_42037079 S1D_42141847 S1D_42277512 S1D_42484009 S1D_42486030 S1D_42767586 S1D_42977190 S1D_43145298 S1D_43181363 S1D_43279407 S1D_43279601 S1D_43689250 S1D_45484751 S1D_46097921 S1D_46172319 S1D_46223659 S1D_46324848 S1D_46337185 S1D_46392867 S1D_46475610 S…
GID7396228	Pop2	79	S1A_1145442 S1A_1158042 S1A_20697903 S1A_20886731 S1B_380644010 S1B_620015835 S1D_41868257 S1D_41915207 S1D_42037079 S1D_42141847 S1D_42277512 S1D_42484009 S1D_42486030 S1D_42767586 S1D_42977190 S1D_43145298 S1D_43181363 S1D_43279407 S1D_43279601 S1D_43689250 S1D_45484751 S1D_46097921 S1D_46172319 S1D_46223659 S1D_46324848 S1D_46337185 S1D_46392867 S1D_46475610 S1D_46487145 S1D_47414024 S1D_48731…
GID7399609	Pop2	85	S1A_1158042 S1A_1158055 S1A_1238021 S1A_1238114 S1A_1698908 S1A_1846791 S1A_2185113 S1A_3218479 S1A_3452684 S1A_4206845 S1A_4363168 S1A_6394480 S1A_6424350 S1A_6632531 S1A_7281143 S1A_7285648 S1A_7315187 S1A_7658855 S1A_8118239 S1A_8152172 S1A_8633935 S1A_8668416 S1A_9236507 S1A_534272127 S1B_523776528 S1B_524066092 S1B_524095925 S1B_525655065 S1B_526251320 S1B_526271823 S1B_526277059 S1B_5265703…
GID7396039	Pop2	90	S1A_567478043 S1A_568496490 S1A_568650751 S1A_568721487 S1A_568938225 S1A_570226695 S1A_570227644 S1A_574479469 S3D_609171668 S5B_148056220 S5B_148097420 S5B_149551898 S5B_150682936 S5B_152964335 S5B_157460062 S5B_158575503 S5B_158592647 S5B_159064442 S5B_159503563 S5B_159806783 S5B_160861743 S5B_162343291 S5B_162775705 S5B_163119888 S5B_163742941 S5B_168578292 S5B_170303584 S5B_171928398 S5B_174…
GID7399277	Pop2	91	S1A_567478043 S1A_568496490 S1A_568650751 S1A_568721487 S1A_568938225 S1A_570226695 S1A_570227644 S1B_448740348 S1B_451069955 S1B_620015835 S1D_41868257 S1D_41915207 S1D_42037079 S1D_42141847 S1D_42277512 S1D_42484009 S1D_42486030 S1D_42767586 S1D_42977190 S1D_43145298 S1D_43181363 S1D_43279407 S1D_43279601 S1D_43689250 S1D_45484751 S1D_46097921 S1D_46172319 S1D_46223659 S1D_46324848 S1D_46337185…
GID7398014	Pop2	93	S3A_694949963 S3A_694969373 S3B_764076657 S3B_764807612 S3D_171037325 S4B_657290599 S5B_148056220 S5B_148097420 S5B_149551898 S5B_150682936 S5B_152964335 S5B_157460062 S5B_158575503 S5B_158592647 S5B_159064442 S5B_159503563 S5B_159806783 S5B_160861743 S5B_162343291 S5B_162775705 S5B_163119888 S5B_163742941 S5B_168578292 S5B_170303584 S5B_171928398 S5B_174628648 S5B_177577911 S5B_179478677 S5B_179…
GID7398245	Pop2	95	S1A_20697903 S1A_20886731 S1B_289085903 S1B_290423403 S1B_299942219 S1B_302036963 S1B_302037041 S1B_302981781 S1B_302981813 S1B_307428944 S1B_307481070 S1B_310691421 S1B_312919008 S1B_314328647 S1B_315386682 S1B_328818709 S1B_328983650 S1B_334104014 S1B_343113152 S1B_369378931 S1B_370034331 S1B_371139155 S1B_372679251 S1B_372717361 S1B_373495843 S1B_376550760 S1B_377285658 S1B_377911155 S1B_37791…
GID7399180	Pop2	96	S1A_1158042 S1A_1158055 S1A_1238021 S1A_1238114 S1A_1698908 S1A_1846791 S1A_2185113 S1A_3218479 S1A_3452684 S1A_4206845 S1A_4363168 S1A_6394480 S1A_6424350 S1A_6632531 S1A_7281143 S1A_7285648 S1A_7315187 S1A_7658855 S1A_8118239 S1A_8152172 S1A_8633935 S1A_8668416 S1A_9236507 S1A_49245431 S1A_49891048 S1A_567478043 S1B_343113152 S1B_347032327 S1B_431859097 S1B_431859122 S1B_523776528 S1B_524066092…
GID7399179	Pop2	98	S1A_1158042 S1A_1158055 S1A_1238021 S1A_1238114 S1A_1698908 S1A_1846791 S1A_2185113 S1A_3218479 S1A_3452684 S1A_4206845 S1A_4363168 S1A_6394480 S1A_6424350 S1A_6632531 S1A_7281143 S1A_7285648 S1A_7315187 S1A_7658855 S1A_8118239 S1A_8152172 S1A_8633935 S1A_8668416 S1A_9236507 S1A_49245431 S1A_49891048 S1A_567478043 S1B_343113152 S1B_431859097 S1B_431859122 S1B_523776528 S1B_524066092 S1B_525655065…
GID7396194	Pop2	102	S1B_380644010 S1B_448740348 S1B_451069955 S1B_585888040 S2B_188722319 S2B_190378167 S2B_638955036 S2B_748575012 S2B_748595371 S2B_764917503 S2B_765035098 S3D_552770985 S5A_221019452 S5A_534944909 S5A_535010010 S5A_535141981 S5A_536220903 S5A_536221037 S5A_536436122 S5B_122479801 S5B_148056220 S5B_148097420 S5B_149551898 S5B_150682936 S5B_152964335 S5B_157460062 S5B_158575503 S5B_158592647 S5B_159…
GID7398235	Pop2	103	S1A_9600655 S1A_11207721 S1A_20697903 S1A_20886731 S1A_41368108 S1A_46222311 S1A_46442544 S1A_47521369 S1A_47581359 S1A_48793364 S1A_48998793 S1A_49153543 S1A_49154769 S1A_49239494 S1A_49245431 S1A_49245501 S1A_49281757 S2A_739470870 S2B_188722319 S2B_190378167 S2B_634694079 S2B_634694109 S2B_638955036 S4B_657290599 S5A_51793323 S5A_52276139 S5A_52281948 S5A_52357876 S5A_52549357 S5A_52738371 S5A…
GID7399541	Pop2	105	S1A_1158042 S1A_1158055 S1A_1238021 S1A_1238114 S1A_1698908 S1A_1846791 S1A_2185113 S1A_3218479 S1A_3452684 S1A_4206845 S1A_4363168 S1A_6394480 S1A_6424350 S1A_6632531 S1A_7281143 S1A_7285648 S1A_7315187 S1A_7658855 S1A_8118239 S1A_8152172 S1A_8633935 S1A_8668416 S1A_9236507 S1A_534272127 S1A_535896241 S1A_535952223 S1A_535952287 S1A_556109917 S1A_582654763 S1A_582763967 S1A_583171751 S1A_5832872…
GID7399473	Pop2	106	S3A_12479144 S3A_12926280 S3A_13035009 S3A_13267292 S4A_643152282 S5B_122479801 S5B_148056220 S5B_148097420 S5B_149551898 S5B_150682936 S5B_152964335 S5B_157460062 S5B_158575503 S5B_158592647 S5B_159064442 S5B_159503563 S5B_159806783 S5B_160861743 S5B_162343291 S5B_162775705 S5B_163119888 S5B_163742941 S5B_168578292 S5B_170303584 S5B_171928398 S5B_174628648 S5B_177577911 S5B_179478677 S5B_1795253…
GID7399267	Pop2	107	S1A_41368108 S1A_46222311 S1A_46442544 S1A_47521369 S1A_47581359 S1A_48793364 S1A_48998793 S1A_49153543 S1A_49154769 S1A_49239494 S1A_49245431 S1A_49245501 S1A_49281757 S1B_620015835 S4A_641881352 S4A_643152282 S4B_657290599 S5A_51793323 S5A_52276139 S5A_52281948 S5A_52357876 S5A_52549357 S5A_52738371 S5A_53143218 S5A_53308898 S5A_53360127 S5A_54347487 S5A_55342030 S5A_57037297 S5A_57037953 S5A_5…
GID7400624	Pop2	107	S1A_1145442 S1A_1158042 S1A_9600655 S1A_11207721 S1A_11530713 S1A_13829899 S1A_41368108 S1A_46222311 S1A_46442544 S1A_47521369 S1A_47581359 S1A_49891048 S1A_582654763 S1A_582763967 S1A_583167758 S1A_583171751 S1A_583287245 S1A_583529709 S1A_583715267 S1A_583895754 S1A_584083646 S1A_584084194 S1B_585888040 S1D_18994718 S2A_62208181 S2A_353644599 S2B_188722319 S2B_190378167 S2B_634694079 S2B_634694…
GID7399445	Pop2	110	S1A_9600655 S1A_11207721 S1A_11530713 S1A_20697903 S1A_20886731 S1A_41368108 S1A_46222311 S1A_46442544 S1A_47521369 S1A_47581359 S1A_48793364 S1A_48998793 S1A_49153543 S1A_49154769 S1A_49239494 S1A_49245431 S1A_49245501 S1A_49281757 S1B_289085903 S1B_290423403 S1B_299942219 S1B_302036963 S1B_302037041 S1B_302981781 S1B_302981813 S1B_307428944 S1B_307481070 S1B_310691421 S1B_312919008 S1B_31432864…
GID7399485	Pop2	110	S1A_556109917 S1D_18994718 S3A_12479144 S3A_12926280 S3A_13035009 S3A_13267292 S3B_670127593 S4A_641881352 S4A_643152282 S5B_148056220 S5B_148097420 S5B_149551898 S5B_150682936 S5B_152964335 S5B_157460062 S5B_158575503 S5B_158592647 S5B_159064442 S5B_159503563 S5B_159806783 S5B_160861743 S5B_162343291 S5B_162775705 S5B_163119888 S5B_163742941 S5B_168578292 S5B_170303584 S5B_171928398 S5B_17462864…
GID7399829	Pop2	110	S1A_556109917 S1A_579225352 S1A_579407706 S2A_52273147 S2A_62208181 S2B_188722319 S2B_190378167 S3B_10237265 S3B_579163161 S3B_581338402 S3B_581338418 S3B_584743953 S3B_724615114 S3D_609171668 S4A_643152282 S5B_148056220 S5B_148097420 S5B_149551898 S5B_150682936 S5B_152964335 S5B_157460062 S5B_158575503 S5B_158592647 S5B_159064442 S5B_159503563 S5B_159806783 S5B_160861743 S5B_162343291 S5B_162775…
GID7399832	Pop2	114	S1A_556109917 S1A_579225352 S1A_579407706 S2A_52273147 S2A_62208181 S2B_188722319 S2B_190378167 S2B_634694079 S2B_634694109 S2B_638955036 S3B_10237265 S3B_579163161 S3B_581338402 S3B_581338418 S3B_584743953 S3B_724615114 S3D_609171668 S4A_641881352 S4A_643152282 S5B_148056220 S5B_148097420 S5B_149551898 S5B_150682936 S5B_152964335 S5B_157460062 S5B_158575503 S5B_158592647 S5B_159064442 S5B_159503…
GID7400794	Pop2	116	S1A_9600655 S1A_11207721 S1A_13829899 S1A_13844180 S1A_567478043 S1A_574479469 S1A_582654763 S1A_582763967 S1A_583167758 S1A_583171751 S1A_583287245 S1A_583529709 S1A_583715267 S1A_583895754 S1A_584084194 S1B_451069955 S1B_631967546 S1D_41868257 S1D_41915207 S1D_42037079 S1D_42141847 S1D_42277512 S1D_42484009 S1D_42486030 S1D_42767586 S1D_42977190 S1D_43145298 S1D_43181363 S1D_43279407 S1D_432796…
GID7400738	Pop2	117	S1A_1158042 S1A_1158055 S1A_1238021 S1A_1238114 S1A_1698908 S1A_1846791 S1A_2185113 S1A_3218479 S1A_3452684 S1A_4159194 S1A_4206845 S1A_4363168 S1A_6394480 S1A_6424350 S1A_6632531 S1A_7281143 S1A_7285648 S1A_7315187 S1A_7658855 S1A_8118239 S1A_8152172 S1A_8633935 S1A_8668416 S1A_9236507 S1A_49245431 S1A_49891048 S1B_585888040 S2B_188722319 S2B_190378167 S2B_616934964 S2B_617875991 S2B_617949721 S…
GID7400595	Pop2	119	S1A_13829899 S1A_13844180 S1B_451069955 S1D_17855465 S1D_17969622 S1D_18994718 S2B_188722319 S2B_638955036 S2B_748575012 S2B_748595371 S2B_760302061 S3A_12479144 S3A_12926280 S3A_13035009 S3A_13267292 S3B_10237265 S3B_29976536 S3B_41015976 S3B_769597821 S3B_769597829 S3B_769731289 S3B_769809316 S4B_657290599 S5A_13096895 S5A_51793323 S5A_52276139 S5A_52281948 S5A_52357876 S5A_52549357 S5A_5273837…
GID7400073	Pop2	120	S1A_9600655 S1A_534272127 S1A_535896241 S1A_535952223 S1A_535952287 S1A_567478043 S1A_568496490 S1A_568650751 S1A_568721487 S1A_568938225 S1A_570226695 S1A_570227644 S1A_574479469 S1B_451069955 S1B_585888040 S2A_52273147 S2A_62208181 S3B_29976536 S3B_41015976 S4A_641881352 S4A_643152282 S5A_221019452 S5A_699803948 S5A_699849390 S5B_122479801 S5B_148056220 S5B_148097420 S5B_149551898 S5B_150682936…
GID7400318	Pop2	122	S1A_574479469 S1B_289085903 S1B_290423403 S1B_299942219 S1B_302036963 S1B_302037041 S1B_302981781 S1B_302981813 S1B_307428944 S1B_307481070 S1B_310691421 S1B_312919008 S1B_314328647 S1B_315386682 S1B_328818709 S1B_328983650 S1B_343113152 S1B_347032327 S1B_369378931 S1B_370034331 S1B_371139155 S1B_372679251 S1B_372717361 S1B_373495843 S1B_376550760 S1B_377285658 S1B_377911155 S1B_377911433 S1B_378…
GID7397691	Pop2	124	S1A_9600655 S1A_11207721 S1A_11530713 S1A_20697903 S1A_20886731 S1A_41368108 S1A_46222311 S1A_46442544 S1A_47521369 S1A_47581359 S1A_48793364 S1A_48998793 S1A_49153543 S1A_49154769 S1A_49239494 S1A_49245431 S1A_49245501 S1A_49281757 S1B_289085903 S1B_290423403 S1B_299942219 S1B_302036963 S1B_302037041 S1B_302981781 S1B_302981813 S1B_307428944 S1B_307481070 S1B_310691421 S1B_312919008 S1B_31432864…
GID7398701	Pop2	129	S1A_41368108 S1A_46222311 S1A_46442544 S1A_47521369 S1A_47581359 S1A_48793364 S1A_48998793 S1A_49153543 S1A_49154769 S1A_49239494 S1A_49245431 S1A_49245501 S1A_49281757 S1B_289085903 S1B_290423403 S1B_299942219 S1B_302036963 S1B_302037041 S1B_302981781 S1B_302981813 S1B_307428944 S1B_307481070 S1B_310691421 S1B_312919008 S1B_314328647 S1B_315386682 S1B_328818709 S1B_328983650 S1B_343113152 S1B_34…
GID7400679	Pop2	129	S1A_1145442 S1A_1158042 S1A_3218479 S1A_3452684 S1A_4159194 S1A_4206845 S1A_4363168 S1A_9600655 S1A_11207721 S1A_11530713 S1A_13829899 S1A_13844180 S1A_20697903 S1A_20886731 S1B_451069955 S2B_188722319 S2B_190378167 S2B_638955036 S3A_8862441 S3A_9210799 S3A_9212136 S3B_10237265 S3B_29976536 S3B_41015976 S4D_506496395 S4D_509798252 S5A_1294028 S5A_3063365 S5A_51793323 S5A_52276139 S5A_52281948 S5A…
GID7313724	Pop2	130	S1B_289085903 S1B_290423403 S1B_299942219 S1B_302036963 S1B_302037041 S1B_302981781 S1B_302981813 S1B_307428944 S1B_307481070 S1B_310691421 S1B_312919008 S1B_314328647 S1B_315386682 S1B_328818709 S1B_328983650 S1B_343113152 S1B_369378931 S1B_370034331 S1B_371139155 S1B_372679251 S1B_372717361 S1B_376550760 S1B_377285658 S1B_377911155 S1B_377911433 S1B_378010698 S1B_378044906 S1B_378828655 S1B_380…
GID7400769	Pop2	131	S2B_188722319 S2B_190378167 S2B_616934964 S2B_617623462 S2B_617875991 S2B_617949721 S2B_617952912 S2B_620232294 S2B_620850351 S2B_621184651 S2B_634694079 S2B_639310242 S2B_639663776 S2B_642534505 S2B_644162838 S2B_645153757 S2B_646064460 S2B_748575012 S2B_748595371 S2B_764917503 S2B_765035098 S3A_683519275 S3A_683572582 S3A_683982831 S3A_685289392 S3A_685348120 S3B_579163161 S3B_581338402 S3B_581…
GID7396638	Pop2	132	S1A_46222311 S1A_46442544 S1A_47521369 S1A_47581359 S1A_48793364 S1A_48998793 S1A_49153543 S1A_49154769 S1A_49239494 S1A_49245431 S1A_49245501 S1A_49281757 S2B_634694079 S2B_634694109 S2B_638955036 S2B_748575012 S2B_748595371 S2B_764917503 S2B_765035098 S3D_609171668 S4A_641881352 S4A_643152282 S5A_367753934 S5A_534944909 S5A_535010010 S5A_535141981 S5A_536220903 S5A_536221037 S5A_536436122 S5A_5…
GID7396639	Pop2	132	S2B_634694079 S2B_634694109 S2B_638955036 S2B_748575012 S2B_748595371 S2B_760302061 S2B_764917503 S2B_765035098 S3A_45088175 S3D_609171668 S4A_641881352 S4A_643152282 S5A_221019452 S5A_347893268 S5A_367753934 S5A_534944909 S5A_535010010 S5A_535141981 S5A_536220903 S5A_536221037 S5A_536436122 S5A_559517035 S5A_559745278 S5A_559748605 S5A_560470327 S5A_567546777 S5B_148056220 S5B_148097420 S5B_1495…
GID7397501	Pop2	133	S1A_4363168 S1A_579225352 S1A_579407706 S1D_6541259 S1D_6715588 S2A_353644599 S3A_45088175 S3B_41015976 S3B_720856499 S3B_720989723 S3B_721031363 S3B_721046452 S5B_148056220 S5B_148097420 S5B_149551898 S5B_150682936 S5B_152964335 S5B_157460062 S5B_158575503 S5B_158592647 S5B_159064442 S5B_159503563 S5B_159806783 S5B_160861743 S5B_162343291 S5B_162775705 S5B_163119888 S5B_163742941 S5B_168578292 S…
GID7313392	Pop2	141	S1A_4363168 S1B_289085903 S1B_290423403 S1B_299942219 S1B_302036963 S1B_302037041 S1B_302981781 S1B_302981813 S1B_307428944 S1B_307481070 S1B_310691421 S1B_312919008 S1B_314328647 S1B_315386682 S1B_328818709 S1B_328983650 S1B_343113152 S1B_347032327 S1B_369378931 S1B_370034331 S1B_371139155 S1B_372679251 S1B_372717361 S1B_373495843 S1B_376550760 S1B_377285658 S1B_377911155 S1B_377911433 S1B_37801…
GID7397372	Pop2	143	S1A_9600655 S1A_11207721 S1A_11530713 S1A_20697903 S1A_20886731 S1A_41368108 S1A_46222311 S1A_46442544 S1A_47521369 S1A_47581359 S1A_48793364 S1A_48998793 S1A_49153543 S1A_49154769 S1A_49239494 S1A_49245431 S1A_49245501 S1A_49281757 S2B_764917503 S3A_8862441 S3A_9210799 S3A_9212136 S3A_683519275 S3A_683572582 S3A_683982831 S3A_685289392 S3A_685348120 S3B_798344910 S3B_798685474 S3B_799714911 S3B_…
GID7400771	Pop2	144	S1A_9600655 S1A_11207721 S1A_11530713 S1A_13829899 S1A_13844180 S1A_46222311 S1A_46442544 S1A_47581359 S1A_48998793 S1A_49153543 S1A_49239494 S1A_49245431 S1A_49891048 S2B_188722319 S2B_616934964 S2B_617623462 S2B_617875991 S2B_617949721 S2B_617952912 S2B_620232294 S2B_620850351 S2B_621184651 S2B_634694079 S2B_639310242 S2B_639663776 S2B_642534505 S2B_644162838 S2B_645153757 S2B_646064460 S2B_748…
GID7399399	Pop2	145	S1A_567478043 S1A_568496490 S1A_568650751 S1A_568721487 S1A_568938225 S1A_570226695 S1A_570227644 S1A_574479469 S1D_41868257 S1D_41915207 S1D_42037079 S1D_42141847 S1D_42277512 S1D_42484009 S1D_42486030 S1D_42767586 S1D_42977190 S1D_43145298 S1D_43181363 S1D_43279407 S1D_43279601 S1D_43689250 S1D_45484751 S1D_46097921 S1D_46172319 S1D_46223659 S1D_46324848 S1D_46337185 S1D_46392867 S1D_46475610 S…
GID7400704	Pop2	172	S1A_9600655 S1A_11207721 S1A_11530713 S1A_20697903 S1A_20886731 S1A_41368108 S1A_46222311 S1A_46442544 S1A_47521369 S1A_47581359 S1A_48793364 S1A_48998793 S1A_49153543 S1A_49154769 S1A_49239494 S1A_49245431 S1A_49245501 S1A_49281757 S1B_620015835 S2B_784307811 S2B_785548200 S2B_785905982 S3B_10237265 S3B_29976536 S3B_41015976 S5A_1294028 S5A_3063365 S5A_51793323 S5A_52276139 S5A_52281948 S5A_5235…
GID7400281	Pop2	179	S1A_20697903 S1A_534272127 S1B_289085903 S1B_290423403 S1B_299942219 S1B_302036963 S1B_302037041 S1B_302981781 S1B_302981813 S1B_307428944 S1B_307481070 S1B_312919008 S1B_314328647 S1B_315386682 S1B_328818709 S1B_328983650 S1B_334104014 S1B_343113152 S1B_369378931 S1B_370034331 S1B_371139155 S1B_372679251 S1B_372717361 S1B_373495843 S1B_376550760 S1B_377285658 S1B_377911155 S1B_377911433 S1B_3780…
GID7400293	Pop2	188	S1A_41368108 S1A_46222311 S1A_46442544 S1A_47521369 S1A_47581359 S1A_48793364 S1A_48998793 S1A_49153543 S1A_49154769 S1A_49239494 S1A_49245431 S1A_49245501 S1A_49281757 S1B_289085903 S1B_290423403 S1B_299942219 S1B_302036963 S1B_302037041 S1B_302981781 S1B_302981813 S1B_307428944 S1B_307481070 S1B_310691421 S1B_312919008 S1B_314328647 S1B_315386682 S1B_328818709 S1B_328983650 S1B_334104014 S1B_34…
